# Supplementary material for: Estimating effectiveness of case-area targeted response interventions against cholera in Haiti
Source: eLife. 2019 Dec 30;8:e50243. doi: 10.7554/eLife.50243 (PMC7041943; doi:10.7554/eLife.50243)
Supplement: Figure 1—source data 1. [file elife-50243-fig1-data1.xlsx]

## Sheet: Time series
Date	Cases	Cases with severe dhydration	Positive cultures	Localities with current outbreak	CATI	CATI in locality with current outbreak	Daily accumulated rainfall in Centre department
2015-01-01	1	0	0	0	0	0	0
2015-01-02	0	0	0	0	0	0	0
2015-01-03	3	0	0	0	0	0	0
2015-01-04	12	5	0	0	0	0	0
2015-01-05	6	5	0	0	0	0	0
2015-01-06	1	0	0	0	0	0	0
2015-01-07	2	1	0	0	0	0	0
2015-01-08	3	1	0	0	1	0	0
2015-01-09	6	1	0	0	1	0	0
2015-01-10	7	2	0	0	0	0	0
2015-01-11	9	6	0	0	0	0	0.472145
2015-01-12	10	8	0	0	0	0	6.38315
2015-01-13	5	2	0	0	2	0	11.2224
2015-01-14	3	3	0	0	1	0	4.1465
2015-01-15	3	1	0	0	0	0	1.13914
2015-01-16	4	1	0	0	0	0	2.95521
2015-01-17	8	3	0	0	0	0	0.788092
2015-01-18	1	1	0	0	0	0	0
2015-01-19	8	1	0	0	1	0	0
2015-01-20	9	4	0	0	1	0	0
2015-01-21	6	1	0	0	1	0	0
2015-01-22	7	3	0	1	1	0	0
2015-01-23	4	1	0	2	1	0	0
2015-01-24	3	0	0	2	1	0	0
2015-01-25	6	3	0	2	0	0	0
2015-01-26	5	1	0	3	1	0	0
2015-01-27	7	4	0	3	1	0	1.21409
2015-01-28	5	4	0	4	1	0	10.0338
2015-01-29	8	3	0	4	1	0	0
2015-01-30	2	2	0	4	1	0	2.73956
2015-01-31	8	4	0	5	0	0	0
2015-02-01	12	3	0	5	0	0	0
2015-02-02	2	0	0	5	1	0	0
2015-02-03	7	3	0	5	1	0	2.01902
2015-02-04	17	10	0	7	1	1	0
2015-02-05	6	5	0	7	1	0	0
2015-02-06	10	6	0	7	0	0	0
2015-02-07	5	1	0	7	0	0	3.46394
2015-02-08	7	3	0	7	0	0	6.35522
2015-02-09	13	4	0	8	0	0	1.56117
2015-02-10	11	2	0	7	0	0	0
2015-02-11	5	1	0	7	1	0	0
2015-02-12	1	0	0	7	0	0	0
2015-02-13	7	2	0	7	1	1	0
2015-02-14	9	1	0	6	0	0	0
2015-02-15	7	4	0	7	0	0	0
2015-02-16	6	2	0	8	0	0	0
2015-02-17	11	2	0	8	0	0	0
2015-02-18	9	2	0	9	0	0	0
2015-02-19	9	4	0	8	0	0	0
2015-02-20	13	3	0	7	0	0	8.5222
2015-02-21	17	2	0	6	0	0	2.84464
2015-02-22	8	2	0	3	0	0	0
2015-02-23	8	2	0	4	0	0	0
2015-02-24	13	3	0	2	1	0	0
2015-02-25	8	0	0	2	1	0	0
2015-02-26	7	1	0	2	0	0	0
2015-02-27	10	4	0	3	1	0	0
2015-02-28	5	0	0	3	0	0	0
2015-03-01	14	8	0	3	0	0	0
2015-03-02	11	1	0	3	0	0	0
2015-03-03	8	2	0	3	0	0	0
2015-03-04	4	2	0	4	0	0	0
2015-03-05	5	2	0	4	1	0	0
2015-03-06	7	3	0	4	1	0	0
2015-03-07	9	2	0	5	0	0	0
2015-03-08	4	0	0	6	0	0	0
2015-03-09	9	5	0	6	0	0	0
2015-03-10	9	3	0	5	0	0	0
2015-03-11	9	3	0	5	0	0	0
2015-03-12	9	0	0	3	0	0	0
2015-03-13	4	0	0	3	0	0	0
2015-03-14	6	1	0	3	0	0	0
2015-03-15	8	1	0	3	0	0	0
2015-03-16	6	0	0	3	0	0	0
2015-03-17	15	1	2	3	0	0	0.840631
2015-03-18	6	0	0	3	0	0	1.56868
2015-03-19	9	0	1	2	0	0	1.34351
2015-03-20	12	0	1	2	0	0	0.82562
2015-03-21	9	3	0	3	0	0	0
2015-03-22	16	2	0	4	0	0	13.71
2015-03-23	7	2	3	2	0	0	0.885665
2015-03-24	0	0	0	1	1	0	0
2015-03-25	3	1	0	1	0	0	2.58048
2015-03-26	12	2	0	3	0	0	0
2015-03-27	8	1	0	3	0	0	0
2015-03-28	8	1	0	3	0	0	1.18411
2015-03-29	11	2	0	4	0	0	8.56456
2015-03-30	15	1	1	4	0	0	1.87641
2015-03-31	6	0	0	3	0	0	15.9518
2015-04-01	16	4	0	3	1	0	2.3924
2015-04-02	0	0	0	3	1	0	0
2015-04-03	3	0	0	3	0	0	15.1435
2015-04-04	5	1	0	3	0	0	0
2015-04-05	7	0	0	3	0	0	0
2015-04-06	0	0	0	2	0	0	0
2015-04-07	2	1	0	2	0	0	1.71128
2015-04-08	6	0	0	2	0	0	16.0692
2015-04-09	4	1	0	2	1	0	26.0486
2015-04-10	0	0	0	2	0	0	17.9583
2015-04-11	0	0	0	2	0	0	25.9693
2015-04-12	0	0	0	2	0	0	35.6539
2015-04-13	5	1	0	2	0	0	36.9552
2015-04-14	5	0	0	2	1	0	3.67776
2015-04-15	6	0	0	2	1	0	0
2015-04-16	4	0	0	2	1	0	22.1545
2015-04-17	5	1	0	2	1	0	11.8895
2015-04-18	3	1	0	3	0	0	4.97624
2015-04-19	8	1	0	4	0	0	6.2181
2015-04-20	8	1	0	4	0	0	17.7911
2015-04-21	10	2	0	4	0	0	6.74757
2015-04-22	5	0	0	2	0	0	0
2015-04-23	2	0	0	2	1	0	0
2015-04-24	14	4	0	3	0	0	0
2015-04-25	7	0	0	2	0	0	0
2015-04-26	3	1	0	2	0	0	1.30598
2015-04-27	4	1	0	2	0	0	12.1261
2015-04-28	6	1	0	1	0	0	1.16163
2015-04-29	8	0	0	1	1	0	0
2015-04-30	8	0	0	1	1	0	4.18935
2015-05-01	7	0	0	1	0	0	0
2015-05-02	5	0	0	1	0	0	0
2015-05-03	5	0	0	1	0	0	6.27552
2015-05-04	3	0	0	1	0	0	0
2015-05-05	5	0	0	1	1	0	0
2015-05-06	3	0	0	1	1	0	0.779414
2015-05-07	3	0	0	1	1	0	0
2015-05-08	3	0	0	1	1	0	0
2015-05-09	5	0	0	1	0	0	25.6661
2015-05-10	1	0	0	1	0	0	2.59412
2015-05-11	5	0	0	1	0	0	29.9496
2015-05-12	4	0	0	1	0	0	32.7788
2015-05-13	8	0	0	1	0	0	40.1671
2015-05-14	0	0	0	1	0	0	12.345
2015-05-15	5	1	0	1	0	0	0
2015-05-16	4	0	0	1	0	0	7.14742
2015-05-17	11	0	0	1	0	0	4.25918
2015-05-18	4	0	0	1	0	0	44.9326
2015-05-19	3	0	0	0	0	0	1.81364
2015-05-20	2	0	0	0	0	0	22.6758
2015-05-21	2	0	0	0	0	0	54.5999
2015-05-22	0	0	0	0	0	0	47.3592
2015-05-23	0	0	0	0	0	0	11.5768
2015-05-24	6	0	0	0	0	0	6.03477
2015-05-25	9	0	0	0	0	0	3.32133
2015-05-26	1	0	0	0	0	0	0
2015-05-27	5	0	0	0	0	0	0
2015-05-28	0	0	0	0	0	0	14.517
2015-05-29	3	0	0	0	0	0	31.5165
2015-05-30	1	0	0	0	0	0	19.0728
2015-05-31	6	0	0	0	0	0	26.8808
2015-06-01	3	0	0	0	0	0	26.4638
2015-06-02	7	1	0	0	0	0	14.1079
2015-06-03	2	0	0	0	0	0	44.0934
2015-06-04	5	0	0	0	0	0	10.3849
2015-06-05	7	0	0	0	0	0	12.3025
2015-06-06	12	0	0	0	0	0	0
2015-06-07	8	0	0	0	2	0	9.06994
2015-06-08	7	2	0	0	0	0	4.54908
2015-06-09	11	1	0	0	0	0	20.8812
2015-06-10	9	0	0	0	0	0	2.55877
2015-06-11	7	0	0	0	0	0	3.38997
2015-06-12	9	0	0	0	0	0	2.76047
2015-06-13	7	1	0	0	0	0	15.5256
2015-06-14	9	0	0	0	0	0	7.17177
2015-06-15	6	0	0	0	0	0	3.325
2015-06-16	7	0	0	0	0	0	0.817213
2015-06-17	2	0	0	0	4	0	18.2668
2015-06-18	3	0	0	0	0	0	81.6602
2015-06-19	4	0	0	0	0	0	45.7845
2015-06-20	1	0	0	0	0	0	2.96165
2015-06-21	7	0	0	0	0	0	11.9019
2015-06-22	10	0	0	0	2	0	0.509617
2015-06-23	8	1	0	0	1	0	3.87085
2015-06-24	8	1	0	1	0	0	1.68776
2015-06-25	7	0	0	0	1	0	0.262697
2015-06-26	9	0	0	0	1	1	0
2015-06-27	6	0	0	1	0	0	0
2015-06-28	9	0	0	1	0	0	0.269797
2015-06-29	11	1	0	1	3	1	3.6845
2015-06-30	5	0	0	0	3	0	0
2015-07-01	2	0	0	0	0	0	22.0075
2015-07-02	12	3	0	1	0	0	3.50237
2015-07-03	7	1	0	1	0	0	0
2015-07-04	6	3	0	1	0	0	0
2015-07-05	15	4	0	3	0	0	0
2015-07-06	16	6	0	4	5	0	4.60846
2015-07-07	27	8	0	5	4	0	7.20078
2015-07-08	16	6	4	5	2	0	5.01889
2015-07-09	19	3	3	5	3	0	0
2015-07-10	11	3	1	7	2	0	35.3234
2015-07-11	13	4	0	7	0	0	25.7674
2015-07-12	8	4	0	8	0	0	8.17341
2015-07-13	17	9	0	7	4	0	11.4839
2015-07-14	21	5	5	9	1	1	7.878
2015-07-15	20	2	2	11	2	0	13.4953
2015-07-16	13	2	4	9	1	0	40.3192
2015-07-17	14	1	3	9	0	0	12.0774
2015-07-18	13	2	1	8	0	0	2.06405
2015-07-19	11	3	0	9	0	0	0.270203
2015-07-20	14	3	3	10	2	0	0.300225
2015-07-21	15	2	4	10	6	2	7.89721
2015-07-22	15	3	4	9	1	0	6.81847
2015-07-23	12	6	5	12	8	0	47.2696
2015-07-24	9	1	4	11	0	0	1.01199
2015-07-25	15	1	1	9	0	0	7.92296
2015-07-26	15	6	5	10	0	0	0
2015-07-27	8	0	1	8	5	0	0
2015-07-28	12	0	1	8	3	0	0
2015-07-29	18	1	2	10	2	1	2.19915
2015-07-30	10	0	3	8	1	0	7.98484
2015-07-31	14	0	2	8	3	0	8.18044
2015-08-01	8	0	1	6	1	0	4.09319
2015-08-02	6	0	0	6	0	0	17.0758
2015-08-03	8	0	0	6	3	0	0
2015-08-04	8	0	3	7	4	0	8.75019
2015-08-05	10	0	1	7	1	0	3.09042
2015-08-06	5	0	0	7	2	0	23.8201
2015-08-07	3	0	0	7	2	0	20.9727
2015-08-08	11	0	1	7	0	0	17.5236
2015-08-09	7	0	1	6	0	0	17.2744
2015-08-10	9	0	0	5	3	1	18.8598
2015-08-11	14	0	3	6	3	0	4.94981
2015-08-12	7	0	1	6	2	0	17.8977
2015-08-13	8	0	10	6	1	0	36.9625
2015-08-14	7	0	1	5	1	0	21.029
2015-08-15	8	0	0	5	1	0	2.46622
2015-08-16	3	0	0	5	0	0	13.5143
2015-08-17	10	0	0	5	1	0	10.4325
2015-08-18	13	0	0	4	2	0	0
2015-08-19	9	0	0	4	1	0	2.34888
2015-08-20	12	0	0	4	2	1	14.2216
2015-08-21	9	1	0	5	1	0	16.1869
2015-08-22	16	4	0	6	1	0	7.07701
2015-08-23	12	4	0	8	0	0	0
2015-08-24	13	3	0	7	5	0	4.74356
2015-08-25	13	4	0	7	1	0	27.6101
2015-08-26	14	5	0	8	2	1	10.5117
2015-08-27	20	4	0	8	1	1	1.36603
2015-08-28	5	0	0	8	2	0	27.5554
2015-08-29	9	3	0	9	0	0	31.8633
2015-08-30	9	2	0	8	0	0	28.0333
2015-08-31	11	1	0	8	2	1	4.30293
2015-09-01	20	10	0	8	4	0	9.83247
2015-09-02	15	0	0	6	1	0	25.7117
2015-09-03	5	0	0	5	2	1	12.7526
2015-09-04	8	0	0	5	2	0	1.82113
2015-09-05	8	0	0	5	0	0	5.39151
2015-09-06	10	0	0	5	0	0	12.3037
2015-09-07	6	0	0	4	3	0	0
2015-09-08	11	0	1	4	1	1	0
2015-09-09	8	0	0	4	3	0	2.97178
2015-09-10	8	1	0	4	1	0	4.11734
2015-09-11	10	0	0	4	4	1	10.813
2015-09-12	8	3	0	4	0	0	43.1926
2015-09-13	8	1	0	4	0	0	5.82261
2015-09-14	10	1	1	3	1	0	2.46565
2015-09-15	15	4	0	3	4	0	0
2015-09-16	3	0	1	3	3	1	50.5614
2015-09-17	8	2	1	4	1	0	4.07106
2015-09-18	18	3	0	4	2	0	16.0321
2015-09-19	8	0	1	4	0	0	0.375282
2015-09-20	7	0	0	5	0	0	20.0708
2015-09-21	9	0	0	5	2	0	11.3701
2015-09-22	13	6	0	5	1	1	33.133
2015-09-23	9	4	1	5	0	0	51.1856
2015-09-24	5	2	0	5	2	0	41.0113
2015-09-25	4	1	1	5	1	0	11.122
2015-09-26	10	2	0	5	0	0	0
2015-09-27	3	1	0	5	0	0	10.9743
2015-09-28	9	1	0	6	2	0	1.42393
2015-09-29	10	5	0	8	1	0	1.53115
2015-09-30	7	1	0	8	3	1	1.91236
2015-10-01	14	5	1	9	0	0	41.1893
2015-10-02	10	3	0	8	0	0	18.2044
2015-10-03	4	3	0	8	1	0	0
2015-10-04	8	1	0	8	0	0	0
2015-10-05	8	2	0	6	5	0	10.3622
2015-10-06	6	0	0	4	3	0	0
2015-10-07	5	0	0	4	5	1	0
2015-10-08	7	0	0	4	1	0	32.5779
2015-10-09	5	0	0	3	2	0	29.9532
2015-10-10	9	4	3	3	0	0	46.8865
2015-10-11	8	1	1	3	0	0	2.76672
2015-10-12	1	0	0	2	1	1	5.35847
2015-10-13	6	0	0	2	1	0	0
2015-10-14	5	3	0	2	2	1	0
2015-10-15	3	0	0	2	0	0	11.6805
2015-10-16	0	0	0	2	2	0	7.73736
2015-10-17	4	1	0	2	0	0	14.0533
2015-10-18	2	0	0	3	0	0	19.6222
2015-10-19	6	2	0	4	3	1	10.5097
2015-10-20	18	8	0	6	2	0	1.79959
2015-10-21	11	3	6	3	2	2	2.32446
2015-10-22	3	0	0	2	0	0	3.0532
2015-10-23	6	2	0	3	2	2	0
2015-10-24	7	0	0	3	0	0	1.4711
2015-10-25	3	1	0	3	0	0	0
2015-10-26	6	1	0	4	2	1	6.14464
2015-10-27	2	0	0	4	6	2	44.1399
2015-10-28	3	0	3	4	3	0	0
2015-10-29	2	1	0	4	2	2	0
2015-10-30	1	0	0	4	2	0	0
2015-10-31	1	1	0	4	0	0	1.89698
2015-11-01	1	1	0	4	0	0	21.2668
2015-11-02	1	0	0	4	4	1	0
2015-11-03	3	0	0	4	3	0	19.8818
2015-11-04	0	0	0	4	1	0	0
2015-11-05	10	1	0	4	1	0	0
2015-11-06	3	0	0	4	0	0	4.23902
2015-11-07	3	1	0	4	0	0	0.749437
2015-11-08	13	5	1	4	2	0	0
2015-11-09	8	3	0	4	7	0	0
2015-11-10	7	3	1	4	2	1	0
2015-11-11	12	4	0	5	3	0	0
2015-11-12	14	0	2	4	2	0	0
2015-11-13	5	0	2	4	1	0	0
2015-11-14	9	1	2	4	1	0	0
2015-11-15	15	1	5	5	0	0	0
2015-11-16	15	1	1	5	3	0	0
2015-11-17	11	2	0	5	2	1	11.6021
2015-11-18	14	0	0	4	0	0	2.97632
2015-11-19	12	4	2	5	3	0	0.607956
2015-11-20	11	3	0	5	1	0	0
2015-11-21	16	3	1	6	0	0	0
2015-11-22	12	5	0	7	0	0	0
2015-11-23	5	0	0	7	4	1	0
2015-11-24	9	2	0	7	1	1	0
2015-11-25	16	0	1	5	3	0	2.47414
2015-11-26	2	0	0	5	4	0	4.46198
2015-11-27	7	0	0	5	6	0	14.1183
2015-11-28	16	2	0	5	0	0	11.6434
2015-11-29	5	1	0	5	0	0	2.86715
2015-11-30	10	2	0	6	2	0	36.8083
2015-12-01	10	1	0	6	5	1	78.7886
2015-12-02	16	1	0	6	5	0	0
2015-12-03	9	1	0	6	3	1	0.637021
2015-12-04	13	1	0	6	3	0	0
2015-12-05	7	1	0	5	3	1	0.936796
2015-12-06	8	0	0	4	0	0	0
2015-12-07	13	1	0	4	3	0	0
2015-12-08	13	4	0	3	1	0	0
2015-12-09	14	3	0	4	5	0	1.334
2015-12-10	12	2	0	5	2	2	6.9766
2015-12-11	14	3	0	7	5	1	0
2015-12-12	12	2	0	6	0	0	24.5697
2015-12-13	13	1	0	4	0	0	8.28408
2015-12-14	10	2	0	4	2	1	0.629527
2015-12-15	8	0	0	4	6	1	0
2015-12-16	14	2	0	5	4	0	6.09159
2015-12-17	11	1	0	4	4	0	3.54008
2015-12-18	5	1	0	3	2	1	0
2015-12-19	8	0	1	3	2	1	0
2015-12-20	8	2	0	3	0	0	12.6024
2015-12-21	10	2	0	4	1	0	8.80262
2015-12-22	11	2	0	4	2	1	0
2015-12-23	13	1	0	4	2	0	0
2015-12-24	9	1	0	4	0	0	0
2015-12-25	14	2	0	4	2	0	0
2015-12-26	7	2	0	4	2	2	0
2015-12-27	1	0	0	4	0	0	0
2015-12-28	16	1	0	5	5	2	0
2015-12-29	1	0	1	4	1	1	0
2015-12-30	7	4	0	5	0	0	0
2015-12-31	0	0	0	5	0	0	0
2016-01-01	4	1	0	5	2	2	0
2016-01-02	12	5	0	6	0	0	0
2016-01-03	8	2	0	6	0	0	0
2016-01-04	18	8	0	8	3	0	0
2016-01-05	8	3	0	7	8	2	0
2016-01-06	2	0	0	6	6	1	0
2016-01-07	6	1	0	6	4	1	0
2016-01-08	5	2	1	6	5	0	0
2016-01-09	4	1	0	5	0	0	0
2016-01-10	9	4	0	6	1	0	0
2016-01-11	4	2	0	7	3	0	0
2016-01-12	10	3	0	7	5	0	0
2016-01-13	9	1	0	7	10	1	0
2016-01-14	8	6	0	8	6	0	0
2016-01-15	14	5	0	9	3	1	0
2016-01-16	20	5	0	10	0	0	1.02673
2016-01-17	14	4	0	11	0	0	0
2016-01-18	23	8	0	11	4	2	0
2016-01-19	1	0	0	9	0	0	0
2016-01-20	6	1	0	9	1	0	0
2016-01-21	11	6	0	11	5	2	0
2016-01-22	16	6	0	9	3	1	0
2016-01-23	15	7	0	10	0	0	0
2016-01-24	10	4	0	11	0	0	1.75368
2016-01-25	6	0	0	10	3	0	2.6605
2016-01-26	9	2	0	10	5	1	0
2016-01-27	11	3	0	10	4	1	0
2016-01-28	16	3	0	10	5	1	1.07169
2016-01-29	9	1	0	9	2	0	0
2016-01-30	14	4	0	9	0	0	0
2016-01-31	7	1	0	9	0	0	0
2016-02-01	13	7	1	11	4	2	0
2016-02-02	2	0	1	11	4	0	0
2016-02-03	10	4	1	11	7	0	0
2016-02-04	10	1	1	9	1	0	0
2016-02-05	9	2	1	10	5	0	0
2016-02-06	10	3	2	8	0	0	6.36497
2016-02-07	0	0	0	7	0	0	0
2016-02-08	11	2	0	7	0	0	0
2016-02-09	3	0	0	5	2	0	1.81364
2016-02-10	5	1	0	5	3	0	0
2016-02-11	4	0	0	4	3	0	6.56744
2016-02-12	8	0	0	4	5	0	1.25344
2016-02-13	5	0	0	4	0	0	2.75043
2016-02-14	5	3	0	4	0	0	14.9358
2016-02-15	7	0	0	5	5	1	0
2016-02-16	7	3	1	6	2	0	2.27079
2016-02-17	6	2	0	7	2	0	4.46335
2016-02-18	9	6	3	8	0	0	0.600451
2016-02-19	4	1	0	7	2	0	0
2016-02-20	4	0	1	6	1	0	0
2016-02-21	5	1	0	5	1	0	0
2016-02-22	4	0	0	5	1	0	0
2016-02-23	5	0	1	5	6	1	0
2016-02-24	7	2	0	5	3	0	0
2016-02-25	9	0	0	4	2	0	0.94571
2016-02-26	6	1	0	5	1	0	3.50922
2016-02-27	2	1	0	4	2	0	2.7996
2016-02-28	8	4	0	5	0	0	0
2016-02-29	5	1	0	2	3	1	0
2016-03-01	9	2	1	3	3	0	0
2016-03-02	6	2	0	3	2	0	3.35502
2016-03-03	12	3	0	4	3	0	0
2016-03-04	3	0	2	2	0	0	0
2016-03-05	1	0	1	2	0	0	0
2016-03-06	1	0	0	2	0	0	7.67364
2016-03-07	4	0	0	2	3	0	0
2016-03-08	8	0	0	1	0	0	0
2016-03-09	13	7	0	0	3	1	0
2016-03-10	3	1	0	0	2	0	0
2016-03-11	2	1	1	0	2	0	0
2016-03-12	1	0	0	0	0	0	0
2016-03-13	5	1	0	0	3	0	0
2016-03-14	4	1	0	1	3	0	0
2016-03-15	7	2	0	0	1	0	4.50338
2016-03-16	3	0	0	0	2	0	0
2016-03-17	6	0	0	0	1	0	0
2016-03-18	12	7	1	2	2	0	0
2016-03-19	9	1	0	3	0	0	0
2016-03-20	18	5	0	3	0	0	0
2016-03-21	9	2	2	4	3	2	0
2016-03-22	7	1	1	3	1	0	0
2016-03-23	6	3	0	3	1	0	0
2016-03-24	7	4	0	3	4	1	0
2016-03-25	7	1	0	3	0	0	0
2016-03-26	7	1	1	4	0	0	0
2016-03-27	14	2	0	5	3	0	0
2016-03-28	8	3	0	5	3	0	0
2016-03-29	7	2	0	4	8	0	0
2016-03-30	11	2	1	4	4	0	0
2016-03-31	12	3	0	4	5	0	0
2016-04-01	8	1	0	4	2	1	10.2559
2016-04-02	9	0	0	3	0	0	0
2016-04-03	6	0	0	3	3	0	2.11659
2016-04-04	7	4	0	3	1	0	0
2016-04-05	7	1	0	3	2	0	1.39395
2016-04-06	10	5	0	5	3	0	0
2016-04-07	9	0	1	5	3	0	0
2016-04-08	13	5	0	6	3	0	4.49958
2016-04-09	14	4	0	6	0	0	1.50863
2016-04-10	8	1	0	5	0	0	5.35152
2016-04-11	13	5	0	4	2	0	26.4997
2016-04-12	4	1	0	2	2	2	12.5475
2016-04-13	6	0	0	2	5	0	0
2016-04-14	4	2	0	3	5	0	0
2016-04-15	8	1	1	3	4	1	0
2016-04-16	11	0	0	3	1	0	0
2016-04-17	6	2	0	3	0	0	18.5843
2016-04-18	1	0	1	2	4	0	1.35101
2016-04-19	4	0	0	2	2	0	0
2016-04-20	5	2	0	3	2	0	0
2016-04-21	11	3	1	3	2	0	0
2016-04-22	6	1	0	3	4	0	12.2099
2016-04-23	4	1	0	3	0	0	7.13035
2016-04-24	3	2	0	3	3	0	10.1066
2016-04-25	8	1	0	3	0	0	1.41106
2016-04-26	8	3	0	4	3	2	27.7542
2016-04-27	5	1	0	4	2	0	22.0021
2016-04-28	2	1	0	4	1	0	29.1267
2016-04-29	3	1	0	4	1	0	15.18
2016-04-30	3	0	0	4	0	0	22.9265
2016-05-01	3	1	0	4	0	0	30.0375
2016-05-02	21	0	0	10	2	0	14.7159
2016-05-03	36	16	1	13	6	4	33.8474
2016-05-04	15	8	0	14	6	2	14.1869
2016-05-05	15	8	2	17	4	2	0
2016-05-06	24	15	1	17	4	1	7.03698
2016-05-07	27	9	1	14	0	0	43.9504
2016-05-08	13	6	1	16	0	0	0
2016-05-09	31	13	0	14	6	4	54.184
2016-05-10	16	3	2	10	3	0	23.4562
2016-05-11	3	0	0	9	1	0	3.03228
2016-05-12	6	2	0	9	3	1	7.96272
2016-05-13	8	0	0	9	2	0	7.79112
2016-05-14	8	1	0	9	2	1	10.8271
2016-05-15	11	4	0	10	0	0	15.5474
2016-05-16	12	2	1	11	2	1	6.5126
2016-05-17	21	3	0	11	2	1	1.18589
2016-05-18	4	1	0	10	11	0	10.7528
2016-05-19	27	10	2	13	5	0	6.46909
2016-05-20	15	8	0	13	5	4	13.2011
2016-05-21	22	7	0	15	2	0	2.76207
2016-05-22	26	2	0	15	0	0	4.28786
2016-05-23	17	5	0	15	2	2	65.613
2016-05-24	32	13	1	15	3	1	24.4587
2016-05-25	26	12	5	17	2	1	13.4779
2016-05-26	18	7	2	15	5	2	31.3645
2016-05-27	26	13	1	18	7	2	18.3906
2016-05-28	28	4	4	18	0	0	49.6615
2016-05-29	18	6	2	19	0	0	41.3546
2016-05-30	31	10	7	20	5	3	18.7829
2016-05-31	39	7	5	18	1	0	18.582
2016-06-01	35	7	8	19	5	1	31.3436
2016-06-02	23	5	4	19	4	1	55.8878
2016-06-03	26	10	1	19	4	2	28.9891
2016-06-04	18	4	0	20	0	0	13.7101
2016-06-05	30	11	0	22	0	0	5.25897
2016-06-06	28	10	0	24	10	2	0
2016-06-07	43	15	2	27	4	2	9.48589
2016-06-08	50	22	1	29	4	4	3.01425
2016-06-09	31	12	7	35	7	2	0
2016-06-10	31	11	2	36	9	5	1.94174
2016-06-11	24	11	4	33	5	3	2.44524
2016-06-12	25	6	3	31	0	0	12.343
2016-06-13	20	4	4	31	8	3	36.7345
2016-06-14	18	6	1	29	3	3	2.26355
2016-06-15	42	13	0	31	5	3	0
2016-06-16	41	10	1	34	4	3	0.442832
2016-06-17	39	16	2	36	4	1	8.91066
2016-06-18	24	12	2	37	4	3	13.825
2016-06-19	29	9	0	39	3	2	3.56476
2016-06-20	28	15	0	38	9	5	50.7065
2016-06-21	18	5	0	33	1	0	2.73667
2016-06-22	16	6	3	35	10	5	22.654
2016-06-23	17	4	1	33	8	2	9.51904
2016-06-24	28	5	3	32	8	1	30.4921
2016-06-25	22	6	2	32	0	0	34.0887
2016-06-26	50	11	0	34	3	1	8.17037
2016-06-27	32	7	3	32	5	3	11.0434
2016-06-28	33	10	2	34	13	3	8.93851
2016-06-29	28	9	1	31	9	0	17.2193
2016-06-30	36	5	2	32	5	2	0
2016-07-01	27	1	0	28	5	2	0
2016-07-02	37	3	0	26	9	0	81.1517
2016-07-03	28	3	0	26	0	0	1.9348
2016-07-04	26	0	0	26	7	5	1.05079
2016-07-05	17	0	0	23	4	1	16.5751
2016-07-06	22	0	0	23	3	1	0
2016-07-07	24	0	0	23	4	1	20.7344
2016-07-08	27	0	0	21	4	0	9.90198
2016-07-09	19	0	3	21	9	2	1.61269
2016-07-10	26	0	0	20	6	0	1.334
2016-07-11	18	0	0	18	12	3	2.28578
2016-07-12	19	0	0	16	10	1	1.08832
2016-07-13	23	0	0	16	6	0	15.3915
2016-07-14	16	0	1	16	4	1	46.7588
2016-07-15	21	0	0	13	3	2	7.41989
2016-07-16	23	0	2	13	0	0	22.4428
2016-07-17	18	0	0	12	0	0	36.7336
2016-07-18	14	0	0	12	5	0	9.96266
2016-07-19	17	0	1	12	6	1	4.42255
2016-07-20	30	0	1	12	10	1	1.22247
2016-07-21	10	0	0	12	3	1	27.5453
2016-07-22	20	0	0	11	9	1	46.4715
2016-07-23	13	0	0	11	6	0	1.47861
2016-07-24	23	0	0	11	1	0	11.6404
2016-07-25	15	0	0	11	2	1	16.3708
2016-07-26	26	0	0	11	6	1	6.28202
2016-07-27	21	0	0	11	6	0	22.6315
2016-07-28	12	0	1	9	7	0	3.54056
2016-07-29	14	0	0	9	6	2	4.53748
2016-07-30	19	0	0	9	0	0	5.52014
2016-07-31	11	0	0	9	0	0	0
2016-08-01	26	0	0	9	4	0	0
2016-08-02	15	0	0	9	6	0	13.1969
2016-08-03	15	0	0	8	15	2	2.44684
2016-08-04	17	0	0	6	9	0	4.14438
2016-08-05	9	0	0	6	10	0	7.80163
2016-08-06	6	0	0	6	0	0	5.65568
2016-08-07	21	0	0	6	0	0	1.05002
2016-08-08	17	0	0	6	7	0	5.86608
2016-08-09	8	0	0	6	7	1	16.5352
2016-08-10	4	0	0	6	3	0	2.64949
2016-08-11	9	0	0	6	3	1	39.1269
2016-08-12	16	0	0	6	2	0	11.9702
2016-08-13	18	0	0	5	0	0	2.49187
2016-08-14	13	0	0	5	0	0	13.9613
2016-08-15	17	0	0	5	2	0	3.99527
2016-08-16	7	0	0	5	3	0	11.7835
2016-08-17	12	0	0	5	5	0	0
2016-08-18	16	0	0	6	4	0	0.194854
2016-08-19	8	0	0	6	9	0	10.3142
2016-08-20	26	0	1	6	2	1	0.637021
2016-08-21	9	0	0	5	0	0	0.427821
2016-08-22	20	0	0	5	4	0	0
2016-08-23	15	0	0	5	0	0	3.74531
2016-08-24	6	0	0	5	1	0	0.922449
2016-08-25	0	0	0	5	6	0	3.1487
2016-08-26	12	0	1	5	1	0	15.17
2016-08-27	4	0	0	4	3	0	39.8089
2016-08-28	3	0	0	4	0	0	28.5439
2016-08-29	3	0	0	4	2	0	16.8412
2016-08-30	9	0	0	4	0	0	0.892708
2016-08-31	9	0	0	4	5	0	1.45391
2016-09-01	6	0	0	4	2	0	0
2016-09-02	9	0	0	4	3	0	5.66807
2016-09-03	5	0	0	4	0	0	10.958
2016-09-04	11	0	0	4	0	0	18.0271
2016-09-05	7	0	0	4	0	0	0
2016-09-06	6	0	0	4	0	0	1.1631
2016-09-07	11	0	0	4	2	0	47.4612
2016-09-08	2	0	0	4	2	0	5.94326
2016-09-09	14	0	0	4	3	0	30.7805
2016-09-10	22	0	0	4	0	0	35.6262
2016-09-11	9	0	0	3	0	0	30.3086
2016-09-12	19	0	0	3	5	0	13.5063
2016-09-13	13	0	0	3	7	0	7.58228
2016-09-14	25	0	0	3	2	0	6.80092
2016-09-15	18	0	0	3	3	0	1.45538
2016-09-16	12	0	0	3	3	0	0
2016-09-17	19	0	0	3	5	1	1.37948
2016-09-18	14	0	0	2	0	0	6.68001
2016-09-19	12	0	0	2	1	0	41.6595
2016-09-20	11	0	0	2	6	0	8.62282
2016-09-21	18	0	0	2	4	0	64.4937
2016-09-22	16	0	0	2	4	0	19.2583
2016-09-23	24	0	0	2	5	0	15.8334
2016-09-24	23	0	0	2	12	0	5.1735
2016-09-25	26	0	0	2	0	0	21.0047
2016-09-26	19	0	0	2	3	0	37.3224
2016-09-27	8	0	0	2	13	0	59.9777
2016-09-28	11	0	0	2	3	0	6.04252
2016-09-29	9	0	0	2	6	0	0
2016-09-30	7	0	0	2	9	0	0
2016-10-01	9	0	0	2	0	0	10.5189
2016-10-02	12	0	0	2	0	0	0
2016-10-03	11	0	0	2	0	0	41.9523
2016-10-04	8	0	0	2	0	0	80.7649
2016-10-05	15	0	0	2	5	0	39.3426
2016-10-06	6	0	0	2	3	0	0
2016-10-07	15	0	0	2	9	1	0.164876
2016-10-08	14	0	0	2	9	0	0
2016-10-09	9	0	0	3	0	0	0
2016-10-10	17	0	3	3	6	0	0.382213
2016-10-11	18	0	1	3	8	1	5.699
2016-10-12	9	0	1	2	9	1	22.4647
2016-10-13	11	0	0	2	4	1	33.2976
2016-10-14	6	0	0	2	5	0	21.2189
2016-10-15	8	0	1	2	8	0	13.3096
2016-10-16	8	0	0	2	1	0	9.36793
2016-10-17	5	0	0	2	5	0	4.6716
2016-10-18	6	0	0	2	4	0	12.7646
2016-10-19	19	0	0	2	4	0	8.73065
2016-10-20	24	0	0	2	3	0	28.6615
2016-10-21	12	0	0	1	26	0	2.68423
2016-10-22	6	0	0	1	7	0	0
2016-10-23	8	0	0	2	0	0	27.03
2016-10-24	4	0	0	1	4	0	34.9868
2016-10-25	5	0	1	1	9	1	0
2016-10-26	6	0	0	1	7	1	0
2016-10-27	11	0	0	1	11	0	0.749437
2016-10-28	1	0	0	1	9	0	3.05295
2016-10-29	3	0	0	1	3	0	11.8264
2016-10-30	4	0	0	1	0	0	31.8211
2016-10-31	8	0	0	1	2	0	8.01602
2016-11-01	9	0	0	1	0	0	0
2016-11-02	16	0	0	2	5	0	0
2016-11-03	9	0	5	2	15	0	0
2016-11-04	13	0	0	1	4	1	0
2016-11-05	3	0	0	1	14	1	3.30702
2016-11-06	6	0	0	1	0	0	1.24594
2016-11-07	8	0	0	1	10	0	0
2016-11-08	14	0	0	1	11	0	0
2016-11-09	7	0	0	1	6	0	0
2016-11-10	13	0	0	1	10	0	0
2016-11-11	8	0	0	1	9	0	1.02673
2016-11-12	13	0	0	1	8	0	0
2016-11-13	6	0	0	1	0	0	0
2016-11-14	7	0	0	1	6	0	0
2016-11-15	6	0	0	1	13	0	7.43944
2016-11-16	8	0	0	1	7	0	3.83904
2016-11-17	6	0	0	1	8	0	1.21591
2016-11-18	5	0	0	1	3	0	0.914313
2016-11-19	6	0	0	1	3	0	0
2016-11-20	4	0	0	1	0	0	0
2016-11-21	4	0	0	1	5	0	0
2016-11-22	5	0	0	1	1	0	0
2016-11-23	8	0	0	0	9	0	3.87671
2016-11-24	0	0	0	0	5	0	6.05013
2016-11-25	11	0	0	0	0	0	0
2016-11-26	3	0	0	0	5	0	0
2016-11-27	9	0	0	0	0	0	0.5321
2016-11-28	9	0	0	0	0	0	0
2016-11-29	8	0	0	0	10	0	0
2016-11-30	4	0	0	0	4	0	0
2016-12-01	6	0	0	0	8	0	0
2016-12-02	3	0	1	0	5	0	0
2016-12-03	3	0	0	0	2	0	0
2016-12-04	5	0	0	0	0	0	0
2016-12-05	3	0	0	0	5	0	0
2016-12-06	9	0	0	0	2	0	0
2016-12-07	2	0	0	0	4	0	0
2016-12-08	8	0	0	0	3	0	0
2016-12-09	6	0	0	0	4	0	0
2016-12-10	3	0	0	0	1	0	0
2016-12-11	8	0	0	0	0	0	3.30766
2016-12-12	0	0	0	0	9	0	0
2016-12-13	0	0	0	0	3	0	0
2016-12-14	0	0	1	0	7	0	0
2016-12-15	0	0	1	0	6	0	0
2016-12-16	0	0	0	0	5	0	0
2016-12-17	0	0	0	0	4	0	0
2016-12-18	0	0	0	0	0	0	0
2016-12-19	0	0	0	0	7	0	0
2016-12-20	0	0	0	0	1	0	0
2016-12-21	0	0	0	0	6	0	0
2016-12-22	0	0	0	0	13	0	0
2016-12-23	0	0	0	0	7	0	0
2016-12-24	0	0	0	0	3	0	0
2016-12-25	0	0	0	0	0	0	0
2016-12-26	0	0	0	0	6	0	0
2016-12-27	0	0	0	0	6	0	0
2016-12-28	0	0	0	0	2	0	0
2016-12-29	0	0	0	0	4	0	0
2016-12-30	0	0	0	0	5	0	0.906818
2016-12-31	0	0	0	0	0	0	0
2017-01-01	0	0	0	0	0	0	0
2017-01-02	9	2	0	0	0	0	0
2017-01-03	1	0	0	0	1	0	0
2017-01-04	16	4	0	1	8	0	0
2017-01-05	7	0	0	1	2	0	0
2017-01-06	10	1	0	1	10	0	0
2017-01-07	10	4	0	1	2	0	4.69536
2017-01-08	6	3	0	0	0	0	0.577934
2017-01-09	4	2	0	0	3	0	6.06631
2017-01-10	11	5	0	0	9	0	0
2017-01-11	12	2	0	0	0	0	0
2017-01-12	8	3	0	1	7	0	0
2017-01-13	2	0	0	0	9	0	0
2017-01-14	6	1	0	0	0	0	0
2017-01-15	3	0	0	0	0	0	0
2017-01-16	3	1	0	0	6	0	0
2017-01-17	4	2	0	0	1	0	0
2017-01-18	3	0	0	0	2	0	0
2017-01-19	7	1	0	0	4	0	0
2017-01-20	1	1	0	0	6	0	0
2017-01-21	2	0	0	0	0	0	0
2017-01-22	4	2	0	1	0	0	0
2017-01-23	8	2	0	2	3	0	0
2017-01-24	7	0	3	1	5	1	0
2017-01-25	8	1	0	0	5	1	0
2017-01-26	2	0	0	0	7	0	0
2017-01-27	8	0	0	0	8	0	0
2017-01-28	4	2	0	2	0	0	0
2017-01-29	6	0	0	1	0	0	0
2017-01-30	9	0	0	1	8	2	0
2017-01-31	2	1	0	1	9	0	0
2017-02-01	14	4	0	3	3	1	0
2017-02-02	8	1	0	3	6	0	0
2017-02-03	10	6	0	5	8	2	0
2017-02-04	13	4	0	5	0	0	0
2017-02-05	4	1	0	4	0	0	0
2017-02-06	18	2	0	5	2	0	0
2017-02-07	10	1	0	4	5	0	0
2017-02-08	7	3	0	4	12	0	0
2017-02-09	14	1	0	4	11	0	5.00626
2017-02-10	10	1	0	4	10	0	0
2017-02-11	9	2	1	4	0	0	0
2017-02-12	10	1	1	4	1	0	1.0658
2017-02-13	4	1	0	4	10	1	4.12059
2017-02-14	6	2	0	5	10	1	0
2017-02-15	6	4	0	5	4	1	7.03635
2017-02-16	3	0	0	5	6	0	0
2017-02-17	10	3	0	7	7	1	0
2017-02-18	9	3	0	8	4	1	0
2017-02-19	10	5	0	7	0	0	0
2017-02-20	15	4	0	10	9	2	0
2017-02-21	13	3	1	10	16	3	0
2017-02-22	13	4	0	9	15	4	0
2017-02-23	16	6	0	12	15	6	0
2017-02-24	13	7	0	13	20	5	6.38912
2017-02-25	5	2	0	13	9	3	2.18835
2017-02-26	14	3	0	12	0	0	0
2017-02-27	12	5	0	14	9	2	0
2017-02-28	11	3	0	14	7	4	0
2017-03-01	4	2	0	12	7	1	0
2017-03-02	2	0	0	12	10	0	0
2017-03-03	9	1	0	12	8	4	0
2017-03-04	18	3	0	12	14	1	0
2017-03-05	11	4	0	13	2	0	0
2017-03-06	18	0	0	13	7	3	0
2017-03-07	21	3	0	14	11	4	0
2017-03-08	22	4	0	9	16	4	0
2017-03-09	16	3	0	9	25	1	0
2017-03-10	17	3	0	9	11	0	0
2017-03-11	16	3	0	9	6	0	9.41038
2017-03-12	16	4	0	11	2	0	14.9374
2017-03-13	13	1	0	9	7	4	11.4041
2017-03-14	16	4	0	11	9	2	17.0027
2017-03-15	18	3	5	14	10	3	11.3845
2017-03-16	11	6	2	15	9	3	13.1585
2017-03-17	17	7	0	13	13	5	0
2017-03-18	10	3	0	13	7	0	0
2017-03-19	11	2	0	13	0	0	1.8661
2017-03-20	17	3	0	16	18	5	5.94648
2017-03-21	23	6	0	16	20	5	4.47024
2017-03-22	16	8	0	15	21	2	4.39919
2017-03-23	10	2	0	14	29	8	0
2017-03-24	22	5	0	14	10	4	0
2017-03-25	11	3	0	14	6	0	3.316
2017-03-26	11	5	0	15	0	0	0
2017-03-27	7	3	0	14	8	2	0
2017-03-28	10	4	0	14	8	3	0
2017-03-29	5	3	0	14	2	0	0
2017-03-30	9	2	0	14	3	0	0
2017-03-31	13	4	0	16	5	1	0
2017-04-01	18	4	0	15	7	2	1.13335
2017-04-02	12	2	0	15	1	0	0
2017-04-03	19	5	1	16	9	4	3.21026
2017-04-04	9	3	0	13	10	1	0
2017-04-05	16	3	3	14	7	0	0
2017-04-06	16	1	0	14	5	3	0
2017-04-07	22	2	0	12	9	1	0
2017-04-08	20	5	0	12	7	0	0
2017-04-09	7	2	0	12	0	0	29.6491
2017-04-10	10	4	0	11	10	0	24.5847
2017-04-11	11	2	0	11	6	2	3.37754
2017-04-12	9	1	0	10	5	0	0
2017-04-13	5	3	0	11	2	0	0
2017-04-14	8	1	0	10	0	0	0
2017-04-15	10	5	0	11	3	0	0
2017-04-16	11	3	0	12	0	0	0
2017-04-17	8	5	0	11	10	3	45.4755
2017-04-18	3	1	0	11	6	0	34.3375
2017-04-19	11	0	0	12	1	0	31.2157
2017-04-20	12	4	0	12	2	0	12.9288
2017-04-21	10	2	0	13	6	2	16.8965
2017-04-22	17	3	0	14	6	3	21.0662
2017-04-23	7	1	0	13	0	0	29.1609
2017-04-24	11	5	0	14	9	5	45.8076
2017-04-25	8	2	0	13	11	2	19.4816
2017-04-26	8	2	0	13	8	2	38.8556
2017-04-27	18	2	1	13	6	0	87.9976
2017-04-28	18	1	0	13	4	1	113.174
2017-04-29	14	1	0	14	6	1	71.0566
2017-04-30	15	1	0	14	0	0	21.5449
2017-05-01	13	5	0	14	2	0	13.7083
2017-05-02	6	1	0	13	12	3	14.5826
2017-05-03	11	1	0	11	5	1	3.09842
2017-05-04	18	2	0	12	4	0	6.50009
2017-05-05	16	6	1	15	8	1	16.5551
2017-05-06	15	3	0	14	9	7	35.9014
2017-05-07	14	3	3	14	0	0	42.4281
2017-05-08	9	3	0	14	13	1	33.9372
2017-05-09	12	3	0	15	5	0	0.900676
2017-05-10	16	3	1	14	7	1	0
2017-05-11	12	0	2	14	7	1	0
2017-05-12	17	1	1	13	11	0	0
2017-05-13	19	3	2	12	6	3	0.848137
2017-05-14	7	1	0	10	1	0	0
2017-05-15	11	1	0	11	13	2	7.03119
2017-05-16	8	0	1	10	8	1	42.5792
2017-05-17	6	2	1	12	7	3	75.8436
2017-05-18	7	2	0	11	2	2	26.1596
2017-05-19	7	1	1	11	6	2	0.472145
2017-05-20	6	0	0	10	5	1	12.8263
2017-05-21	11	3	1	12	0	0	15.6163
2017-05-22	20	3	2	11	15	3	26.2657
2017-05-23	8	2	1	9	12	2	14.2309
2017-05-24	4	2	2	9	5	1	0
2017-05-25	12	1	3	9	4	0	0
2017-05-26	6	3	1	9	8	3	0
2017-05-27	8	2	0	9	6	3	16.0614
2017-05-28	8	2	0	9	0	0	5.16968
2017-05-29	9	4	1	9	10	1	2.57443
2017-05-30	5	2	0	8	8	3	37.5133
2017-05-31	4	3	0	9	1	0	9.13671
2017-06-01	4	2	0	9	4	1	9.3396
2017-06-02	9	2	1	10	7	2	0
2017-06-03	10	5	2	10	5	1	23.7286
2017-06-04	7	2	1	9	0	0	24.9666
2017-06-05	7	1	1	8	7	1	7.7002
2017-06-06	3	0	2	6	10	2	0
2017-06-07	10	2	1	7	5	1	0
2017-06-08	8	4	0	6	7	1	0.660496
2017-06-09	11	2	0	7	5	0	10.7552
2017-06-10	4	1	0	6	0	0	14.1066
2017-06-11	4	1	0	6	4	1	2.66358
2017-06-12	10	5	0	7	8	1	0
2017-06-13	7	0	0	7	6	1	15.5327
2017-06-14	2	1	0	7	5	2	18.2177
2017-06-15	7	1	0	7	3	1	20.4869
2017-06-16	4	2	0	7	3	2	30.6005
2017-06-17	12	7	2	7	1	1	6.30779
2017-06-18	4	1	2	6	2	1	0
2017-06-19	9	2	1	6	8	2	0
2017-06-20	11	2	1	5	7	1	8.56379
2017-06-21	6	1	1	6	6	0	0.232675
2017-06-22	6	4	1	6	9	3	0.435327
2017-06-23	11	1	1	5	5	1	0
2017-06-24	10	4	1	5	4	2	2.59431
2017-06-25	10	3	2	8	1	0	15.7544
2017-06-26	9	8	2	9	8	2	1.22158
2017-06-27	8	1	5	6	6	0	19.0674
2017-06-28	8	2	2	8	7	4	3.99272
2017-06-29	7	2	2	8	9	2	0.803103
2017-06-30	4	0	0	5	9	1	51.3981
2017-07-01	4	1	1	5	1	0	42.676
2017-07-02	3	0	1	4	0	0	23.3608
2017-07-03	12	4	0	4	15	3	6.71025
2017-07-04	19	2	1	3	7	0	35.8885
2017-07-05	9	4	0	3	8	0	2.01694
2017-07-06	10	1	3	4	10	0	4.88431
2017-07-07	9	3	2	4	7	0	0
2017-07-08	11	5	1	4	4	0	5.04094
2017-07-09	3	1	1	4	2	0	26.1442
2017-07-10	6	1	1	3	11	1	49.2809
2017-07-11	7	1	1	3	16	0	14.9602
2017-07-12	6	2	0	3	7	0	9.88376
2017-07-13	7	3	0	5	9	3	8.52204
2017-07-14	8	4	0	5	4	0	17.9654
2017-07-15	17	8	0	7	5	2	10.1834
2017-07-16	7	3	0	6	2	0	44.6998
2017-07-17	11	6	4	8	11	2	7.51936
2017-07-18	16	9	3	9	13	6	0
2017-07-19	10	1	5	9	16	10	0.764425
2017-07-20	10	2	0	8	15	4	0
2017-07-21	5	3	0	8	10	4	0
2017-07-22	7	4	0	9	4	1	2.24175
2017-07-23	4	2	0	9	0	0	10.7932
2017-07-24	8	1	2	8	10	2	11.6427
2017-07-25	6	3	1	8	6	2	11.9233
2017-07-26	5	1	0	7	6	0	21.393
2017-07-27	10	3	1	9	5	2	14.0098
2017-07-28	18	8	1	10	11	2	2.03345
2017-07-29	10	5	0	11	3	1	27.207
2017-07-30	5	2	1	8	1	0	21.8809
2017-07-31	14	2	1	8	14	5	2.72924
2017-08-01	0	0	2	8	6	2	1.81596
2017-08-02	2	0	2	7	10	0	0
2017-08-03	11	4	1	8	13	2	30.3042
2017-08-04	8	2	1	8	6	2	0.41219
2017-08-05	5	0	1	8	9	0	36.4639
2017-08-06	12	0	1	8	4	1	0.78009
2017-08-07	8	3	1	8	10	2	12.6192
2017-08-08	5	1	1	8	9	2	5.53922
2017-08-09	16	8	1	9	4	1	11.8257
2017-08-10	6	2	0	8	4	2	4.30073
2017-08-11	5	1	0	8	5	0	20.1979
2017-08-12	6	3	0	9	11	2	25.1064
2017-08-13	15	6	0	9	0	0	16.9361
2017-08-14	10	6	5	9	13	6	2.40598
2017-08-15	14	2	0	8	4	2	26.7979
2017-08-16	18	6	2	7	11	2	0
2017-08-17	11	6	0	7	11	5	0.855642
2017-08-18	4	1	2	7	8	2	0
2017-08-19	6	2	0	7	1	0	0
2017-08-20	9	2	0	7	0	0	7.91828
2017-08-21	9	5	0	8	5	0	0.509617
2017-08-22	12	2	4	9	7	0	23.7515
2017-08-23	4	3	3	10	6	3	6.02253
2017-08-24	5	2	0	8	6	2	12.6702
2017-08-25	6	5	0	7	5	2	7.55462
2017-08-26	6	4	0	6	4	1	4.36677
2017-08-27	5	0	0	6	0	0	4.97458
2017-08-28	6	1	0	5	6	1	9.18872
2017-08-29	7	1	0	6	2	0	6.39595
2017-08-30	10	3	0	7	6	0	53.9423
2017-08-31	3	1	0	6	7	3	0.863148
2017-09-01	4	0	0	6	1	0	0.539594
2017-09-02	9	6	0	7	1	0	2.90468
2017-09-03	10	3	0	6	0	0	8.68795
2017-09-04	6	1	0	6	8	0	43.7272
2017-09-05	10	4	0	8	2	0	4.2607
2017-09-06	3	0	0	6	9	3	0
2017-09-07	10	3	0	7	1	1	64.4027
2017-09-08	8	2	0	5	2	0	33.2739
2017-09-09	7	3	0	5	8	1	4.71647
2017-09-10	3	1	0	5	3	0	2.43898
2017-09-11	4	2	0	5	8	0	0.742596
2017-09-12	8	3	0	5	8	1	6.21112
2017-09-13	11	3	2	5	6	0	1.83804
2017-09-14	10	5	0	5	9	2	7.74019
2017-09-15	5	1	0	5	8	0	21.8898
2017-09-16	8	3	0	5	4	2	20.1145
2017-09-17	11	0	0	5	0	0	14.5882
2017-09-18	5	1	1	4	7	0	0.562923
2017-09-19	7	2	0	5	9	3	11.137
2017-09-20	7	1	0	6	6	0	0.149887
2017-09-21	12	3	0	6	3	0	20.1561
2017-09-22	12	2	0	6	3	1	0.41281
2017-09-23	5	3	0	7	0	0	0
2017-09-24	8	2	0	7	0	0	21.5291
2017-09-25	9	2	0	7	9	2	24.0184
2017-09-26	6	1	0	7	7	4	6.90135
2017-09-27	7	1	0	8	9	1	0
2017-09-28	2	0	0	7	4	2	3.00745
2017-09-29	6	3	2	9	1	0	5.685
2017-09-30	8	3	0	8	3	2	18.6112
2017-10-01	4	0	2	7	3	0	6.13009
2017-10-02	4	1	2	8	11	1	0
2017-10-03	14	5	4	8	7	1	3.20759
2017-10-04	6	2	2	7	6	0	2.06095
2017-10-05	12	3	1	7	3	0	2.74294
2017-10-06	4	0	0	5	5	2	18.9513
2017-10-07	13	3	0	5	4	0	3.22654
2017-10-08	11	3	0	5	0	0	2.78459
2017-10-09	6	5	1	5	11	1	11.8776
2017-10-10	13	4	2	6	8	2	0
2017-10-11	4	2	1	8	7	2	0
2017-10-12	7	3	6	8	6	1	1.76326
2017-10-13	21	3	1	9	9	3	5.33574
2017-10-14	5	2	0	8	7	0	1.1934
2017-10-15	12	10	0	8	0	0	0
2017-10-16	3	2	0	7	10	1	18.4064
2017-10-17	5	1	1	7	5	3	24.1537
2017-10-18	9	5	0	8	8	1	24.0773
2017-10-19	9	4	0	6	5	2	0
2017-10-20	6	3	0	6	6	0	0
2017-10-21	11	4	2	8	11	1	0
2017-10-22	8	3	0	7	0	0	0
2017-10-23	10	2	0	6	12	2	0
2017-10-24	5	0	0	7	9	1	2.16686
2017-10-25	9	5	1	9	2	2	0.801897
2017-10-26	11	3	2	9	7	2	10.1566
2017-10-27	7	3	3	12	7	3	0
2017-10-28	8	0	1	11	3	1	0
2017-10-29	11	3	1	11	0	0	0
2017-10-30	9	3	1	10	8	3	0
2017-10-31	3	0	0	9	9	1	0.960721
2017-11-01	1	0	1	8	4	0	0
2017-11-02	3	1	2	8	7	3	0
2017-11-03	11	3	2	8	7	2	0
2017-11-04	4	2	2	7	7	0	2.78459
2017-11-05	11	4	0	7	0	0	11.7347
2017-11-06	6	2	2	7	4	0	28.6717
2017-11-07	3	2	0	7	7	1	14.2548
2017-11-08	14	3	3	9	1	0	12.567
2017-11-09	18	6	4	9	7	2	6.2257
2017-11-10	12	6	2	8	3	0	10.789
2017-11-11	5	4	0	8	2	2	6.58792
2017-11-12	14	0	0	7	1	0	19.4423
2017-11-13	7	2	4	9	5	0	1.26655
2017-11-14	3	1	0	7	7	3	3.4549
2017-11-15	4	3	1	7	3	0	56.2234
2017-11-16	6	1	2	8	7	1	12.6932
2017-11-17	8	3	0	7	6	2	9.69585
2017-11-18	17	5	0	8	4	0	0
2017-11-19	17	4	0	6	6	2	0
2017-11-20	9	3	3	5	23	8	20.6824
2017-11-21	4	1	1	4	4	1	1.53634
2017-11-22	4	2	2	4	5	0	0
2017-11-23	8	3	1	4	0	0	0
2017-11-24	3	0	0	4	8	2	0
2017-11-25	6	5	3	5	1	0	10.7068
2017-11-26	4	1	1	3	0	0	0
2017-11-27	8	5	4	5	9	2	0
2017-11-28	8	3	2	4	7	3	0
2017-11-29	4	2	4	4	3	1	0
2017-11-30	12	7	0	3	9	1	0
2017-12-01	7	2	0	2	10	1	0
2017-12-02	2	2	0	2	3	0	0
2017-12-03	14	6	0	5	0	0	0
2017-12-04	4	0	0	3	10	1	0
2017-12-05	13	4	0	4	9	0	0
2017-12-06	3	0	0	2	1	0	2.99307
2017-12-07	9	4	0	2	6	0	3.65725
2017-12-08	8	3	0	3	0	0	0
2017-12-09	9	4	0	3	6	0	0
2017-12-10	13	6	0	2	1	0	0
2017-12-11	7	2	0	0	7	0	0
2017-12-12	7	1	0	0	11	0	0
2017-12-13	7	3	0	0	4	0	5.92634
2017-12-14	6	0	0	0	7	0	0
2017-12-15	6	2	1	0	5	0	0
2017-12-16	2	1	2	0	7	0	0
2017-12-17	0	0	1	0	0	0	0
2017-12-18	0	0	2	0	11	0	0
2017-12-19	0	0	3	0	4	0	0
2017-12-20	0	0	2	0	3	0	0
2017-12-21	0	0	1	0	1	0	0
2017-12-22	0	0	0	0	2	0	0
2017-12-23	0	0	0	0	3	0	0
2017-12-24	0	0	0	0	2	0	0
2017-12-25	0	0	0	0	0	0	0
2017-12-26	0	0	0	0	0	0	0
2017-12-27	0	0	0	0	0	0	0
2017-12-28	0	0	0	0	1	0	0
2017-12-29	0	0	0	0	1	0	2.89283
2017-12-30	0	0	0	0	1	0	3.18895
2017-12-31	0	0	0	0	0	0	1.11834
