# Supplementary material for: Estimating effectiveness of case-area targeted response interventions against cholera in Haiti
Source: eLife. 2019 Dec 30;8:e50243. doi: 10.7554/eLife.50243 (PMC7041943; doi:10.7554/eLife.50243)
Supplement: Figure 2—source data 1. [file elife-50243-fig2-data1.xlsx]

## Sheet: Cases_linelist
Date of admission	Rehydration plan	Locality_ID
2015-01-01	B (some dehydration. ORS and observe at hospital)	206
2015-01-03	B (some dehydration. ORS and observe at hospital)	206
2015-01-03	B (some dehydration. ORS and observe at hospital)	64
2015-01-03	B (some dehydration. ORS and observe at hospital)	221
2015-01-03	C (severe dehydration. IV fluids)	ND
2015-01-03	C (severe dehydration. IV fluids)	ND
2015-01-04	A (no dehydration. Send home with ORS)	621
2015-01-04	A (no dehydration. Send home with ORS)	482
2015-01-04	A (no dehydration. Send home with ORS)	512
2015-01-04	A (no dehydration. Send home with ORS)	512
2015-01-04	A (no dehydration. Send home with ORS)	512
2015-01-04	B (some dehydration. ORS and observe at hospital)	288
2015-01-04	B (some dehydration. ORS and observe at hospital)	ND
2015-01-04	B (some dehydration. ORS and observe at hospital)	1017
2015-01-04	B (some dehydration. ORS and observe at hospital)	ND
2015-01-04	C (severe dehydration. IV fluids)	499
2015-01-04	C (severe dehydration. IV fluids)	664
2015-01-04	C (severe dehydration. IV fluids)	611
2015-01-04	C (severe dehydration. IV fluids)	506
2015-01-04	C (severe dehydration. IV fluids)	561
2015-01-05	B (some dehydration. ORS and observe at hospital)	287
2015-01-05	C (severe dehydration. IV fluids)	610
2015-01-05	C (severe dehydration. IV fluids)	610
2015-01-05	C (severe dehydration. IV fluids)	680
2015-01-05	C (severe dehydration. IV fluids)	489
2015-01-05	C (severe dehydration. IV fluids)	501
2015-01-06	B (some dehydration. ORS and observe at hospital)	1372
2015-01-07	B (some dehydration. ORS and observe at hospital)	421
2015-01-07	C (severe dehydration. IV fluids)	165
2015-01-07	C (severe dehydration. IV fluids)	ND
2015-01-08	A (no dehydration. Send home with ORS)	577
2015-01-08	B (some dehydration. ORS and observe at hospital)	957
2015-01-08	C (severe dehydration. IV fluids)	593
2015-01-09	A (no dehydration. Send home with ORS)	577
2015-01-09	A (no dehydration. Send home with ORS)	481
2015-01-09	A (no dehydration. Send home with ORS)	514
2015-01-09	B (some dehydration. ORS and observe at hospital)	1309
2015-01-09	B (some dehydration. ORS and observe at hospital)	637
2015-01-09	C (severe dehydration. IV fluids)	486
2015-01-10	A (no dehydration. Send home with ORS)	586
2015-01-10	A (no dehydration. Send home with ORS)	555
2015-01-10	B (some dehydration. ORS and observe at hospital)	535
2015-01-10	B (some dehydration. ORS and observe at hospital)	247
2015-01-10	B (some dehydration. ORS and observe at hospital)	637
2015-01-10	C (severe dehydration. IV fluids)	552
2015-01-10	C (severe dehydration. IV fluids)	458
2015-01-11	B (some dehydration. ORS and observe at hospital)	175
2015-01-11	B (some dehydration. ORS and observe at hospital)	518
2015-01-11	B (some dehydration. ORS and observe at hospital)	151
2015-01-11	B (some dehydration. ORS and observe at hospital)	ND
2015-01-11	C (severe dehydration. IV fluids)	481
2015-01-11	C (severe dehydration. IV fluids)	535
2015-01-11	C (severe dehydration. IV fluids)	607
2015-01-11	C (severe dehydration. IV fluids)	498
2015-01-11	C (severe dehydration. IV fluids)	518
2015-01-11	C (severe dehydration. IV fluids)	481
2015-01-12	B (some dehydration. ORS and observe at hospital)	247
2015-01-12	B (some dehydration. ORS and observe at hospital)	498
2015-01-12	C (severe dehydration. IV fluids)	1302
2015-01-12	C (severe dehydration. IV fluids)	341
2015-01-12	C (severe dehydration. IV fluids)	370
2015-01-12	C (severe dehydration. IV fluids)	535
2015-01-12	C (severe dehydration. IV fluids)	535
2015-01-12	C (severe dehydration. IV fluids)	498
2015-01-12	C (severe dehydration. IV fluids)	363
2015-01-12	C (severe dehydration. IV fluids)	407
2015-01-13	A (no dehydration. Send home with ORS)	587
2015-01-13	A (no dehydration. Send home with ORS)	ND
2015-01-13	A (no dehydration. Send home with ORS)	481
2015-01-13	B (some dehydration. ORS and observe at hospital)	272
2015-01-13	C (severe dehydration. IV fluids)	481
2015-01-13	C (severe dehydration. IV fluids)	518
2015-01-13	C (severe dehydration. IV fluids)	ND
2015-01-14	C (severe dehydration. IV fluids)	710
2015-01-14	C (severe dehydration. IV fluids)	481
2015-01-14	C (severe dehydration. IV fluids)	327
2015-01-15	B (some dehydration. ORS and observe at hospital)	498
2015-01-15	B (some dehydration. ORS and observe at hospital)	389
2015-01-15	C (severe dehydration. IV fluids)	332
2015-01-16	ND	ND
2015-01-16	ND	463
2015-01-16	ND	329
2015-01-16	B (some dehydration. ORS and observe at hospital)	225
2015-01-16	C (severe dehydration. IV fluids)	377
2015-01-17	ND	409
2015-01-17	A (no dehydration. Send home with ORS)	587
2015-01-17	B (some dehydration. ORS and observe at hospital)	224
2015-01-17	B (some dehydration. ORS and observe at hospital)	300
2015-01-17	B (some dehydration. ORS and observe at hospital)	225
2015-01-17	C (severe dehydration. IV fluids)	557
2015-01-17	C (severe dehydration. IV fluids)	532
2015-01-17	C (severe dehydration. IV fluids)	633
2015-01-18	C (severe dehydration. IV fluids)	554
2015-01-19	ND	710
2015-01-19	ND	737
2015-01-19	ND	737
2015-01-19	A (no dehydration. Send home with ORS)	594
2015-01-19	A (no dehydration. Send home with ORS)	1172
2015-01-19	B (some dehydration. ORS and observe at hospital)	225
2015-01-19	B (some dehydration. ORS and observe at hospital)	ND
2015-01-19	B (some dehydration. ORS and observe at hospital)	263
2015-01-19	C (severe dehydration. IV fluids)	527
2015-01-20	A (no dehydration. Send home with ORS)	517
2015-01-20	A (no dehydration. Send home with ORS)	549
2015-01-20	A (no dehydration. Send home with ORS)	504
2015-01-20	A (no dehydration. Send home with ORS)	ND
2015-01-20	B (some dehydration. ORS and observe at hospital)	206
2015-01-20	B (some dehydration. ORS and observe at hospital)	993
2015-01-20	C (severe dehydration. IV fluids)	710
2015-01-20	C (severe dehydration. IV fluids)	143
2015-01-20	C (severe dehydration. IV fluids)	680
2015-01-20	C (severe dehydration. IV fluids)	183
2015-01-21	ND	1456
2015-01-21	ND	680
2015-01-21	A (no dehydration. Send home with ORS)	568
2015-01-21	B (some dehydration. ORS and observe at hospital)	469
2015-01-21	B (some dehydration. ORS and observe at hospital)	303
2015-01-21	C (severe dehydration. IV fluids)	535
2015-01-22	ND	140
2015-01-22	A (no dehydration. Send home with ORS)	519
2015-01-22	B (some dehydration. ORS and observe at hospital)	40
2015-01-22	B (some dehydration. ORS and observe at hospital)	110
2015-01-22	C (severe dehydration. IV fluids)	517
2015-01-22	C (severe dehydration. IV fluids)	549
2015-01-22	C (severe dehydration. IV fluids)	587
2015-01-23	ND	587
2015-01-23	A (no dehydration. Send home with ORS)	40
2015-01-23	A (no dehydration. Send home with ORS)	607
2015-01-23	C (severe dehydration. IV fluids)	611
2015-01-24	ND	693
2015-01-24	ND	150
2015-01-24	ND	141
2015-01-25	ND	151
2015-01-25	ND	187
2015-01-25	A (no dehydration. Send home with ORS)	40
2015-01-25	C (severe dehydration. IV fluids)	392
2015-01-25	C (severe dehydration. IV fluids)	512
2015-01-25	C (severe dehydration. IV fluids)	611
2015-01-26	ND	1498
2015-01-26	ND	923
2015-01-26	B (some dehydration. ORS and observe at hospital)	205
2015-01-26	B (some dehydration. ORS and observe at hospital)	316
2015-01-26	C (severe dehydration. IV fluids)	175
2015-01-27	B (some dehydration. ORS and observe at hospital)	205
2015-01-27	B (some dehydration. ORS and observe at hospital)	467
2015-01-27	B (some dehydration. ORS and observe at hospital)	304
2015-01-27	C (severe dehydration. IV fluids)	175
2015-01-27	C (severe dehydration. IV fluids)	143
2015-01-27	C (severe dehydration. IV fluids)	751
2015-01-27	C (severe dehydration. IV fluids)	188
2015-01-28	B (some dehydration. ORS and observe at hospital)	321
2015-01-28	C (severe dehydration. IV fluids)	587
2015-01-28	C (severe dehydration. IV fluids)	584
2015-01-28	C (severe dehydration. IV fluids)	509
2015-01-28	C (severe dehydration. IV fluids)	141
2015-01-29	A (no dehydration. Send home with ORS)	540
2015-01-29	A (no dehydration. Send home with ORS)	1323
2015-01-29	A (no dehydration. Send home with ORS)	580
2015-01-29	B (some dehydration. ORS and observe at hospital)	304
2015-01-29	B (some dehydration. ORS and observe at hospital)	1022
2015-01-29	C (severe dehydration. IV fluids)	150
2015-01-29	C (severe dehydration. IV fluids)	584
2015-01-29	C (severe dehydration. IV fluids)	584
2015-01-30	B (some dehydration. ORS and observe at hospital)	ND
2015-01-30	C (severe dehydration. IV fluids)	751
2015-01-30	C (severe dehydration. IV fluids)	183
2015-01-31	A (no dehydration. Send home with ORS)	173
2015-01-31	A (no dehydration. Send home with ORS)	1346
2015-01-31	B (some dehydration. ORS and observe at hospital)	225
2015-01-31	B (some dehydration. ORS and observe at hospital)	247
2015-01-31	C (severe dehydration. IV fluids)	173
2015-01-31	C (severe dehydration. IV fluids)	300
2015-01-31	C (severe dehydration. IV fluids)	173
2015-01-31	C (severe dehydration. IV fluids)	584
2015-02-01	A (no dehydration. Send home with ORS)	611
2015-02-01	A (no dehydration. Send home with ORS)	584
2015-02-01	A (no dehydration. Send home with ORS)	591
2015-02-01	B (some dehydration. ORS and observe at hospital)	663
2015-02-01	B (some dehydration. ORS and observe at hospital)	1016
2015-02-01	B (some dehydration. ORS and observe at hospital)	313
2015-02-01	B (some dehydration. ORS and observe at hospital)	225
2015-02-01	B (some dehydration. ORS and observe at hospital)	313
2015-02-01	B (some dehydration. ORS and observe at hospital)	287
2015-02-01	C (severe dehydration. IV fluids)	339
2015-02-01	C (severe dehydration. IV fluids)	466
2015-02-01	C (severe dehydration. IV fluids)	595
2015-02-02	B (some dehydration. ORS and observe at hospital)	440
2015-02-02	B (some dehydration. ORS and observe at hospital)	195
2015-02-02	C (severe dehydration. IV fluids)	ND
2015-02-03	A (no dehydration. Send home with ORS)	584
2015-02-03	A (no dehydration. Send home with ORS)	498
2015-02-03	B (some dehydration. ORS and observe at hospital)	94
2015-02-03	B (some dehydration. ORS and observe at hospital)	467
2015-02-03	C (severe dehydration. IV fluids)	300
2015-02-03	C (severe dehydration. IV fluids)	531
2015-02-03	C (severe dehydration. IV fluids)	175
2015-02-04	A (no dehydration. Send home with ORS)	558
2015-02-04	A (no dehydration. Send home with ORS)	563
2015-02-04	B (some dehydration. ORS and observe at hospital)	415
2015-02-04	B (some dehydration. ORS and observe at hospital)	436
2015-02-04	B (some dehydration. ORS and observe at hospital)	247
2015-02-04	B (some dehydration. ORS and observe at hospital)	462
2015-02-04	B (some dehydration. ORS and observe at hospital)	205
2015-02-04	C (severe dehydration. IV fluids)	599
2015-02-04	C (severe dehydration. IV fluids)	418
2015-02-04	C (severe dehydration. IV fluids)	43
2015-02-04	C (severe dehydration. IV fluids)	150
2015-02-04	C (severe dehydration. IV fluids)	150
2015-02-04	C (severe dehydration. IV fluids)	563
2015-02-04	C (severe dehydration. IV fluids)	72
2015-02-04	C (severe dehydration. IV fluids)	583
2015-02-04	C (severe dehydration. IV fluids)	159
2015-02-04	C (severe dehydration. IV fluids)	155
2015-02-05	B (some dehydration. ORS and observe at hospital)	588
2015-02-05	C (severe dehydration. IV fluids)	521
2015-02-05	C (severe dehydration. IV fluids)	422
2015-02-05	C (severe dehydration. IV fluids)	324
2015-02-05	C (severe dehydration. IV fluids)	254
2015-02-05	C (severe dehydration. IV fluids)	37
2015-02-06	B (some dehydration. ORS and observe at hospital)	436
2015-02-06	B (some dehydration. ORS and observe at hospital)	315
2015-02-06	B (some dehydration. ORS and observe at hospital)	1183
2015-02-06	B (some dehydration. ORS and observe at hospital)	1338
2015-02-06	C (severe dehydration. IV fluids)	588
2015-02-06	C (severe dehydration. IV fluids)	710
2015-02-06	C (severe dehydration. IV fluids)	64
2015-02-06	C (severe dehydration. IV fluids)	187
2015-02-06	C (severe dehydration. IV fluids)	223
2015-02-06	C (severe dehydration. IV fluids)	583
2015-02-07	B (some dehydration. ORS and observe at hospital)	1030
2015-02-07	B (some dehydration. ORS and observe at hospital)	321
2015-02-07	B (some dehydration. ORS and observe at hospital)	321
2015-02-07	B (some dehydration. ORS and observe at hospital)	504
2015-02-07	C (severe dehydration. IV fluids)	549
2015-02-07	C (severe dehydration. IV fluids)	ND
2015-02-08	A (no dehydration. Send home with ORS)	36
2015-02-08	A (no dehydration. Send home with ORS)	932
2015-02-08	A (no dehydration. Send home with ORS)	556
2015-02-08	B (some dehydration. ORS and observe at hospital)	205
2015-02-08	C (severe dehydration. IV fluids)	463
2015-02-08	C (severe dehydration. IV fluids)	595
2015-02-08	C (severe dehydration. IV fluids)	583
2015-02-09	ND	46
2015-02-09	B (some dehydration. ORS and observe at hospital)	220
2015-02-09	B (some dehydration. ORS and observe at hospital)	225
2015-02-09	B (some dehydration. ORS and observe at hospital)	224
2015-02-09	B (some dehydration. ORS and observe at hospital)	419
2015-02-09	B (some dehydration. ORS and observe at hospital)	415
2015-02-09	B (some dehydration. ORS and observe at hospital)	1195
2015-02-09	B (some dehydration. ORS and observe at hospital)	1195
2015-02-09	B (some dehydration. ORS and observe at hospital)	267
2015-02-09	C (severe dehydration. IV fluids)	500
2015-02-09	C (severe dehydration. IV fluids)	419
2015-02-09	C (severe dehydration. IV fluids)	583
2015-02-09	C (severe dehydration. IV fluids)	681
2015-02-10	A (no dehydration. Send home with ORS)	1276
2015-02-10	A (no dehydration. Send home with ORS)	ND
2015-02-10	A (no dehydration. Send home with ORS)	584
2015-02-10	A (no dehydration. Send home with ORS)	1456
2015-02-10	A (no dehydration. Send home with ORS)	583
2015-02-10	A (no dehydration. Send home with ORS)	1353
2015-02-10	B (some dehydration. ORS and observe at hospital)	467
2015-02-10	B (some dehydration. ORS and observe at hospital)	217
2015-02-10	B (some dehydration. ORS and observe at hospital)	ND
2015-02-10	B (some dehydration. ORS and observe at hospital)	ND
2015-02-10	B (some dehydration. ORS and observe at hospital)	475
2015-02-10	B (some dehydration. ORS and observe at hospital)	1373
2015-02-10	C (severe dehydration. IV fluids)	563
2015-02-10	C (severe dehydration. IV fluids)	48
2015-02-11	A (no dehydration. Send home with ORS)	1456
2015-02-11	B (some dehydration. ORS and observe at hospital)	957
2015-02-11	B (some dehydration. ORS and observe at hospital)	225
2015-02-11	B (some dehydration. ORS and observe at hospital)	237
2015-02-11	C (severe dehydration. IV fluids)	490
2015-02-12	ND	877
2015-02-13	A (no dehydration. Send home with ORS)	593
2015-02-13	A (no dehydration. Send home with ORS)	584
2015-02-13	A (no dehydration. Send home with ORS)	173
2015-02-13	B (some dehydration. ORS and observe at hospital)	224
2015-02-13	B (some dehydration. ORS and observe at hospital)	563
2015-02-13	C (severe dehydration. IV fluids)	424
2015-02-13	C (severe dehydration. IV fluids)	514
2015-02-14	A (no dehydration. Send home with ORS)	510
2015-02-14	A (no dehydration. Send home with ORS)	625
2015-02-14	B (some dehydration. ORS and observe at hospital)	302
2015-02-14	B (some dehydration. ORS and observe at hospital)	225
2015-02-14	B (some dehydration. ORS and observe at hospital)	230
2015-02-14	B (some dehydration. ORS and observe at hospital)	467
2015-02-14	B (some dehydration. ORS and observe at hospital)	1033
2015-02-14	B (some dehydration. ORS and observe at hospital)	1083
2015-02-14	C (severe dehydration. IV fluids)	588
2015-02-15	A (no dehydration. Send home with ORS)	583
2015-02-15	A (no dehydration. Send home with ORS)	205
2015-02-15	B (some dehydration. ORS and observe at hospital)	831
2015-02-15	C (severe dehydration. IV fluids)	500
2015-02-15	C (severe dehydration. IV fluids)	39
2015-02-15	C (severe dehydration. IV fluids)	313
2015-02-15	C (severe dehydration. IV fluids)	611
2015-02-16	A (no dehydration. Send home with ORS)	1229
2015-02-16	B (some dehydration. ORS and observe at hospital)	296
2015-02-16	B (some dehydration. ORS and observe at hospital)	313
2015-02-16	B (some dehydration. ORS and observe at hospital)	296
2015-02-16	C (severe dehydration. IV fluids)	69
2015-02-16	C (severe dehydration. IV fluids)	524
2015-02-17	A (no dehydration. Send home with ORS)	587
2015-02-17	A (no dehydration. Send home with ORS)	1351
2015-02-17	B (some dehydration. ORS and observe at hospital)	1096
2015-02-17	B (some dehydration. ORS and observe at hospital)	221
2015-02-17	B (some dehydration. ORS and observe at hospital)	289
2015-02-17	B (some dehydration. ORS and observe at hospital)	241
2015-02-17	B (some dehydration. ORS and observe at hospital)	289
2015-02-17	B (some dehydration. ORS and observe at hospital)	1032
2015-02-17	B (some dehydration. ORS and observe at hospital)	1096
2015-02-17	C (severe dehydration. IV fluids)	584
2015-02-17	C (severe dehydration. IV fluids)	511
2015-02-18	A (no dehydration. Send home with ORS)	1338
2015-02-18	A (no dehydration. Send home with ORS)	561
2015-02-18	A (no dehydration. Send home with ORS)	599
2015-02-18	A (no dehydration. Send home with ORS)	69
2015-02-18	B (some dehydration. ORS and observe at hospital)	304
2015-02-18	B (some dehydration. ORS and observe at hospital)	225
2015-02-18	B (some dehydration. ORS and observe at hospital)	288
2015-02-18	C (severe dehydration. IV fluids)	549
2015-02-18	C (severe dehydration. IV fluids)	531
2015-02-19	A (no dehydration. Send home with ORS)	595
2015-02-19	A (no dehydration. Send home with ORS)	611
2015-02-19	B (some dehydration. ORS and observe at hospital)	287
2015-02-19	B (some dehydration. ORS and observe at hospital)	205
2015-02-19	B (some dehydration. ORS and observe at hospital)	287
2015-02-19	C (severe dehydration. IV fluids)	521
2015-02-19	C (severe dehydration. IV fluids)	622
2015-02-19	C (severe dehydration. IV fluids)	500
2015-02-19	C (severe dehydration. IV fluids)	590
2015-02-20	A (no dehydration. Send home with ORS)	584
2015-02-20	B (some dehydration. ORS and observe at hospital)	205
2015-02-20	B (some dehydration. ORS and observe at hospital)	205
2015-02-20	B (some dehydration. ORS and observe at hospital)	205
2015-02-20	B (some dehydration. ORS and observe at hospital)	205
2015-02-20	B (some dehydration. ORS and observe at hospital)	288
2015-02-20	B (some dehydration. ORS and observe at hospital)	241
2015-02-20	B (some dehydration. ORS and observe at hospital)	287
2015-02-20	B (some dehydration. ORS and observe at hospital)	205
2015-02-20	B (some dehydration. ORS and observe at hospital)	205
2015-02-20	C (severe dehydration. IV fluids)	549
2015-02-20	C (severe dehydration. IV fluids)	518
2015-02-20	C (severe dehydration. IV fluids)	183
2015-02-21	A (no dehydration. Send home with ORS)	1326
2015-02-21	A (no dehydration. Send home with ORS)	588
2015-02-21	A (no dehydration. Send home with ORS)	1345
2015-02-21	A (no dehydration. Send home with ORS)	524
2015-02-21	A (no dehydration. Send home with ORS)	639
2015-02-21	A (no dehydration. Send home with ORS)	549
2015-02-21	A (no dehydration. Send home with ORS)	174
2015-02-21	B (some dehydration. ORS and observe at hospital)	287
2015-02-21	B (some dehydration. ORS and observe at hospital)	1050
2015-02-21	B (some dehydration. ORS and observe at hospital)	288
2015-02-21	B (some dehydration. ORS and observe at hospital)	289
2015-02-21	B (some dehydration. ORS and observe at hospital)	205
2015-02-21	B (some dehydration. ORS and observe at hospital)	531
2015-02-21	B (some dehydration. ORS and observe at hospital)	221
2015-02-21	B (some dehydration. ORS and observe at hospital)	268
2015-02-21	C (severe dehydration. IV fluids)	ND
2015-02-21	C (severe dehydration. IV fluids)	1266
2015-02-21	C (severe dehydration. IV fluids)	583
2015-02-22	A (no dehydration. Send home with ORS)	711
2015-02-22	A (no dehydration. Send home with ORS)	1338
2015-02-22	A (no dehydration. Send home with ORS)	141
2015-02-22	B (some dehydration. ORS and observe at hospital)	1080
2015-02-22	B (some dehydration. ORS and observe at hospital)	1058
2015-02-22	B (some dehydration. ORS and observe at hospital)	1206
2015-02-22	C (severe dehydration. IV fluids)	158
2015-02-22	C (severe dehydration. IV fluids)	171
2015-02-23	A (no dehydration. Send home with ORS)	521
2015-02-23	A (no dehydration. Send home with ORS)	495
2015-02-23	B (some dehydration. ORS and observe at hospital)	287
2015-02-23	B (some dehydration. ORS and observe at hospital)	302
2015-02-23	B (some dehydration. ORS and observe at hospital)	199
2015-02-23	B (some dehydration. ORS and observe at hospital)	313
2015-02-23	C (severe dehydration. IV fluids)	495
2015-02-23	C (severe dehydration. IV fluids)	190
2015-02-24	A (no dehydration. Send home with ORS)	579
2015-02-24	B (some dehydration. ORS and observe at hospital)	599
2015-02-24	B (some dehydration. ORS and observe at hospital)	225
2015-02-24	B (some dehydration. ORS and observe at hospital)	ND
2015-02-24	B (some dehydration. ORS and observe at hospital)	287
2015-02-24	B (some dehydration. ORS and observe at hospital)	300
2015-02-24	B (some dehydration. ORS and observe at hospital)	316
2015-02-24	B (some dehydration. ORS and observe at hospital)	1022
2015-02-24	B (some dehydration. ORS and observe at hospital)	302
2015-02-24	B (some dehydration. ORS and observe at hospital)	272
2015-02-24	B (some dehydration. ORS and observe at hospital)	268
2015-02-24	C (severe dehydration. IV fluids)	324
2015-02-24	C (severe dehydration. IV fluids)	312
2015-02-24	C (severe dehydration. IV fluids)	110
2015-02-25	A (no dehydration. Send home with ORS)	1337
2015-02-25	A (no dehydration. Send home with ORS)	518
2015-02-25	A (no dehydration. Send home with ORS)	173
2015-02-25	A (no dehydration. Send home with ORS)	514
2015-02-25	B (some dehydration. ORS and observe at hospital)	1036
2015-02-25	B (some dehydration. ORS and observe at hospital)	268
2015-02-25	B (some dehydration. ORS and observe at hospital)	1022
2015-02-25	B (some dehydration. ORS and observe at hospital)	1406
2015-02-26	ND	68
2015-02-26	B (some dehydration. ORS and observe at hospital)	259
2015-02-26	B (some dehydration. ORS and observe at hospital)	1033
2015-02-26	B (some dehydration. ORS and observe at hospital)	151
2015-02-26	B (some dehydration. ORS and observe at hospital)	685
2015-02-26	B (some dehydration. ORS and observe at hospital)	287
2015-02-26	C (severe dehydration. IV fluids)	173
2015-02-27	ND	ND
2015-02-27	ND	ND
2015-02-27	A (no dehydration. Send home with ORS)	150
2015-02-27	A (no dehydration. Send home with ORS)	1480
2015-02-27	A (no dehydration. Send home with ORS)	705
2015-02-27	B (some dehydration. ORS and observe at hospital)	304
2015-02-27	B (some dehydration. ORS and observe at hospital)	287
2015-02-27	B (some dehydration. ORS and observe at hospital)	175
2015-02-27	C (severe dehydration. IV fluids)	139
2015-02-27	C (severe dehydration. IV fluids)	241
2015-02-27	C (severe dehydration. IV fluids)	265
2015-02-27	C (severe dehydration. IV fluids)	681
2015-02-28	B (some dehydration. ORS and observe at hospital)	321
2015-02-28	B (some dehydration. ORS and observe at hospital)	268
2015-02-28	B (some dehydration. ORS and observe at hospital)	316
2015-02-28	B (some dehydration. ORS and observe at hospital)	259
2015-02-28	B (some dehydration. ORS and observe at hospital)	241
2015-03-01	A (no dehydration. Send home with ORS)	161
2015-03-01	A (no dehydration. Send home with ORS)	568
2015-03-01	B (some dehydration. ORS and observe at hospital)	287
2015-03-01	B (some dehydration. ORS and observe at hospital)	217
2015-03-01	B (some dehydration. ORS and observe at hospital)	321
2015-03-01	B (some dehydration. ORS and observe at hospital)	268
2015-03-01	C (severe dehydration. IV fluids)	599
2015-03-01	C (severe dehydration. IV fluids)	137
2015-03-01	C (severe dehydration. IV fluids)	135
2015-03-01	C (severe dehydration. IV fluids)	130
2015-03-01	C (severe dehydration. IV fluids)	669
2015-03-01	C (severe dehydration. IV fluids)	128
2015-03-01	C (severe dehydration. IV fluids)	578
2015-03-01	C (severe dehydration. IV fluids)	500
2015-03-02	B (some dehydration. ORS and observe at hospital)	ND
2015-03-02	B (some dehydration. ORS and observe at hospital)	259
2015-03-02	B (some dehydration. ORS and observe at hospital)	300
2015-03-02	B (some dehydration. ORS and observe at hospital)	1024
2015-03-02	B (some dehydration. ORS and observe at hospital)	686
2015-03-02	B (some dehydration. ORS and observe at hospital)	287
2015-03-02	B (some dehydration. ORS and observe at hospital)	205
2015-03-02	B (some dehydration. ORS and observe at hospital)	1022
2015-03-02	B (some dehydration. ORS and observe at hospital)	954
2015-03-02	B (some dehydration. ORS and observe at hospital)	205
2015-03-02	B (some dehydration. ORS and observe at hospital)	591
2015-03-02	C (severe dehydration. IV fluids)	657
2015-03-03	A (no dehydration. Send home with ORS)	477
2015-03-03	A (no dehydration. Send home with ORS)	987
2015-03-03	A (no dehydration. Send home with ORS)	627
2015-03-03	B (some dehydration. ORS and observe at hospital)	1062
2015-03-03	B (some dehydration. ORS and observe at hospital)	460
2015-03-03	B (some dehydration. ORS and observe at hospital)	289
2015-03-03	C (severe dehydration. IV fluids)	698
2015-03-03	C (severe dehydration. IV fluids)	145
2015-03-04	A (no dehydration. Send home with ORS)	187
2015-03-04	B (some dehydration. ORS and observe at hospital)	322
2015-03-04	C (severe dehydration. IV fluids)	129
2015-03-04	C (severe dehydration. IV fluids)	132
2015-03-05	B (some dehydration. ORS and observe at hospital)	ND
2015-03-05	B (some dehydration. ORS and observe at hospital)	223
2015-03-05	B (some dehydration. ORS and observe at hospital)	205
2015-03-05	B (some dehydration. ORS and observe at hospital)	287
2015-03-05	C (severe dehydration. IV fluids)	637
2015-03-05	C (severe dehydration. IV fluids)	601
2015-03-06	B (some dehydration. ORS and observe at hospital)	205
2015-03-06	B (some dehydration. ORS and observe at hospital)	225
2015-03-06	B (some dehydration. ORS and observe at hospital)	165
2015-03-06	B (some dehydration. ORS and observe at hospital)	171
2015-03-06	C (severe dehydration. IV fluids)	ND
2015-03-06	C (severe dehydration. IV fluids)	ND
2015-03-06	C (severe dehydration. IV fluids)	187
2015-03-06	C (severe dehydration. IV fluids)	515
2015-03-06	C (severe dehydration. IV fluids)	ND
2015-03-06	C (severe dehydration. IV fluids)	ND
2015-03-06	C (severe dehydration. IV fluids)	ND
2015-03-06	C (severe dehydration. IV fluids)	500
2015-03-06	C (severe dehydration. IV fluids)	ND
2015-03-07	A (no dehydration. Send home with ORS)	531
2015-03-07	B (some dehydration. ORS and observe at hospital)	210
2015-03-07	B (some dehydration. ORS and observe at hospital)	ND
2015-03-07	B (some dehydration. ORS and observe at hospital)	624
2015-03-07	B (some dehydration. ORS and observe at hospital)	145
2015-03-07	B (some dehydration. ORS and observe at hospital)	1382
2015-03-07	B (some dehydration. ORS and observe at hospital)	175
2015-03-07	B (some dehydration. ORS and observe at hospital)	260
2015-03-07	C (severe dehydration. IV fluids)	241
2015-03-07	C (severe dehydration. IV fluids)	141
2015-03-08	B (some dehydration. ORS and observe at hospital)	637
2015-03-08	B (some dehydration. ORS and observe at hospital)	215
2015-03-08	B (some dehydration. ORS and observe at hospital)	175
2015-03-08	B (some dehydration. ORS and observe at hospital)	587
2015-03-09	A (no dehydration. Send home with ORS)	959
2015-03-09	A (no dehydration. Send home with ORS)	187
2015-03-09	A (no dehydration. Send home with ORS)	175
2015-03-09	B (some dehydration. ORS and observe at hospital)	188
2015-03-09	C (severe dehydration. IV fluids)	260
2015-03-09	C (severe dehydration. IV fluids)	323
2015-03-09	C (severe dehydration. IV fluids)	ND
2015-03-09	C (severe dehydration. IV fluids)	134
2015-03-09	C (severe dehydration. IV fluids)	647
2015-03-09	C (severe dehydration. IV fluids)	681
2015-03-10	B (some dehydration. ORS and observe at hospital)	220
2015-03-10	B (some dehydration. ORS and observe at hospital)	990
2015-03-10	B (some dehydration. ORS and observe at hospital)	260
2015-03-10	B (some dehydration. ORS and observe at hospital)	260
2015-03-10	B (some dehydration. ORS and observe at hospital)	260
2015-03-10	B (some dehydration. ORS and observe at hospital)	217
2015-03-10	C (severe dehydration. IV fluids)	175
2015-03-10	C (severe dehydration. IV fluids)	189
2015-03-10	C (severe dehydration. IV fluids)	709
2015-03-11	A (no dehydration. Send home with ORS)	173
2015-03-11	B (some dehydration. ORS and observe at hospital)	260
2015-03-11	B (some dehydration. ORS and observe at hospital)	1008
2015-03-11	B (some dehydration. ORS and observe at hospital)	260
2015-03-11	B (some dehydration. ORS and observe at hospital)	323
2015-03-11	B (some dehydration. ORS and observe at hospital)	321
2015-03-11	C (severe dehydration. IV fluids)	193
2015-03-11	C (severe dehydration. IV fluids)	150
2015-03-11	C (severe dehydration. IV fluids)	175
2015-03-12	B (some dehydration. ORS and observe at hospital)	324
2015-03-12	B (some dehydration. ORS and observe at hospital)	297
2015-03-12	B (some dehydration. ORS and observe at hospital)	260
2015-03-12	B (some dehydration. ORS and observe at hospital)	1407
2015-03-12	B (some dehydration. ORS and observe at hospital)	305
2015-03-12	B (some dehydration. ORS and observe at hospital)	260
2015-03-12	B (some dehydration. ORS and observe at hospital)	260
2015-03-12	B (some dehydration. ORS and observe at hospital)	220
2015-03-12	B (some dehydration. ORS and observe at hospital)	241
2015-03-13	B (some dehydration. ORS and observe at hospital)	ND
2015-03-13	B (some dehydration. ORS and observe at hospital)	ND
2015-03-13	B (some dehydration. ORS and observe at hospital)	260
2015-03-13	B (some dehydration. ORS and observe at hospital)	324
2015-03-13	B (some dehydration. ORS and observe at hospital)	262
2015-03-13	B (some dehydration. ORS and observe at hospital)	262
2015-03-14	A (no dehydration. Send home with ORS)	503
2015-03-14	A (no dehydration. Send home with ORS)	1403
2015-03-14	B (some dehydration. ORS and observe at hospital)	260
2015-03-14	B (some dehydration. ORS and observe at hospital)	1008
2015-03-14	B (some dehydration. ORS and observe at hospital)	241
2015-03-14	C (severe dehydration. IV fluids)	370
2015-03-15	B (some dehydration. ORS and observe at hospital)	323
2015-03-15	B (some dehydration. ORS and observe at hospital)	1077
2015-03-15	B (some dehydration. ORS and observe at hospital)	260
2015-03-15	B (some dehydration. ORS and observe at hospital)	300
2015-03-15	B (some dehydration. ORS and observe at hospital)	323
2015-03-15	B (some dehydration. ORS and observe at hospital)	225
2015-03-15	B (some dehydration. ORS and observe at hospital)	304
2015-03-15	C (severe dehydration. IV fluids)	275
2015-03-16	B (some dehydration. ORS and observe at hospital)	311
2015-03-16	B (some dehydration. ORS and observe at hospital)	262
2015-03-16	B (some dehydration. ORS and observe at hospital)	311
2015-03-16	B (some dehydration. ORS and observe at hospital)	241
2015-03-16	B (some dehydration. ORS and observe at hospital)	229
2015-03-16	B (some dehydration. ORS and observe at hospital)	225
2015-03-17	A (no dehydration. Send home with ORS)	599
2015-03-17	A (no dehydration. Send home with ORS)	965
2015-03-17	A (no dehydration. Send home with ORS)	190
2015-03-17	B (some dehydration. ORS and observe at hospital)	143
2015-03-17	B (some dehydration. ORS and observe at hospital)	323
2015-03-17	B (some dehydration. ORS and observe at hospital)	321
2015-03-17	B (some dehydration. ORS and observe at hospital)	289
2015-03-17	B (some dehydration. ORS and observe at hospital)	141
2015-03-17	B (some dehydration. ORS and observe at hospital)	260
2015-03-17	B (some dehydration. ORS and observe at hospital)	224
2015-03-17	B (some dehydration. ORS and observe at hospital)	1045
2015-03-17	B (some dehydration. ORS and observe at hospital)	225
2015-03-17	B (some dehydration. ORS and observe at hospital)	1045
2015-03-17	B (some dehydration. ORS and observe at hospital)	583
2015-03-17	C (severe dehydration. IV fluids)	610
2015-03-18	ND	740
2015-03-18	B (some dehydration. ORS and observe at hospital)	161
2015-03-18	B (some dehydration. ORS and observe at hospital)	277
2015-03-18	B (some dehydration. ORS and observe at hospital)	143
2015-03-18	B (some dehydration. ORS and observe at hospital)	260
2015-03-18	B (some dehydration. ORS and observe at hospital)	205
2015-03-19	A (no dehydration. Send home with ORS)	973
2015-03-19	B (some dehydration. ORS and observe at hospital)	1032
2015-03-19	B (some dehydration. ORS and observe at hospital)	289
2015-03-19	B (some dehydration. ORS and observe at hospital)	262
2015-03-19	B (some dehydration. ORS and observe at hospital)	227
2015-03-19	B (some dehydration. ORS and observe at hospital)	205
2015-03-19	B (some dehydration. ORS and observe at hospital)	321
2015-03-19	B (some dehydration. ORS and observe at hospital)	321
2015-03-19	B (some dehydration. ORS and observe at hospital)	1045
2015-03-20	A (no dehydration. Send home with ORS)	500
2015-03-20	B (some dehydration. ORS and observe at hospital)	1045
2015-03-20	B (some dehydration. ORS and observe at hospital)	1050
2015-03-20	B (some dehydration. ORS and observe at hospital)	1101
2015-03-20	B (some dehydration. ORS and observe at hospital)	459
2015-03-20	B (some dehydration. ORS and observe at hospital)	1045
2015-03-20	B (some dehydration. ORS and observe at hospital)	68
2015-03-20	B (some dehydration. ORS and observe at hospital)	289
2015-03-20	B (some dehydration. ORS and observe at hospital)	645
2015-03-20	B (some dehydration. ORS and observe at hospital)	645
2015-03-20	B (some dehydration. ORS and observe at hospital)	241
2015-03-20	B (some dehydration. ORS and observe at hospital)	321
2015-03-20	C (severe dehydration. IV fluids)	ND
2015-03-21	A (no dehydration. Send home with ORS)	93
2015-03-21	A (no dehydration. Send home with ORS)	945
2015-03-21	B (some dehydration. ORS and observe at hospital)	221
2015-03-21	B (some dehydration. ORS and observe at hospital)	940
2015-03-21	B (some dehydration. ORS and observe at hospital)	289
2015-03-21	B (some dehydration. ORS and observe at hospital)	224
2015-03-21	C (severe dehydration. IV fluids)	178
2015-03-21	C (severe dehydration. IV fluids)	224
2015-03-21	C (severe dehydration. IV fluids)	636
2015-03-22	A (no dehydration. Send home with ORS)	1377
2015-03-22	A (no dehydration. Send home with ORS)	1252
2015-03-22	A (no dehydration. Send home with ORS)	1327
2015-03-22	A (no dehydration. Send home with ORS)	591
2015-03-22	B (some dehydration. ORS and observe at hospital)	205
2015-03-22	B (some dehydration. ORS and observe at hospital)	275
2015-03-22	B (some dehydration. ORS and observe at hospital)	323
2015-03-22	B (some dehydration. ORS and observe at hospital)	ND
2015-03-22	B (some dehydration. ORS and observe at hospital)	224
2015-03-22	B (some dehydration. ORS and observe at hospital)	287
2015-03-22	B (some dehydration. ORS and observe at hospital)	224
2015-03-22	B (some dehydration. ORS and observe at hospital)	323
2015-03-22	B (some dehydration. ORS and observe at hospital)	249
2015-03-22	B (some dehydration. ORS and observe at hospital)	225
2015-03-22	B (some dehydration. ORS and observe at hospital)	241
2015-03-22	C (severe dehydration. IV fluids)	324
2015-03-22	C (severe dehydration. IV fluids)	751
2015-03-23	A (no dehydration. Send home with ORS)	978
2015-03-23	B (some dehydration. ORS and observe at hospital)	262
2015-03-23	B (some dehydration. ORS and observe at hospital)	241
2015-03-23	B (some dehydration. ORS and observe at hospital)	289
2015-03-23	B (some dehydration. ORS and observe at hospital)	205
2015-03-23	C (severe dehydration. IV fluids)	583
2015-03-23	C (severe dehydration. IV fluids)	582
2015-03-25	A (no dehydration. Send home with ORS)	621
2015-03-25	B (some dehydration. ORS and observe at hospital)	1022
2015-03-25	B (some dehydration. ORS and observe at hospital)	ND
2015-03-25	C (severe dehydration. IV fluids)	106
2015-03-26	A (no dehydration. Send home with ORS)	582
2015-03-26	B (some dehydration. ORS and observe at hospital)	300
2015-03-26	B (some dehydration. ORS and observe at hospital)	287
2015-03-26	B (some dehydration. ORS and observe at hospital)	223
2015-03-26	B (some dehydration. ORS and observe at hospital)	569
2015-03-26	B (some dehydration. ORS and observe at hospital)	287
2015-03-26	B (some dehydration. ORS and observe at hospital)	637
2015-03-26	B (some dehydration. ORS and observe at hospital)	305
2015-03-26	B (some dehydration. ORS and observe at hospital)	241
2015-03-26	B (some dehydration. ORS and observe at hospital)	223
2015-03-26	C (severe dehydration. IV fluids)	96
2015-03-26	C (severe dehydration. IV fluids)	597
2015-03-27	B (some dehydration. ORS and observe at hospital)	221
2015-03-27	B (some dehydration. ORS and observe at hospital)	490
2015-03-27	B (some dehydration. ORS and observe at hospital)	300
2015-03-27	B (some dehydration. ORS and observe at hospital)	226
2015-03-27	B (some dehydration. ORS and observe at hospital)	221
2015-03-27	B (some dehydration. ORS and observe at hospital)	226
2015-03-27	B (some dehydration. ORS and observe at hospital)	226
2015-03-27	C (severe dehydration. IV fluids)	569
2015-03-28	A (no dehydration. Send home with ORS)	543
2015-03-28	A (no dehydration. Send home with ORS)	569
2015-03-28	A (no dehydration. Send home with ORS)	1385
2015-03-28	A (no dehydration. Send home with ORS)	1309
2015-03-28	B (some dehydration. ORS and observe at hospital)	268
2015-03-28	B (some dehydration. ORS and observe at hospital)	626
2015-03-28	B (some dehydration. ORS and observe at hospital)	225
2015-03-28	C (severe dehydration. IV fluids)	597
2015-03-29	A (no dehydration. Send home with ORS)	531
2015-03-29	A (no dehydration. Send home with ORS)	528
2015-03-29	A (no dehydration. Send home with ORS)	594
2015-03-29	A (no dehydration. Send home with ORS)	490
2015-03-29	B (some dehydration. ORS and observe at hospital)	188
2015-03-29	B (some dehydration. ORS and observe at hospital)	703
2015-03-29	B (some dehydration. ORS and observe at hospital)	206
2015-03-29	B (some dehydration. ORS and observe at hospital)	287
2015-03-29	B (some dehydration. ORS and observe at hospital)	241
2015-03-29	C (severe dehydration. IV fluids)	504
2015-03-29	C (severe dehydration. IV fluids)	287
2015-03-30	A (no dehydration. Send home with ORS)	546
2015-03-30	A (no dehydration. Send home with ORS)	546
2015-03-30	A (no dehydration. Send home with ORS)	1490
2015-03-30	B (some dehydration. ORS and observe at hospital)	145
2015-03-30	B (some dehydration. ORS and observe at hospital)	211
2015-03-30	B (some dehydration. ORS and observe at hospital)	241
2015-03-30	B (some dehydration. ORS and observe at hospital)	1055
2015-03-30	B (some dehydration. ORS and observe at hospital)	40
2015-03-30	B (some dehydration. ORS and observe at hospital)	217
2015-03-30	B (some dehydration. ORS and observe at hospital)	1490
2015-03-30	B (some dehydration. ORS and observe at hospital)	305
2015-03-30	B (some dehydration. ORS and observe at hospital)	1544
2015-03-30	B (some dehydration. ORS and observe at hospital)	221
2015-03-30	B (some dehydration. ORS and observe at hospital)	225
2015-03-30	C (severe dehydration. IV fluids)	751
2015-03-30	C (severe dehydration. IV fluids)	ND
2015-03-31	A (no dehydration. Send home with ORS)	583
2015-03-31	A (no dehydration. Send home with ORS)	558
2015-03-31	B (some dehydration. ORS and observe at hospital)	1055
2015-03-31	B (some dehydration. ORS and observe at hospital)	1073
2015-03-31	B (some dehydration. ORS and observe at hospital)	294
2015-03-31	B (some dehydration. ORS and observe at hospital)	221
2015-04-01	A (no dehydration. Send home with ORS)	1381
2015-04-01	A (no dehydration. Send home with ORS)	766
2015-04-01	A (no dehydration. Send home with ORS)	512
2015-04-01	A (no dehydration. Send home with ORS)	563
2015-04-01	A (no dehydration. Send home with ORS)	512
2015-04-01	B (some dehydration. ORS and observe at hospital)	220
2015-04-01	B (some dehydration. ORS and observe at hospital)	957
2015-04-01	B (some dehydration. ORS and observe at hospital)	221
2015-04-01	B (some dehydration. ORS and observe at hospital)	ND
2015-04-01	B (some dehydration. ORS and observe at hospital)	255
2015-04-01	B (some dehydration. ORS and observe at hospital)	287
2015-04-01	B (some dehydration. ORS and observe at hospital)	626
2015-04-01	B (some dehydration. ORS and observe at hospital)	205
2015-04-01	C (severe dehydration. IV fluids)	193
2015-04-01	C (severe dehydration. IV fluids)	199
2015-04-01	C (severe dehydration. IV fluids)	ND
2015-04-01	C (severe dehydration. IV fluids)	606
2015-04-01	C (severe dehydration. IV fluids)	566
2015-04-02	B (some dehydration. ORS and observe at hospital)	ND
2015-04-02	B (some dehydration. ORS and observe at hospital)	ND
2015-04-02	C (severe dehydration. IV fluids)	ND
2015-04-03	B (some dehydration. ORS and observe at hospital)	1036
2015-04-03	B (some dehydration. ORS and observe at hospital)	262
2015-04-03	B (some dehydration. ORS and observe at hospital)	1000
2015-04-03	C (severe dehydration. IV fluids)	ND
2015-04-04	A (no dehydration. Send home with ORS)	597
2015-04-04	A (no dehydration. Send home with ORS)	490
2015-04-04	A (no dehydration. Send home with ORS)	36
2015-04-04	A (no dehydration. Send home with ORS)	477
2015-04-04	C (severe dehydration. IV fluids)	699
2015-04-05	A (no dehydration. Send home with ORS)	36
2015-04-05	A (no dehydration. Send home with ORS)	512
2015-04-05	B (some dehydration. ORS and observe at hospital)	187
2015-04-05	B (some dehydration. ORS and observe at hospital)	205
2015-04-05	B (some dehydration. ORS and observe at hospital)	287
2015-04-05	B (some dehydration. ORS and observe at hospital)	223
2015-04-05	B (some dehydration. ORS and observe at hospital)	205
2015-04-07	B (some dehydration. ORS and observe at hospital)	1344
2015-04-07	C (severe dehydration. IV fluids)	141
2015-04-08	A (no dehydration. Send home with ORS)	268
2015-04-08	B (some dehydration. ORS and observe at hospital)	1022
2015-04-08	B (some dehydration. ORS and observe at hospital)	40
2015-04-08	B (some dehydration. ORS and observe at hospital)	205
2015-04-08	B (some dehydration. ORS and observe at hospital)	262
2015-04-08	B (some dehydration. ORS and observe at hospital)	221
2015-04-09	B (some dehydration. ORS and observe at hospital)	272
2015-04-09	B (some dehydration. ORS and observe at hospital)	701
2015-04-09	B (some dehydration. ORS and observe at hospital)	302
2015-04-09	C (severe dehydration. IV fluids)	704
2015-04-13	B (some dehydration. ORS and observe at hospital)	1061
2015-04-13	B (some dehydration. ORS and observe at hospital)	271
2015-04-13	B (some dehydration. ORS and observe at hospital)	984
2015-04-13	B (some dehydration. ORS and observe at hospital)	1022
2015-04-13	C (severe dehydration. IV fluids)	151
2015-04-14	A (no dehydration. Send home with ORS)	593
2015-04-14	A (no dehydration. Send home with ORS)	290
2015-04-14	A (no dehydration. Send home with ORS)	1339
2015-04-14	B (some dehydration. ORS and observe at hospital)	679
2015-04-14	B (some dehydration. ORS and observe at hospital)	475
2015-04-15	A (no dehydration. Send home with ORS)	597
2015-04-15	B (some dehydration. ORS and observe at hospital)	1040
2015-04-15	B (some dehydration. ORS and observe at hospital)	224
2015-04-15	B (some dehydration. ORS and observe at hospital)	1103
2015-04-15	B (some dehydration. ORS and observe at hospital)	1448
2015-04-15	B (some dehydration. ORS and observe at hospital)	631
2015-04-16	A (no dehydration. Send home with ORS)	500
2015-04-16	A (no dehydration. Send home with ORS)	569
2015-04-16	B (some dehydration. ORS and observe at hospital)	282
2015-04-16	B (some dehydration. ORS and observe at hospital)	ND
2015-04-16	B (some dehydration. ORS and observe at hospital)	187
2015-04-17	A (no dehydration. Send home with ORS)	524
2015-04-17	B (some dehydration. ORS and observe at hospital)	321
2015-04-17	B (some dehydration. ORS and observe at hospital)	225
2015-04-17	B (some dehydration. ORS and observe at hospital)	554
2015-04-17	C (severe dehydration. IV fluids)	573
2015-04-18	A (no dehydration. Send home with ORS)	591
2015-04-18	B (some dehydration. ORS and observe at hospital)	227
2015-04-18	C (severe dehydration. IV fluids)	151
2015-04-19	A (no dehydration. Send home with ORS)	577
2015-04-19	B (some dehydration. ORS and observe at hospital)	635
2015-04-19	B (some dehydration. ORS and observe at hospital)	39
2015-04-19	B (some dehydration. ORS and observe at hospital)	221
2015-04-19	B (some dehydration. ORS and observe at hospital)	195
2015-04-19	B (some dehydration. ORS and observe at hospital)	316
2015-04-19	B (some dehydration. ORS and observe at hospital)	321
2015-04-19	C (severe dehydration. IV fluids)	195
2015-04-20	ND	536
2015-04-20	ND	1288
2015-04-20	ND	490
2015-04-20	ND	605
2015-04-20	B (some dehydration. ORS and observe at hospital)	151
2015-04-20	B (some dehydration. ORS and observe at hospital)	202
2015-04-20	B (some dehydration. ORS and observe at hospital)	319
2015-04-20	C (severe dehydration. IV fluids)	151
2015-04-21	ND	1288
2015-04-21	A (no dehydration. Send home with ORS)	704
2015-04-21	B (some dehydration. ORS and observe at hospital)	195
2015-04-21	B (some dehydration. ORS and observe at hospital)	151
2015-04-21	B (some dehydration. ORS and observe at hospital)	302
2015-04-21	B (some dehydration. ORS and observe at hospital)	143
2015-04-21	B (some dehydration. ORS and observe at hospital)	171
2015-04-21	B (some dehydration. ORS and observe at hospital)	143
2015-04-21	C (severe dehydration. IV fluids)	290
2015-04-21	C (severe dehydration. IV fluids)	311
2015-04-22	A (no dehydration. Send home with ORS)	143
2015-04-22	A (no dehydration. Send home with ORS)	589
2015-04-22	A (no dehydration. Send home with ORS)	584
2015-04-22	B (some dehydration. ORS and observe at hospital)	224
2015-04-22	B (some dehydration. ORS and observe at hospital)	370
2015-04-23	B (some dehydration. ORS and observe at hospital)	316
2015-04-23	B (some dehydration. ORS and observe at hospital)	202
2015-04-24	A (no dehydration. Send home with ORS)	1116
2015-04-24	A (no dehydration. Send home with ORS)	531
2015-04-24	A (no dehydration. Send home with ORS)	495
2015-04-24	A (no dehydration. Send home with ORS)	1116
2015-04-24	A (no dehydration. Send home with ORS)	1116
2015-04-24	A (no dehydration. Send home with ORS)	524
2015-04-24	A (no dehydration. Send home with ORS)	1116
2015-04-24	A (no dehydration. Send home with ORS)	514
2015-04-24	A (no dehydration. Send home with ORS)	1116
2015-04-24	A (no dehydration. Send home with ORS)	1116
2015-04-24	C (severe dehydration. IV fluids)	634
2015-04-24	C (severe dehydration. IV fluids)	1116
2015-04-24	C (severe dehydration. IV fluids)	1116
2015-04-24	C (severe dehydration. IV fluids)	636
2015-04-25	A (no dehydration. Send home with ORS)	611
2015-04-25	A (no dehydration. Send home with ORS)	500
2015-04-25	B (some dehydration. ORS and observe at hospital)	1040
2015-04-25	B (some dehydration. ORS and observe at hospital)	289
2015-04-25	B (some dehydration. ORS and observe at hospital)	324
2015-04-25	B (some dehydration. ORS and observe at hospital)	263
2015-04-25	B (some dehydration. ORS and observe at hospital)	441
2015-04-25	C (severe dehydration. IV fluids)	ND
2015-04-26	A (no dehydration. Send home with ORS)	537
2015-04-26	B (some dehydration. ORS and observe at hospital)	ND
2015-04-26	B (some dehydration. ORS and observe at hospital)	206
2015-04-26	C (severe dehydration. IV fluids)	517
2015-04-27	A (no dehydration. Send home with ORS)	1288
2015-04-27	A (no dehydration. Send home with ORS)	597
2015-04-27	A (no dehydration. Send home with ORS)	490
2015-04-27	B (some dehydration. ORS and observe at hospital)	ND
2015-04-27	C (severe dehydration. IV fluids)	408
2015-04-28	ND	481
2015-04-28	ND	ND
2015-04-28	ND	1350
2015-04-28	ND	477
2015-04-28	A (no dehydration. Send home with ORS)	684
2015-04-28	B (some dehydration. ORS and observe at hospital)	706
2015-04-28	C (severe dehydration. IV fluids)	162
2015-04-28	C (severe dehydration. IV fluids)	ND
2015-04-29	ND	531
2015-04-29	ND	490
2015-04-29	ND	68
2015-04-29	ND	577
2015-04-29	ND	1402
2015-04-29	ND	584
2015-04-29	A (no dehydration. Send home with ORS)	143
2015-04-29	B (some dehydration. ORS and observe at hospital)	1402
2015-04-30	ND	1280
2015-04-30	ND	577
2015-04-30	ND	ND
2015-04-30	ND	495
2015-04-30	B (some dehydration. ORS and observe at hospital)	143
2015-04-30	B (some dehydration. ORS and observe at hospital)	1083
2015-04-30	B (some dehydration. ORS and observe at hospital)	187
2015-04-30	B (some dehydration. ORS and observe at hospital)	225
2015-04-30	B (some dehydration. ORS and observe at hospital)	225
2015-05-01	ND	569
2015-05-01	ND	975
2015-05-01	ND	490
2015-05-01	B (some dehydration. ORS and observe at hospital)	712
2015-05-01	B (some dehydration. ORS and observe at hospital)	ND
2015-05-01	B (some dehydration. ORS and observe at hospital)	321
2015-05-01	B (some dehydration. ORS and observe at hospital)	234
2015-05-01	B (some dehydration. ORS and observe at hospital)	229
2015-05-02	ND	490
2015-05-02	ND	549
2015-05-02	ND	515
2015-05-02	B (some dehydration. ORS and observe at hospital)	1402
2015-05-02	B (some dehydration. ORS and observe at hospital)	321
2015-05-03	A (no dehydration. Send home with ORS)	688
2015-05-03	B (some dehydration. ORS and observe at hospital)	225
2015-05-03	B (some dehydration. ORS and observe at hospital)	313
2015-05-03	B (some dehydration. ORS and observe at hospital)	448
2015-05-03	B (some dehydration. ORS and observe at hospital)	ND
2015-05-03	B (some dehydration. ORS and observe at hospital)	253
2015-05-04	ND	1393
2015-05-04	ND	500
2015-05-04	A (no dehydration. Send home with ORS)	692
2015-05-05	ND	531
2015-05-05	ND	ND
2015-05-05	ND	1031
2015-05-05	ND	543
2015-05-05	ND	524
2015-05-05	B (some dehydration. ORS and observe at hospital)	287
2015-05-06	ND	554
2015-05-06	ND	610
2015-05-06	ND	531
2015-05-07	ND	573
2015-05-07	ND	ND
2015-05-07	ND	490
2015-05-07	ND	531
2015-05-08	ND	500
2015-05-08	ND	1364
2015-05-08	B (some dehydration. ORS and observe at hospital)	1057
2015-05-09	ND	515
2015-05-09	ND	495
2015-05-09	ND	515
2015-05-09	ND	1296
2015-05-09	ND	517
2015-05-10	ND	517
2015-05-11	ND	740
2015-05-11	ND	767
2015-05-11	B (some dehydration. ORS and observe at hospital)	90
2015-05-11	B (some dehydration. ORS and observe at hospital)	288
2015-05-11	B (some dehydration. ORS and observe at hospital)	288
2015-05-12	ND	370
2015-05-12	ND	549
2015-05-12	ND	767
2015-05-12	ND	390
2015-05-13	ND	489
2015-05-13	ND	ND
2015-05-13	ND	740
2015-05-13	ND	596
2015-05-13	ND	512
2015-05-13	ND	405
2015-05-13	ND	591
2015-05-13	ND	513
2015-05-13	ND	550
2015-05-13	B (some dehydration. ORS and observe at hospital)	ND
2015-05-15	ND	740
2015-05-15	ND	ND
2015-05-15	ND	740
2015-05-15	B (some dehydration. ORS and observe at hospital)	271
2015-05-15	B (some dehydration. ORS and observe at hospital)	204
2015-05-15	C (severe dehydration. IV fluids)	50
2015-05-16	ND	621
2015-05-16	ND	141
2015-05-16	ND	753
2015-05-16	ND	151
2015-05-17	ND	621
2015-05-17	ND	1365
2015-05-17	ND	764
2015-05-17	ND	621
2015-05-17	A (no dehydration. Send home with ORS)	225
2015-05-17	B (some dehydration. ORS and observe at hospital)	234
2015-05-17	B (some dehydration. ORS and observe at hospital)	224
2015-05-17	B (some dehydration. ORS and observe at hospital)	234
2015-05-17	B (some dehydration. ORS and observe at hospital)	234
2015-05-17	B (some dehydration. ORS and observe at hospital)	999
2015-05-17	B (some dehydration. ORS and observe at hospital)	997
2015-05-18	ND	377
2015-05-18	ND	569
2015-05-18	ND	599
2015-05-18	ND	621
2015-05-18	B (some dehydration. ORS and observe at hospital)	ND
2015-05-19	ND	767
2015-05-19	ND	767
2015-05-19	B (some dehydration. ORS and observe at hospital)	234
2015-05-20	B (some dehydration. ORS and observe at hospital)	221
2015-05-20	B (some dehydration. ORS and observe at hospital)	1387
2015-05-21	ND	751
2015-05-21	ND	554
2015-05-21	B (some dehydration. ORS and observe at hospital)	ND
2015-05-24	ND	323
2015-05-24	ND	187
2015-05-24	ND	199
2015-05-24	ND	149
2015-05-24	B (some dehydration. ORS and observe at hospital)	220
2015-05-24	B (some dehydration. ORS and observe at hospital)	217
2015-05-25	ND	1290
2015-05-25	ND	763
2015-05-25	ND	323
2015-05-25	ND	495
2015-05-25	ND	1499
2015-05-25	ND	1523
2015-05-25	ND	1499
2015-05-25	B (some dehydration. ORS and observe at hospital)	ND
2015-05-25	B (some dehydration. ORS and observe at hospital)	296
2015-05-25	B (some dehydration. ORS and observe at hospital)	1015
2015-05-26	ND	680
2015-05-27	ND	482
2015-05-27	ND	584
2015-05-27	B (some dehydration. ORS and observe at hospital)	1026
2015-05-27	B (some dehydration. ORS and observe at hospital)	254
2015-05-27	B (some dehydration. ORS and observe at hospital)	229
2015-05-29	B (some dehydration. ORS and observe at hospital)	300
2015-05-29	B (some dehydration. ORS and observe at hospital)	323
2015-05-29	B (some dehydration. ORS and observe at hospital)	195
2015-05-30	ND	767
2015-05-31	ND	ND
2015-05-31	ND	490
2015-05-31	ND	386
2015-05-31	ND	386
2015-05-31	ND	386
2015-05-31	ND	161
2015-05-31	ND	386
2015-06-01	ND	751
2015-06-01	ND	ND
2015-06-01	ND	1053
2015-06-01	B (some dehydration. ORS and observe at hospital)	220
2015-06-02	ND	386
2015-06-02	ND	761
2015-06-02	ND	767
2015-06-02	ND	767
2015-06-02	ND	751
2015-06-02	ND	665
2015-06-02	C (severe dehydration. IV fluids)	207
2015-06-03	B (some dehydration. ORS and observe at hospital)	233
2015-06-03	B (some dehydration. ORS and observe at hospital)	680
2015-06-04	ND	275
2015-06-04	ND	233
2015-06-04	B (some dehydration. ORS and observe at hospital)	323
2015-06-04	B (some dehydration. ORS and observe at hospital)	275
2015-06-04	B (some dehydration. ORS and observe at hospital)	233
2015-06-05	ND	234
2015-06-05	ND	1499
2015-06-05	ND	1517
2015-06-05	ND	767
2015-06-05	B (some dehydration. ORS and observe at hospital)	233
2015-06-05	B (some dehydration. ORS and observe at hospital)	234
2015-06-05	B (some dehydration. ORS and observe at hospital)	1070
2015-06-06	ND	1102
2015-06-06	ND	562
2015-06-06	ND	1503
2015-06-06	ND	380
2015-06-06	ND	205
2015-06-06	ND	514
2015-06-06	ND	601
2015-06-06	ND	333
2015-06-06	ND	31
2015-06-06	ND	ND
2015-06-06	ND	31
2015-06-06	A (no dehydration. Send home with ORS)	686
2015-06-06	B (some dehydration. ORS and observe at hospital)	205
2015-06-07	ND	1036
2015-06-07	ND	558
2015-06-07	ND	482
2015-06-07	ND	233
2015-06-07	ND	ND
2015-06-07	ND	220
2015-06-07	B (some dehydration. ORS and observe at hospital)	1036
2015-06-07	B (some dehydration. ORS and observe at hospital)	233
2015-06-07	B (some dehydration. ORS and observe at hospital)	275
2015-06-08	ND	635
2015-06-08	ND	495
2015-06-08	ND	323
2015-06-08	ND	738
2015-06-08	B (some dehydration. ORS and observe at hospital)	275
2015-06-08	C (severe dehydration. IV fluids)	386
2015-06-08	C (severe dehydration. IV fluids)	110
2015-06-09	ND	767
2015-06-09	ND	1029
2015-06-09	ND	882
2015-06-09	ND	882
2015-06-09	ND	882
2015-06-09	B (some dehydration. ORS and observe at hospital)	1032
2015-06-09	B (some dehydration. ORS and observe at hospital)	ND
2015-06-09	B (some dehydration. ORS and observe at hospital)	1029
2015-06-09	B (some dehydration. ORS and observe at hospital)	882
2015-06-09	B (some dehydration. ORS and observe at hospital)	882
2015-06-09	B (some dehydration. ORS and observe at hospital)	882
2015-06-09	C (severe dehydration. IV fluids)	75
2015-06-10	ND	700
2015-06-10	ND	310
2015-06-10	ND	35
2015-06-10	ND	310
2015-06-10	ND	392
2015-06-10	ND	744
2015-06-10	ND	554
2015-06-10	ND	1009
2015-06-10	B (some dehydration. ORS and observe at hospital)	1050
2015-06-11	ND	1029
2015-06-11	ND	577
2015-06-11	ND	490
2015-06-11	ND	11
2015-06-11	B (some dehydration. ORS and observe at hospital)	682
2015-06-11	B (some dehydration. ORS and observe at hospital)	1029
2015-06-11	B (some dehydration. ORS and observe at hospital)	275
2015-06-12	ND	328
2015-06-12	ND	364
2015-06-12	ND	275
2015-06-12	ND	1542
2015-06-12	ND	1542
2015-06-12	ND	234
2015-06-12	B (some dehydration. ORS and observe at hospital)	275
2015-06-12	B (some dehydration. ORS and observe at hospital)	275
2015-06-12	B (some dehydration. ORS and observe at hospital)	11
2015-06-13	ND	213
2015-06-13	ND	233
2015-06-13	ND	233
2015-06-13	B (some dehydration. ORS and observe at hospital)	233
2015-06-13	B (some dehydration. ORS and observe at hospital)	233
2015-06-13	B (some dehydration. ORS and observe at hospital)	246
2015-06-13	C (severe dehydration. IV fluids)	177
2015-06-14	ND	233
2015-06-14	ND	321
2015-06-14	ND	728
2015-06-14	ND	400
2015-06-14	ND	601
2015-06-14	ND	763
2015-06-14	ND	400
2015-06-14	B (some dehydration. ORS and observe at hospital)	233
2015-06-14	B (some dehydration. ORS and observe at hospital)	321
2015-06-15	ND	635
2015-06-15	ND	ND
2015-06-15	ND	1515
2015-06-15	ND	767
2015-06-15	ND	1155
2015-06-15	ND	756
2015-06-15	ND	1512
2015-06-16	ND	754
2015-06-16	ND	767
2015-06-16	ND	323
2015-06-16	ND	310
2015-06-16	ND	310
2015-06-16	ND	760
2015-06-16	ND	1064
2015-06-17	ND	365
2015-06-17	ND	328
2015-06-18	ND	503
2015-06-18	B (some dehydration. ORS and observe at hospital)	190
2015-06-18	B (some dehydration. ORS and observe at hospital)	190
2015-06-19	ND	751
2015-06-19	ND	656
2015-06-19	ND	658
2015-06-19	B (some dehydration. ORS and observe at hospital)	190
2015-06-20	ND	558
2015-06-21	ND	373
2015-06-21	ND	407
2015-06-21	ND	31
2015-06-21	ND	328
2015-06-21	ND	1113
2015-06-21	ND	1113
2015-06-21	ND	1113
2015-06-22	ND	1113
2015-06-22	ND	659
2015-06-22	ND	1113
2015-06-22	ND	1113
2015-06-22	ND	ND
2015-06-22	ND	ND
2015-06-22	ND	1113
2015-06-22	ND	1113
2015-06-22	ND	554
2015-06-22	ND	1113
2015-06-22	ND	554
2015-06-22	B (some dehydration. ORS and observe at hospital)	225
2015-06-23	ND	1156
2015-06-23	ND	1113
2015-06-23	ND	364
2015-06-23	ND	1402
2015-06-23	ND	1100
2015-06-23	A (no dehydration. Send home with ORS)	973
2015-06-23	B (some dehydration. ORS and observe at hospital)	11
2015-06-23	C (severe dehydration. IV fluids)	20
2015-06-24	ND	240
2015-06-24	ND	1113
2015-06-24	ND	1040
2015-06-24	ND	723
2015-06-24	B (some dehydration. ORS and observe at hospital)	207
2015-06-24	B (some dehydration. ORS and observe at hospital)	225
2015-06-24	B (some dehydration. ORS and observe at hospital)	1040
2015-06-24	C (severe dehydration. IV fluids)	240
2015-06-25	ND	490
2015-06-25	ND	723
2015-06-25	ND	767
2015-06-25	ND	577
2015-06-25	ND	659
2015-06-25	ND	ND
2015-06-25	ND	635
2015-06-25	A (no dehydration. Send home with ORS)	694
2015-06-26	ND	352
2015-06-26	ND	554
2015-06-26	ND	503
2015-06-26	ND	1050
2015-06-26	ND	1134
2015-06-26	ND	554
2015-06-26	B (some dehydration. ORS and observe at hospital)	1050
2015-06-26	B (some dehydration. ORS and observe at hospital)	287
2015-06-26	B (some dehydration. ORS and observe at hospital)	1040
2015-06-27	ND	190
2015-06-27	ND	ND
2015-06-27	ND	503
2015-06-27	ND	503
2015-06-27	ND	1113
2015-06-27	B (some dehydration. ORS and observe at hospital)	289
2015-06-27	B (some dehydration. ORS and observe at hospital)	190
2015-06-27	B (some dehydration. ORS and observe at hospital)	ND
2015-06-28	ND	554
2015-06-28	ND	ND
2015-06-28	ND	543
2015-06-28	ND	1156
2015-06-28	ND	49
2015-06-28	ND	957
2015-06-28	ND	582
2015-06-28	ND	363
2015-06-28	B (some dehydration. ORS and observe at hospital)	1000
2015-06-28	B (some dehydration. ORS and observe at hospital)	49
2015-06-29	ND	756
2015-06-29	ND	199
2015-06-29	ND	190
2015-06-29	ND	649
2015-06-29	ND	654
2015-06-29	A (no dehydration. Send home with ORS)	692
2015-06-29	B (some dehydration. ORS and observe at hospital)	ND
2015-06-29	B (some dehydration. ORS and observe at hospital)	220
2015-06-29	B (some dehydration. ORS and observe at hospital)	305
2015-06-29	B (some dehydration. ORS and observe at hospital)	31
2015-06-29	B (some dehydration. ORS and observe at hospital)	275
2015-06-29	C (severe dehydration. IV fluids)	190
2015-06-30	ND	649
2015-06-30	ND	1116
2015-06-30	ND	1116
2015-06-30	ND	1116
2015-06-30	A (no dehydration. Send home with ORS)	703
2015-07-01	ND	323
2015-07-01	B (some dehydration. ORS and observe at hospital)	206
2015-07-01	B (some dehydration. ORS and observe at hospital)	ND
2015-07-02	ND	ND
2015-07-02	ND	744
2015-07-02	ND	728
2015-07-02	A (no dehydration. Send home with ORS)	531
2015-07-02	B (some dehydration. ORS and observe at hospital)	254
2015-07-02	B (some dehydration. ORS and observe at hospital)	31
2015-07-02	B (some dehydration. ORS and observe at hospital)	1056
2015-07-02	B (some dehydration. ORS and observe at hospital)	543
2015-07-02	B (some dehydration. ORS and observe at hospital)	503
2015-07-02	B (some dehydration. ORS and observe at hospital)	728
2015-07-02	C (severe dehydration. IV fluids)	659
2015-07-02	C (severe dehydration. IV fluids)	711
2015-07-02	C (severe dehydration. IV fluids)	379
2015-07-03	ND	238
2015-07-03	ND	172
2015-07-03	ND	813
2015-07-03	A (no dehydration. Send home with ORS)	549
2015-07-03	B (some dehydration. ORS and observe at hospital)	255
2015-07-03	B (some dehydration. ORS and observe at hospital)	813
2015-07-03	C (severe dehydration. IV fluids)	503
2015-07-04	ND	ND
2015-07-04	ND	ND
2015-07-04	ND	1116
2015-07-04	ND	1521
2015-07-04	B (some dehydration. ORS and observe at hospital)	265
2015-07-04	C (severe dehydration. IV fluids)	598
2015-07-04	C (severe dehydration. IV fluids)	649
2015-07-04	C (severe dehydration. IV fluids)	389
2015-07-05	ND	310
2015-07-05	ND	1005
2015-07-05	ND	756
2015-07-05	ND	756
2015-07-05	B (some dehydration. ORS and observe at hospital)	233
2015-07-05	B (some dehydration. ORS and observe at hospital)	217
2015-07-05	B (some dehydration. ORS and observe at hospital)	227
2015-07-05	B (some dehydration. ORS and observe at hospital)	323
2015-07-05	B (some dehydration. ORS and observe at hospital)	220
2015-07-05	B (some dehydration. ORS and observe at hospital)	224
2015-07-05	B (some dehydration. ORS and observe at hospital)	225
2015-07-05	C (severe dehydration. IV fluids)	477
2015-07-05	C (severe dehydration. IV fluids)	653
2015-07-05	C (severe dehydration. IV fluids)	591
2015-07-05	C (severe dehydration. IV fluids)	659
2015-07-06	ND	11
2015-07-06	ND	767
2015-07-06	ND	729
2015-07-06	ND	234
2015-07-06	ND	141
2015-07-06	ND	705
2015-07-06	ND	729
2015-07-06	B (some dehydration. ORS and observe at hospital)	234
2015-07-06	B (some dehydration. ORS and observe at hospital)	698
2015-07-06	B (some dehydration. ORS and observe at hospital)	233
2015-07-06	C (severe dehydration. IV fluids)	386
2015-07-06	C (severe dehydration. IV fluids)	336
2015-07-06	C (severe dehydration. IV fluids)	477
2015-07-06	C (severe dehydration. IV fluids)	500
2015-07-06	C (severe dehydration. IV fluids)	386
2015-07-06	C (severe dehydration. IV fluids)	659
2015-07-07	ND	729
2015-07-07	ND	729
2015-07-07	ND	729
2015-07-07	ND	364
2015-07-07	ND	766
2015-07-07	ND	1522
2015-07-07	ND	ND
2015-07-07	ND	ND
2015-07-07	ND	729
2015-07-07	ND	722
2015-07-07	ND	729
2015-07-07	ND	729
2015-07-07	ND	234
2015-07-07	ND	729
2015-07-07	ND	756
2015-07-07	ND	729
2015-07-07	A (no dehydration. Send home with ORS)	386
2015-07-07	A (no dehydration. Send home with ORS)	524
2015-07-07	B (some dehydration. ORS and observe at hospital)	1040
2015-07-07	B (some dehydration. ORS and observe at hospital)	ND
2015-07-07	B (some dehydration. ORS and observe at hospital)	195
2015-07-07	B (some dehydration. ORS and observe at hospital)	1005
2015-07-07	C (severe dehydration. IV fluids)	568
2015-07-07	C (severe dehydration. IV fluids)	596
2015-07-07	C (severe dehydration. IV fluids)	501
2015-07-07	C (severe dehydration. IV fluids)	568
2015-07-07	C (severe dehydration. IV fluids)	584
2015-07-07	C (severe dehydration. IV fluids)	501
2015-07-07	C (severe dehydration. IV fluids)	568
2015-07-07	C (severe dehydration. IV fluids)	568
2015-07-08	ND	729
2015-07-08	ND	729
2015-07-08	ND	1522
2015-07-08	ND	729
2015-07-08	ND	729
2015-07-08	ND	981
2015-07-08	ND	158
2015-07-08	ND	1116
2015-07-08	ND	1514
2015-07-08	B (some dehydration. ORS and observe at hospital)	275
2015-07-08	C (severe dehydration. IV fluids)	501
2015-07-08	C (severe dehydration. IV fluids)	495
2015-07-08	C (severe dehydration. IV fluids)	501
2015-07-08	C (severe dehydration. IV fluids)	490
2015-07-08	C (severe dehydration. IV fluids)	556
2015-07-08	C (severe dehydration. IV fluids)	679
2015-07-09	ND	767
2015-07-09	ND	761
2015-07-09	ND	729
2015-07-09	ND	737
2015-07-09	ND	323
2015-07-09	ND	172
2015-07-09	ND	729
2015-07-09	ND	766
2015-07-09	A (no dehydration. Send home with ORS)	1254
2015-07-09	A (no dehydration. Send home with ORS)	527
2015-07-09	A (no dehydration. Send home with ORS)	501
2015-07-09	A (no dehydration. Send home with ORS)	514
2015-07-09	B (some dehydration. ORS and observe at hospital)	1050
2015-07-09	B (some dehydration. ORS and observe at hospital)	234
2015-07-09	B (some dehydration. ORS and observe at hospital)	271
2015-07-09	B (some dehydration. ORS and observe at hospital)	535
2015-07-09	C (severe dehydration. IV fluids)	501
2015-07-09	C (severe dehydration. IV fluids)	566
2015-07-09	C (severe dehydration. IV fluids)	495
2015-07-10	A (no dehydration. Send home with ORS)	495
2015-07-10	A (no dehydration. Send home with ORS)	636
2015-07-10	A (no dehydration. Send home with ORS)	1280
2015-07-10	A (no dehydration. Send home with ORS)	639
2015-07-10	A (no dehydration. Send home with ORS)	597
2015-07-10	B (some dehydration. ORS and observe at hospital)	ND
2015-07-10	B (some dehydration. ORS and observe at hospital)	670
2015-07-10	B (some dehydration. ORS and observe at hospital)	512
2015-07-10	B (some dehydration. ORS and observe at hospital)	365
2015-07-10	C (severe dehydration. IV fluids)	31
2015-07-10	C (severe dehydration. IV fluids)	597
2015-07-10	C (severe dehydration. IV fluids)	670
2015-07-11	ND	886
2015-07-11	ND	39
2015-07-11	ND	886
2015-07-11	ND	495
2015-07-11	B (some dehydration. ORS and observe at hospital)	670
2015-07-11	B (some dehydration. ORS and observe at hospital)	ND
2015-07-11	B (some dehydration. ORS and observe at hospital)	319
2015-07-11	B (some dehydration. ORS and observe at hospital)	657
2015-07-11	B (some dehydration. ORS and observe at hospital)	ND
2015-07-11	B (some dehydration. ORS and observe at hospital)	670
2015-07-11	B (some dehydration. ORS and observe at hospital)	535
2015-07-11	C (severe dehydration. IV fluids)	668
2015-07-11	C (severe dehydration. IV fluids)	218
2015-07-11	C (severe dehydration. IV fluids)	386
2015-07-11	C (severe dehydration. IV fluids)	657
2015-07-12	ND	1369
2015-07-12	ND	549
2015-07-12	ND	543
2015-07-12	A (no dehydration. Send home with ORS)	657
2015-07-12	B (some dehydration. ORS and observe at hospital)	ND
2015-07-12	C (severe dehydration. IV fluids)	356
2015-07-12	C (severe dehydration. IV fluids)	670
2015-07-12	C (severe dehydration. IV fluids)	501
2015-07-12	C (severe dehydration. IV fluids)	501
2015-07-13	ND	886
2015-07-13	ND	482
2015-07-13	ND	886
2015-07-13	ND	611
2015-07-13	A (no dehydration. Send home with ORS)	674
2015-07-13	B (some dehydration. ORS and observe at hospital)	501
2015-07-13	B (some dehydration. ORS and observe at hospital)	323
2015-07-13	B (some dehydration. ORS and observe at hospital)	670
2015-07-13	C (severe dehydration. IV fluids)	670
2015-07-13	C (severe dehydration. IV fluids)	501
2015-07-13	C (severe dehydration. IV fluids)	656
2015-07-13	C (severe dehydration. IV fluids)	405
2015-07-13	C (severe dehydration. IV fluids)	356
2015-07-13	C (severe dehydration. IV fluids)	670
2015-07-13	C (severe dehydration. IV fluids)	357
2015-07-13	C (severe dehydration. IV fluids)	670
2015-07-13	C (severe dehydration. IV fluids)	386
2015-07-14	ND	622
2015-07-14	ND	510
2015-07-14	ND	729
2015-07-14	ND	549
2015-07-14	ND	729
2015-07-14	ND	33
2015-07-14	ND	1310
2015-07-14	ND	722
2015-07-14	ND	729
2015-07-14	ND	1522
2015-07-14	A (no dehydration. Send home with ORS)	356
2015-07-14	B (some dehydration. ORS and observe at hospital)	386
2015-07-14	B (some dehydration. ORS and observe at hospital)	670
2015-07-14	B (some dehydration. ORS and observe at hospital)	356
2015-07-14	B (some dehydration. ORS and observe at hospital)	33
2015-07-14	B (some dehydration. ORS and observe at hospital)	271
2015-07-14	C (severe dehydration. IV fluids)	707
2015-07-14	C (severe dehydration. IV fluids)	567
2015-07-14	C (severe dehydration. IV fluids)	670
2015-07-14	C (severe dehydration. IV fluids)	501
2015-07-14	C (severe dehydration. IV fluids)	567
2015-07-15	ND	1500
2015-07-15	ND	566
2015-07-15	ND	989
2015-07-15	ND	738
2015-07-15	ND	729
2015-07-15	ND	549
2015-07-15	ND	554
2015-07-15	ND	140
2015-07-15	ND	729
2015-07-15	ND	543
2015-07-15	ND	722
2015-07-15	A (no dehydration. Send home with ORS)	501
2015-07-15	A (no dehydration. Send home with ORS)	386
2015-07-15	B (some dehydration. ORS and observe at hospital)	407
2015-07-15	B (some dehydration. ORS and observe at hospital)	1366
2015-07-15	B (some dehydration. ORS and observe at hospital)	329
2015-07-15	B (some dehydration. ORS and observe at hospital)	323
2015-07-15	B (some dehydration. ORS and observe at hospital)	670
2015-07-15	C (severe dehydration. IV fluids)	ND
2015-07-15	C (severe dehydration. IV fluids)	3
2015-07-15	C (severe dehydration. IV fluids)	703
2015-07-16	ND	498
2015-07-16	ND	531
2015-07-16	B (some dehydration. ORS and observe at hospital)	323
2015-07-16	B (some dehydration. ORS and observe at hospital)	221
2015-07-16	B (some dehydration. ORS and observe at hospital)	316
2015-07-16	B (some dehydration. ORS and observe at hospital)	1200
2015-07-16	B (some dehydration. ORS and observe at hospital)	792
2015-07-16	B (some dehydration. ORS and observe at hospital)	225
2015-07-16	B (some dehydration. ORS and observe at hospital)	211
2015-07-16	B (some dehydration. ORS and observe at hospital)	225
2015-07-16	B (some dehydration. ORS and observe at hospital)	319
2015-07-16	C (severe dehydration. IV fluids)	703
2015-07-16	C (severe dehydration. IV fluids)	329
2015-07-17	ND	986
2015-07-17	ND	ND
2015-07-17	ND	512
2015-07-17	ND	495
2015-07-17	ND	733
2015-07-17	ND	531
2015-07-17	ND	583
2015-07-17	ND	769
2015-07-17	ND	495
2015-07-17	ND	1283
2015-07-17	ND	512
2015-07-17	ND	733
2015-07-17	A (no dehydration. Send home with ORS)	357
2015-07-17	B (some dehydration. ORS and observe at hospital)	1065
2015-07-17	C (severe dehydration. IV fluids)	357
2015-07-18	ND	167
2015-07-18	ND	1168
2015-07-18	ND	756
2015-07-18	ND	140
2015-07-18	ND	680
2015-07-18	ND	504
2015-07-18	ND	495
2015-07-18	ND	108
2015-07-18	A (no dehydration. Send home with ORS)	407
2015-07-18	B (some dehydration. ORS and observe at hospital)	714
2015-07-18	B (some dehydration. ORS and observe at hospital)	218
2015-07-18	C (severe dehydration. IV fluids)	562
2015-07-18	C (severe dehydration. IV fluids)	706
2015-07-19	ND	33
2015-07-19	ND	737
2015-07-19	ND	503
2015-07-19	ND	890
2015-07-19	A (no dehydration. Send home with ORS)	567
2015-07-19	B (some dehydration. ORS and observe at hospital)	299
2015-07-19	B (some dehydration. ORS and observe at hospital)	203
2015-07-19	B (some dehydration. ORS and observe at hospital)	1200
2015-07-19	C (severe dehydration. IV fluids)	501
2015-07-19	C (severe dehydration. IV fluids)	649
2015-07-19	C (severe dehydration. IV fluids)	33
2015-07-20	ND	723
2015-07-20	ND	151
2015-07-20	ND	599
2015-07-20	A (no dehydration. Send home with ORS)	400
2015-07-20	A (no dehydration. Send home with ORS)	535
2015-07-20	A (no dehydration. Send home with ORS)	498
2015-07-20	B (some dehydration. ORS and observe at hospital)	1065
2015-07-20	B (some dehydration. ORS and observe at hospital)	221
2015-07-20	B (some dehydration. ORS and observe at hospital)	287
2015-07-20	B (some dehydration. ORS and observe at hospital)	757
2015-07-20	B (some dehydration. ORS and observe at hospital)	207
2015-07-20	C (severe dehydration. IV fluids)	701
2015-07-20	C (severe dehydration. IV fluids)	349
2015-07-20	C (severe dehydration. IV fluids)	501
2015-07-21	ND	532
2015-07-21	ND	477
2015-07-21	ND	404
2015-07-21	ND	387
2015-07-21	ND	183
2015-07-21	ND	33
2015-07-21	ND	102
2015-07-21	ND	767
2015-07-21	B (some dehydration. ORS and observe at hospital)	359
2015-07-21	B (some dehydration. ORS and observe at hospital)	303
2015-07-21	B (some dehydration. ORS and observe at hospital)	33
2015-07-21	B (some dehydration. ORS and observe at hospital)	31
2015-07-21	B (some dehydration. ORS and observe at hospital)	649
2015-07-21	C (severe dehydration. IV fluids)	344
2015-07-21	C (severe dehydration. IV fluids)	503
2015-07-22	ND	640
2015-07-22	ND	387
2015-07-22	ND	737
2015-07-22	ND	482
2015-07-22	ND	704
2015-07-22	ND	ND
2015-07-22	ND	716
2015-07-22	ND	599
2015-07-22	ND	532
2015-07-22	ND	737
2015-07-22	B (some dehydration. ORS and observe at hospital)	241
2015-07-22	B (some dehydration. ORS and observe at hospital)	357
2015-07-22	B (some dehydration. ORS and observe at hospital)	287
2015-07-22	C (severe dehydration. IV fluids)	ND
2015-07-22	C (severe dehydration. IV fluids)	3
2015-07-22	C (severe dehydration. IV fluids)	535
2015-07-22	C (severe dehydration. IV fluids)	501
2015-07-23	ND	488
2015-07-23	ND	ND
2015-07-23	ND	729
2015-07-23	ND	729
2015-07-23	ND	762
2015-07-23	B (some dehydration. ORS and observe at hospital)	392
2015-07-23	B (some dehydration. ORS and observe at hospital)	321
2015-07-23	C (severe dehydration. IV fluids)	282
2015-07-23	C (severe dehydration. IV fluids)	336
2015-07-23	C (severe dehydration. IV fluids)	347
2015-07-23	C (severe dehydration. IV fluids)	363
2015-07-23	C (severe dehydration. IV fluids)	535
2015-07-23	C (severe dehydration. IV fluids)	398
2015-07-24	ND	762
2015-07-24	ND	729
2015-07-24	ND	482
2015-07-24	ND	52
2015-07-24	ND	90
2015-07-24	ND	987
2015-07-24	ND	890
2015-07-24	B (some dehydration. ORS and observe at hospital)	1145
2015-07-24	C (severe dehydration. IV fluids)	501
2015-07-25	ND	621
2015-07-25	ND	532
2015-07-25	ND	729
2015-07-25	ND	387
2015-07-25	ND	594
2015-07-25	ND	513
2015-07-25	ND	767
2015-07-25	A (no dehydration. Send home with ORS)	408
2015-07-25	A (no dehydration. Send home with ORS)	535
2015-07-25	B (some dehydration. ORS and observe at hospital)	301
2015-07-25	B (some dehydration. ORS and observe at hospital)	301
2015-07-25	B (some dehydration. ORS and observe at hospital)	272
2015-07-25	B (some dehydration. ORS and observe at hospital)	1022
2015-07-25	B (some dehydration. ORS and observe at hospital)	321
2015-07-25	C (severe dehydration. IV fluids)	392
2015-07-26	ND	364
2015-07-26	ND	330
2015-07-26	ND	1520
2015-07-26	ND	767
2015-07-26	ND	591
2015-07-26	ND	364
2015-07-26	A (no dehydration. Send home with ORS)	31
2015-07-26	B (some dehydration. ORS and observe at hospital)	405
2015-07-26	B (some dehydration. ORS and observe at hospital)	445
2015-07-26	C (severe dehydration. IV fluids)	386
2015-07-26	C (severe dehydration. IV fluids)	708
2015-07-26	C (severe dehydration. IV fluids)	392
2015-07-26	C (severe dehydration. IV fluids)	390
2015-07-26	C (severe dehydration. IV fluids)	8
2015-07-26	C (severe dehydration. IV fluids)	342
2015-07-27	ND	695
2015-07-27	ND	500
2015-07-27	ND	36
2015-07-27	ND	531
2015-07-27	ND	621
2015-07-27	ND	532
2015-07-27	ND	607
2015-07-27	B (some dehydration. ORS and observe at hospital)	851
2015-07-28	ND	546
2015-07-28	ND	106
2015-07-28	ND	585
2015-07-28	ND	151
2015-07-28	ND	1255
2015-07-28	ND	514
2015-07-28	ND	563
2015-07-28	ND	585
2015-07-28	ND	387
2015-07-28	B (some dehydration. ORS and observe at hospital)	272
2015-07-28	B (some dehydration. ORS and observe at hospital)	703
2015-07-28	B (some dehydration. ORS and observe at hospital)	241
2015-07-29	ND	525
2015-07-29	ND	414
2015-07-29	ND	364
2015-07-29	ND	463
2015-07-29	ND	1210
2015-07-29	ND	1255
2015-07-29	ND	364
2015-07-29	ND	1255
2015-07-29	ND	31
2015-07-29	ND	414
2015-07-29	ND	591
2015-07-29	ND	729
2015-07-29	ND	767
2015-07-29	ND	463
2015-07-29	ND	607
2015-07-29	ND	532
2015-07-29	B (some dehydration. ORS and observe at hospital)	1185
2015-07-29	B (some dehydration. ORS and observe at hospital)	ND
2015-07-29	C (severe dehydration. IV fluids)	685
2015-07-30	ND	363
2015-07-30	ND	395
2015-07-30	ND	303
2015-07-30	ND	370
2015-07-30	ND	591
2015-07-30	ND	1255
2015-07-30	ND	728
2015-07-30	ND	1300
2015-07-30	ND	153
2015-07-30	B (some dehydration. ORS and observe at hospital)	1495
2015-07-31	ND	33
2015-07-31	ND	1492
2015-07-31	ND	744
2015-07-31	ND	454
2015-07-31	ND	532
2015-07-31	ND	1255
2015-07-31	ND	43
2015-07-31	ND	1255
2015-07-31	ND	207
2015-07-31	ND	155
2015-07-31	ND	7
2015-07-31	ND	7
2015-07-31	ND	649
2015-07-31	ND	1255
2015-08-01	ND	498
2015-08-01	ND	1181
2015-08-01	ND	31
2015-08-01	ND	744
2015-08-01	ND	1103
2015-08-01	ND	1448
2015-08-01	ND	407
2015-08-01	ND	328
2015-08-02	ND	820
2015-08-02	ND	432
2015-08-02	ND	151
2015-08-02	ND	744
2015-08-02	ND	744
2015-08-02	ND	304
2015-08-03	ND	1103
2015-08-03	ND	737
2015-08-03	ND	606
2015-08-03	ND	692
2015-08-03	ND	767
2015-08-03	ND	1483
2015-08-03	ND	1448
2015-08-03	ND	304
2015-08-04	ND	376
2015-08-04	ND	31
2015-08-04	ND	1483
2015-08-04	ND	262
2015-08-04	ND	993
2015-08-04	ND	31
2015-08-04	ND	376
2015-08-04	ND	703
2015-08-05	ND	376
2015-08-05	ND	1448
2015-08-05	ND	224
2015-08-05	ND	1448
2015-08-05	ND	370
2015-08-05	ND	1484
2015-08-05	ND	744
2015-08-05	ND	744
2015-08-05	ND	390
2015-08-05	ND	341
2015-08-06	ND	744
2015-08-06	ND	1136
2015-08-06	ND	1453
2015-08-06	ND	722
2015-08-06	ND	1448
2015-08-07	ND	1492
2015-08-07	ND	1483
2015-08-07	ND	606
2015-08-08	ND	287
2015-08-08	ND	31
2015-08-08	ND	682
2015-08-08	ND	365
2015-08-08	ND	535
2015-08-08	ND	1542
2015-08-08	ND	679
2015-08-08	ND	328
2015-08-08	ND	298
2015-08-08	ND	31
2015-08-08	ND	365
2015-08-09	ND	1198
2015-08-09	ND	467
2015-08-09	ND	679
2015-08-09	ND	241
2015-08-09	ND	1539
2015-08-09	ND	503
2015-08-09	ND	324
2015-08-10	ND	1483
2015-08-10	ND	1443
2015-08-10	ND	1448
2015-08-10	ND	1448
2015-08-10	ND	1008
2015-08-10	ND	1481
2015-08-10	ND	1483
2015-08-10	ND	1492
2015-08-10	ND	678
2015-08-11	ND	711
2015-08-11	ND	1467
2015-08-11	ND	390
2015-08-11	ND	412
2015-08-11	ND	498
2015-08-11	ND	703
2015-08-11	ND	365
2015-08-11	ND	655
2015-08-11	ND	329
2015-08-11	ND	467
2015-08-11	ND	ND
2015-08-11	ND	591
2015-08-11	ND	498
2015-08-11	ND	682
2015-08-11	ND	1483
2015-08-12	ND	49
2015-08-12	ND	232
2015-08-12	ND	957
2015-08-12	ND	682
2015-08-12	ND	1483
2015-08-12	ND	1481
2015-08-12	ND	376
2015-08-13	ND	498
2015-08-13	ND	711
2015-08-13	ND	684
2015-08-13	ND	31
2015-08-13	ND	982
2015-08-13	ND	679
2015-08-13	ND	1002
2015-08-13	ND	703
2015-08-14	ND	331
2015-08-14	ND	328
2015-08-14	ND	1143
2015-08-14	ND	370
2015-08-14	ND	287
2015-08-14	ND	203
2015-08-14	ND	328
2015-08-15	ND	692
2015-08-15	ND	321
2015-08-15	ND	959
2015-08-15	ND	412
2015-08-15	ND	19
2015-08-15	ND	1516
2015-08-15	ND	1459
2015-08-15	ND	1143
2015-08-16	ND	473
2015-08-16	ND	ND
2015-08-16	ND	1483
2015-08-16	ND	685
2015-08-17	ND	680
2015-08-17	ND	704
2015-08-17	ND	1156
2015-08-17	ND	980
2015-08-17	ND	31
2015-08-17	ND	ND
2015-08-17	ND	49
2015-08-17	ND	1486
2015-08-17	ND	1453
2015-08-17	ND	843
2015-08-17	ND	187
2015-08-18	ND	679
2015-08-18	ND	1454
2015-08-18	ND	1454
2015-08-18	ND	1249
2015-08-18	ND	398
2015-08-18	ND	ND
2015-08-18	ND	680
2015-08-18	ND	1454
2015-08-18	ND	539
2015-08-18	ND	1461
2015-08-18	ND	807
2015-08-18	ND	579
2015-08-18	ND	501
2015-08-18	ND	363
2015-08-19	ND	349
2015-08-19	ND	1541
2015-08-19	ND	961
2015-08-19	ND	296
2015-08-19	ND	365
2015-08-19	ND	ND
2015-08-19	ND	1130
2015-08-19	ND	701
2015-08-19	ND	701
2015-08-19	ND	680
2015-08-20	ND	321
2015-08-20	ND	321
2015-08-20	ND	211
2015-08-20	ND	ND
2015-08-20	ND	764
2015-08-20	ND	207
2015-08-20	ND	1506
2015-08-20	ND	367
2015-08-20	ND	761
2015-08-20	ND	947
2015-08-20	ND	115
2015-08-20	B (some dehydration. ORS and observe at hospital)	431
2015-08-20	B (some dehydration. ORS and observe at hospital)	19
2015-08-21	ND	498
2015-08-21	ND	706
2015-08-21	ND	706
2015-08-21	ND	640
2015-08-21	A (no dehydration. Send home with ORS)	526
2015-08-21	A (no dehydration. Send home with ORS)	550
2015-08-21	A (no dehydration. Send home with ORS)	1282
2015-08-21	A (no dehydration. Send home with ORS)	ND
2015-08-21	A (no dehydration. Send home with ORS)	ND
2015-08-21	A (no dehydration. Send home with ORS)	526
2015-08-21	C (severe dehydration. IV fluids)	550
2015-08-22	ND	403
2015-08-22	ND	670
2015-08-22	ND	324
2015-08-22	ND	363
2015-08-22	ND	704
2015-08-22	ND	3
2015-08-22	ND	142
2015-08-22	ND	706
2015-08-22	ND	680
2015-08-22	A (no dehydration. Send home with ORS)	591
2015-08-22	A (no dehydration. Send home with ORS)	550
2015-08-22	A (no dehydration. Send home with ORS)	550
2015-08-22	C (severe dehydration. IV fluids)	445
2015-08-22	C (severe dehydration. IV fluids)	97
2015-08-22	C (severe dehydration. IV fluids)	410
2015-08-22	C (severe dehydration. IV fluids)	588
2015-08-23	ND	704
2015-08-23	ND	367
2015-08-23	ND	225
2015-08-23	ND	701
2015-08-23	ND	ND
2015-08-23	ND	498
2015-08-23	A (no dehydration. Send home with ORS)	524
2015-08-23	A (no dehydration. Send home with ORS)	376
2015-08-23	C (severe dehydration. IV fluids)	513
2015-08-23	C (severe dehydration. IV fluids)	579
2015-08-23	C (severe dehydration. IV fluids)	524
2015-08-23	C (severe dehydration. IV fluids)	410
2015-08-23	C (severe dehydration. IV fluids)	680
2015-08-24	ND	1444
2015-08-24	ND	1501
2015-08-24	ND	224
2015-08-24	ND	370
2015-08-24	ND	679
2015-08-24	A (no dehydration. Send home with ORS)	550
2015-08-24	A (no dehydration. Send home with ORS)	550
2015-08-24	A (no dehydration. Send home with ORS)	513
2015-08-24	A (no dehydration. Send home with ORS)	550
2015-08-24	A (no dehydration. Send home with ORS)	1287
2015-08-24	B (some dehydration. ORS and observe at hospital)	ND
2015-08-24	C (severe dehydration. IV fluids)	513
2015-08-24	C (severe dehydration. IV fluids)	513
2015-08-24	C (severe dehydration. IV fluids)	513
2015-08-25	ND	289
2015-08-25	ND	400
2015-08-25	ND	333
2015-08-25	ND	1112
2015-08-25	ND	1456
2015-08-25	ND	705
2015-08-25	ND	205
2015-08-25	B (some dehydration. ORS and observe at hospital)	431
2015-08-25	B (some dehydration. ORS and observe at hospital)	588
2015-08-25	C (severe dehydration. IV fluids)	513
2015-08-25	C (severe dehydration. IV fluids)	611
2015-08-25	C (severe dehydration. IV fluids)	513
2015-08-25	C (severe dehydration. IV fluids)	550
2015-08-25	C (severe dehydration. IV fluids)	ND
2015-08-26	ND	701
2015-08-26	ND	1471
2015-08-26	A (no dehydration. Send home with ORS)	431
2015-08-26	A (no dehydration. Send home with ORS)	513
2015-08-26	A (no dehydration. Send home with ORS)	599
2015-08-26	A (no dehydration. Send home with ORS)	1388
2015-08-26	A (no dehydration. Send home with ORS)	513
2015-08-26	B (some dehydration. ORS and observe at hospital)	431
2015-08-26	B (some dehydration. ORS and observe at hospital)	431
2015-08-26	C (severe dehydration. IV fluids)	579
2015-08-26	C (severe dehydration. IV fluids)	112
2015-08-26	C (severe dehydration. IV fluids)	513
2015-08-26	C (severe dehydration. IV fluids)	494
2015-08-26	C (severe dehydration. IV fluids)	ND
2015-08-26	C (severe dehydration. IV fluids)	508
2015-08-27	ND	ND
2015-08-27	ND	ND
2015-08-27	ND	225
2015-08-27	ND	ND
2015-08-27	ND	684
2015-08-27	ND	684
2015-08-27	ND	ND
2015-08-27	ND	263
2015-08-27	ND	211
2015-08-27	ND	365
2015-08-27	ND	1126
2015-08-27	A (no dehydration. Send home with ORS)	ND
2015-08-27	A (no dehydration. Send home with ORS)	ND
2015-08-27	A (no dehydration. Send home with ORS)	513
2015-08-27	A (no dehydration. Send home with ORS)	513
2015-08-27	A (no dehydration. Send home with ORS)	513
2015-08-27	A (no dehydration. Send home with ORS)	764
2015-08-27	A (no dehydration. Send home with ORS)	508
2015-08-27	A (no dehydration. Send home with ORS)	470
2015-08-27	A (no dehydration. Send home with ORS)	ND
2015-08-27	A (no dehydration. Send home with ORS)	ND
2015-08-27	A (no dehydration. Send home with ORS)	501
2015-08-27	A (no dehydration. Send home with ORS)	ND
2015-08-27	B (some dehydration. ORS and observe at hospital)	550
2015-08-27	B (some dehydration. ORS and observe at hospital)	ND
2015-08-27	B (some dehydration. ORS and observe at hospital)	431
2015-08-27	C (severe dehydration. IV fluids)	617
2015-08-27	C (severe dehydration. IV fluids)	513
2015-08-27	C (severe dehydration. IV fluids)	550
2015-08-27	C (severe dehydration. IV fluids)	ND
2015-08-27	C (severe dehydration. IV fluids)	601
2015-08-27	C (severe dehydration. IV fluids)	ND
2015-08-28	ND	705
2015-08-28	ND	685
2015-08-28	ND	680
2015-08-28	ND	ND
2015-08-28	A (no dehydration. Send home with ORS)	187
2015-08-28	A (no dehydration. Send home with ORS)	431
2015-08-28	B (some dehydration. ORS and observe at hospital)	ND
2015-08-28	C (severe dehydration. IV fluids)	ND
2015-08-29	ND	313
2015-08-29	A (no dehydration. Send home with ORS)	1287
2015-08-29	A (no dehydration. Send home with ORS)	582
2015-08-29	A (no dehydration. Send home with ORS)	187
2015-08-29	A (no dehydration. Send home with ORS)	162
2015-08-29	A (no dehydration. Send home with ORS)	ND
2015-08-29	A (no dehydration. Send home with ORS)	ND
2015-08-29	A (no dehydration. Send home with ORS)	ND
2015-08-29	A (no dehydration. Send home with ORS)	ND
2015-08-29	A (no dehydration. Send home with ORS)	569
2015-08-29	C (severe dehydration. IV fluids)	ND
2015-08-29	C (severe dehydration. IV fluids)	569
2015-08-29	C (severe dehydration. IV fluids)	ND
2015-08-29	C (severe dehydration. IV fluids)	569
2015-08-29	C (severe dehydration. IV fluids)	187
2015-08-29	C (severe dehydration. IV fluids)	ND
2015-08-30	ND	684
2015-08-30	ND	1475
2015-08-30	ND	1475
2015-08-30	ND	221
2015-08-30	B (some dehydration. ORS and observe at hospital)	1189
2015-08-30	B (some dehydration. ORS and observe at hospital)	457
2015-08-30	B (some dehydration. ORS and observe at hospital)	4
2015-08-30	C (severe dehydration. IV fluids)	19
2015-08-30	C (severe dehydration. IV fluids)	513
2015-08-31	ND	200
2015-08-31	ND	225
2015-08-31	ND	203
2015-08-31	ND	403
2015-08-31	ND	403
2015-08-31	ND	205
2015-08-31	ND	321
2015-08-31	ND	365
2015-08-31	ND	321
2015-08-31	A (no dehydration. Send home with ORS)	550
2015-08-31	B (some dehydration. ORS and observe at hospital)	ND
2015-08-31	C (severe dehydration. IV fluids)	705
2015-09-01	ND	ND
2015-09-01	ND	370
2015-09-01	ND	346
2015-09-01	ND	1158
2015-09-01	A (no dehydration. Send home with ORS)	ND
2015-09-01	A (no dehydration. Send home with ORS)	569
2015-09-01	A (no dehydration. Send home with ORS)	524
2015-09-01	A (no dehydration. Send home with ORS)	321
2015-09-01	A (no dehydration. Send home with ORS)	550
2015-09-01	A (no dehydration. Send home with ORS)	550
2015-09-01	A (no dehydration. Send home with ORS)	1287
2015-09-01	B (some dehydration. ORS and observe at hospital)	ND
2015-09-01	B (some dehydration. ORS and observe at hospital)	513
2015-09-01	C (severe dehydration. IV fluids)	ND
2015-09-01	C (severe dehydration. IV fluids)	ND
2015-09-01	C (severe dehydration. IV fluids)	ND
[truncated: 8,932 more rows]

## Sheet: Stool cultures_linelist
Date_sampling	V. cholerae O1 Result	Locality_ID
2015-03-20	Negative	ND
2017-08-14	Positive	ND
2015-05-14	Negative	ND
2015-07-21	Positive	728
2017-04-20	Negative	ND
2017-08-18	Negative	ND
2016-11-03	Negative	ND
2017-06-20	Positive	ND
2015-08-01	Positive	498
2016-05-31	Positive	227
2017-05-31	Negative	ND
2017-09-27	Negative	ND
2017-11-20	Negative	ND
2015-08-12	Positive	376
2017-05-17	Positive	294
2017-04-21	Negative	ND
2017-11-13	Negative	ND
2016-06-10	Positive	ND
2017-11-03	Positive	295
2016-08-31	Negative	ND
2016-03-02	Negative	ND
2016-06-11	Positive	253
2017-07-11	Negative	ND
2017-07-04	Positive	444
2017-05-13	Positive	675
2017-11-08	Negative	ND
2017-11-15	Negative	ND
2015-03-17	Negative	ND
2015-07-30	Positive	ND
2017-07-17	Positive	48
2017-06-27	Positive	283
2017-05-19	Negative	ND
2017-08-31	Negative	ND
2017-10-31	Negative	ND
2017-11-25	Positive	215
2015-10-14	Negative	ND
2015-08-05	Positive	376
2015-07-29	Negative	ND
2016-02-05	Negative	ND
2017-06-05	Negative	ND
2015-11-14	Positive	ND
2016-06-09	Positive	178
2016-02-19	Negative	ND
2016-03-01	Negative	ND
2016-05-29	Negative	ND
2016-06-13	Positive	307
2017-10-25	Positive	419
2017-08-07	Negative	ND
2017-07-27	Negative	ND
2017-10-11	Negative	ND
2017-11-03	Negative	ND
2016-01-08	Positive	ND
2015-03-24	Negative	ND
2015-03-20	Negative	ND
2015-07-09	Positive	ND
2015-07-24	Positive	ND
2017-06-23	Negative	ND
2016-03-02	Negative	ND
2017-08-22	Positive	303
2017-09-29	Positive	448
2015-05-14	Negative	ND
2015-11-13	Negative	ND
2015-11-23	Negative	ND
2017-07-02	Positive	444
2015-07-26	Positive	386
2017-07-17	Positive	64
2016-06-30	Positive	228
2017-05-11	Negative	ND
2017-08-16	Positive	ND
2017-11-13	Positive	1507
2015-04-07	Negative	ND
2015-07-16	Positive	ND
2017-02-19	Negative	ND
2015-08-14	Positive	331
2015-12-18	Negative	ND
2016-05-04	Negative	ND
2016-03-18	Positive	286
2015-05-14	Negative	ND
2016-06-17	Positive	150
2015-05-14	Negative	ND
2015-07-25	Positive	ND
2017-12-21	Positive	207
2015-06-10	Negative	ND
2015-11-24	Negative	ND
2017-05-10	Negative	ND
2015-11-13	Positive	ND
2015-08-13	Negative	ND
2015-08-11	Negative	ND
2015-10-02	Negative	ND
2016-01-31	Negative	ND
2016-02-28	Negative	ND
2017-11-13	Positive	257
2016-06-17	Positive	ND
2017-11-29	Positive	291
2017-04-18	Negative	ND
2016-10-10	Positive	309
2017-07-03	Negative	ND
2017-07-19	Positive	ND
2017-07-27	Positive	ND
2017-06-17	Positive	427
2017-06-18	Positive	432
2017-08-07	Negative	ND
2017-04-05	Positive	469
2017-08-01	Positive	553
2017-06-29	Positive	586
2017-10-22	Negative	ND
2015-05-14	Negative	ND
2015-05-14	Negative	ND
2016-05-09	Negative	ND
2016-05-11	Negative	ND
2017-11-30	Negative	ND
2015-11-19	Negative	ND
2016-05-28	Positive	225
2017-08-06	Negative	ND
2017-10-28	Negative	ND
2016-02-12	Negative	ND
2016-05-19	Positive	258
2017-02-23	Negative	ND
2015-05-14	Negative	ND
2017-06-29	Positive	93
2015-09-27	Negative	ND
2017-06-24	Negative	ND
2017-12-16	Negative	ND
2017-10-13	Positive	ND
2015-11-20	Negative	ND
2016-03-02	Negative	ND
2017-04-21	Negative	ND
2017-03-20	Negative	ND
2017-07-06	Positive	ND
2017-05-07	Positive	467
2015-08-13	Positive	516
2017-11-26	Negative	ND
2015-05-14	Negative	ND
2015-03-19	Positive	262
2015-07-17	Positive	364
2016-02-12	Negative	ND
2016-04-18	Negative	ND
2017-05-19	Negative	ND
2017-06-03	Positive	ND
2017-10-21	Positive	455
2017-10-12	Negative	ND
2017-10-10	Negative	ND
2016-06-24	Positive	ND
2015-05-14	Negative	ND
2017-06-19	Positive	117
2016-06-18	Positive	256
2016-06-10	Negative	ND
2017-02-11	Positive	ND
2017-04-19	Negative	ND
2017-07-01	Negative	ND
2017-07-10	Negative	ND
2016-06-13	Positive	221
2016-02-14	Negative	ND
2015-11-12	Positive	297
2017-05-07	Positive	ND
2017-06-21	Negative	ND
2017-07-17	Negative	ND
2017-06-27	Positive	460
2017-08-31	Negative	ND
2017-09-30	Negative	ND
2017-10-10	Negative	ND
2015-09-14	Negative	ND
2015-11-12	Negative	ND
2015-12-16	Negative	ND
2016-02-08	Negative	ND
2016-02-20	Negative	ND
2017-05-30	Negative	ND
2017-12-15	Negative	ND
2017-12-18	Negative	ND
2017-06-27	Positive	84
2016-05-27	Positive	207
2016-06-22	Positive	212
2016-07-16	Positive	214
2015-09-16	Negative	ND
2016-10-15	Positive	220
2016-07-10	Negative	ND
2016-10-11	Positive	ND
2017-03-15	Positive	ND
2016-10-12	Positive	313
2017-05-11	Positive	ND
2016-03-11	Positive	321
2017-07-12	Negative	ND
2017-08-03	Positive	473
2017-10-10	Negative	ND
2015-05-14	Negative	ND
2015-08-01	Negative	ND
2015-07-21	Positive	723
2017-10-26	Positive	221
2016-05-10	Negative	ND
2015-09-17	Positive	363
2017-07-02	Negative	ND
2015-05-14	Negative	ND
2016-05-31	Positive	215
2017-03-16	Positive	ND
2017-07-05	Negative	ND
2015-03-23	Positive	324
2015-08-08	Negative	ND
2015-08-08	Negative	ND
2016-03-03	Negative	ND
2016-04-17	Negative	ND
2016-05-14	Negative	ND
2016-03-04	Positive	ND
2016-05-28	Positive	300
2017-05-19	Negative	ND
2017-10-01	Positive	438
2017-10-20	Negative	ND
2017-11-25	Positive	ND
2015-07-27	Positive	31
2016-06-09	Positive	211
2015-11-25	Negative	ND
2016-05-28	Negative	ND
2016-06-18	Positive	ND
2017-07-18	Positive	42
2015-08-12	Negative	ND
2016-05-17	Negative	ND
2016-05-24	Negative	ND
2016-07-28	Positive	271
2017-11-13	Positive	287
2016-08-20	Negative	ND
2017-01-24	Positive	ND
2017-10-09	Positive	321
2017-01-24	Positive	415
2017-08-11	Negative	ND
2017-08-31	Negative	ND
2017-06-28	Positive	ND
2016-02-05	Positive	ND
2015-05-14	Negative	ND
2015-05-16	Negative	ND
2017-08-22	Positive	64
2016-05-30	Positive	221
2017-11-03	Positive	1015
2017-07-09	Positive	283
2017-07-20	Negative	ND
2017-07-20	Negative	ND
2017-07-08	Negative	ND
2017-05-13	Positive	ND
2015-03-30	Positive	211
2015-12-15	Negative	ND
2017-05-25	Positive	241
2017-04-25	Negative	ND
2017-05-12	Negative	ND
2017-07-20	Negative	ND
2017-11-16	Negative	ND
2015-07-30	Negative	ND
2016-05-30	Positive	217
2016-03-13	Negative	ND
2016-06-25	Positive	287
2016-06-25	Positive	293
2016-06-13	Positive	307
2015-05-14	Negative	ND
2015-07-20	Positive	ND
2016-03-30	Positive	224
2015-11-14	Negative	ND
2016-03-09	Negative	ND
2016-04-18	Negative	ND
2017-10-27	Positive	294
2016-06-07	Positive	210
2015-07-14	Negative	ND
2016-01-08	Negative	ND
2016-06-09	Positive	225
2016-05-30	Positive	258
2017-10-04	Positive	291
2016-05-10	Negative	ND
2017-04-20	Negative	ND
2017-03-16	Positive	ND
2017-05-22	Negative	ND
2017-06-14	Negative	ND
2017-05-19	Negative	ND
2017-11-16	Positive	364
2017-07-07	Positive	ND
2017-07-26	Negative	ND
2017-11-20	Positive	ND
2015-07-14	Positive	271
2015-07-30	Positive	303
2016-06-12	Positive	221
2016-05-15	Negative	ND
2016-05-23	Negative	ND
2015-10-10	Positive	289
2017-01-24	Negative	ND
2017-11-29	Negative	ND
2015-07-30	Positive	532
2017-07-19	Positive	64
2015-11-05	Negative	ND
2016-03-29	Negative	ND
2017-12-16	Positive	272
2016-06-14	Positive	ND
2017-05-25	Positive	303
2017-06-06	Positive	342
2017-07-17	Negative	ND
2017-07-21	Negative	ND
2017-11-27	Negative	ND
2016-02-06	Positive	ND
2016-02-06	Positive	ND
2015-05-14	Negative	ND
2015-07-22	Negative	ND
2015-11-14	Negative	ND
2017-11-01	Positive	285
2017-05-10	Negative	ND
2017-05-11	Negative	ND
2017-06-01	Negative	ND
2015-08-04	Positive	376
2017-07-28	Negative	ND
2017-10-28	Negative	ND
2017-11-03	Negative	ND
2017-11-01	Negative	ND
2017-11-02	Negative	ND
2015-07-21	Positive	287
2015-09-30	Negative	ND
2015-11-25	Negative	ND
2017-11-09	Positive	251
2016-04-15	Positive	ND
2017-11-10	Positive	251
2017-07-24	Positive	ND
2017-07-31	Negative	ND
2017-10-07	Negative	ND
2017-08-09	Positive	ND
2017-10-02	Positive	ND
2015-03-30	Negative	ND
2015-07-24	Positive	488
2015-08-05	Negative	ND
2017-10-03	Positive	219
2016-02-03	Negative	ND
2016-05-24	Negative	ND
2017-06-26	Positive	258
2016-06-28	Positive	262
2016-06-11	Negative	ND
2016-06-13	Positive	ND
2017-06-27	Negative	ND
2017-07-24	Positive	ND
2017-08-14	Positive	ND
2015-08-13	Positive	532
2015-08-13	Positive	690
2017-11-13	Positive	ND
2017-11-13	Negative	ND
2017-10-03	Positive	ND
2015-07-16	Negative	ND
2015-07-16	Positive	ND
2017-11-09	Positive	51
2015-10-15	Negative	ND
2015-12-16	Negative	ND
2017-05-11	Positive	ND
2017-06-14	Negative	ND
2017-06-23	Negative	ND
2017-11-16	Negative	ND
2016-05-29	Positive	217
2016-05-30	Positive	217
2016-05-25	Positive	225
2017-11-20	Positive	241
2017-11-06	Positive	287
2017-12-19	Positive	303
2016-11-27	Negative	ND
2017-03-15	Positive	ND
2017-06-25	Negative	ND
2015-07-26	Positive	405
2017-07-17	Negative	ND
2017-08-22	Negative	ND
2015-07-23	Negative	ND
2015-07-29	Positive	364
2016-05-28	Positive	195
2017-11-09	Positive	195
2017-11-10	Positive	195
2017-11-04	Positive	224
2017-05-19	Positive	262
2016-09-01	Negative	ND
2017-12-18	Positive	303
2017-12-19	Positive	303
2016-05-06	Positive	356
2017-10-17	Positive	390
2017-12-19	Negative	ND
2017-12-14	Negative	ND
2015-07-30	Negative	ND
2015-08-13	Negative	ND
2015-11-14	Negative	ND
2015-11-19	Positive	ND
2016-07-09	Positive	ND
2016-05-10	Positive	ND
2017-02-12	Positive	ND
2017-05-20	Negative	ND
2017-05-30	Negative	ND
2017-06-11	Negative	ND
2015-08-13	Positive	550
2017-07-17	Positive	1507
2015-11-16	Positive	ND
2017-12-14	Negative	ND
2017-12-18	Negative	ND
2016-06-23	Positive	200
2017-06-25	Positive	219
2017-06-26	Positive	219
2016-06-03	Positive	225
2015-08-09	Positive	241
2016-06-12	Positive	263
2017-07-08	Positive	721
2017-10-17	Negative	ND
2017-10-19	Negative	ND
2016-02-04	Positive	ND
2017-05-23	Positive	225
2015-11-10	Positive	241
2016-05-30	Positive	259
2017-07-06	Positive	283
2017-11-27	Positive	283
2017-11-27	Positive	283
2015-10-10	Positive	287
2017-10-05	Positive	289
2016-09-04	Negative	ND
2016-07-14	Positive	307
2017-01-25	Negative	ND
2017-08-14	Negative	ND
2017-11-15	Positive	1507
2017-08-18	Positive	764
2015-07-26	Positive	31
2015-03-17	Positive	229
2015-07-20	Positive	1507
2015-07-23	Positive	729
2016-06-09	Positive	156
2015-11-09	Negative	ND
2016-06-28	Positive	223
2017-05-24	Positive	225
2016-03-21	Positive	ND
2016-05-11	Negative	ND
2016-06-30	Negative	ND
2017-03-06	Negative	ND
2017-05-16	Negative	ND
2017-05-19	Negative	ND
2015-09-23	Positive	363
2017-05-07	Positive	473
2017-12-20	Negative	ND
2015-03-17	Positive	323
2015-07-14	Positive	722
2015-12-02	Negative	ND
2017-12-20	Positive	225
2017-08-23	Positive	302
2017-04-05	Positive	ND
2017-05-05	Negative	ND
2017-07-06	Negative	ND
2017-07-12	Negative	ND
2017-05-16	Positive	566
2017-08-08	Positive	611
2017-10-26	Negative	ND
2017-11-13	Negative	ND
2017-12-14	Negative	ND
2015-03-31	Negative	ND
2015-05-14	Negative	ND
2015-07-21	Positive	767
2015-10-28	Positive	2
2016-07-09	Positive	195
2015-10-10	Negative	ND
2015-10-17	Negative	ND
2016-03-03	Negative	ND
2016-05-25	Positive	303
2016-10-10	Positive	ND
2016-10-22	Negative	ND
2017-05-29	Positive	ND
2017-05-27	Negative	ND
2017-10-03	Negative	ND
2015-11-19	Positive	ND
2015-07-29	Negative	ND
2017-08-18	Positive	42
2016-06-22	Positive	ND
2015-08-10	Negative	ND
2015-08-08	Negative	ND
2015-09-16	Negative	ND
2015-11-16	Negative	ND
2015-12-07	Negative	ND
2016-02-29	Negative	ND
2016-03-01	Negative	ND
2016-04-16	Negative	ND
2017-06-25	Positive	258
2017-11-21	Positive	277
2016-05-26	Positive	289
2016-11-03	Positive	ND
2016-05-28	Positive	316
2016-03-21	Positive	321
2017-06-18	Negative	ND
2017-06-29	Negative	ND
2017-07-19	Negative	ND
2017-08-01	Negative	ND
2017-08-17	Negative	ND
2017-10-26	Negative	ND
2017-10-10	Positive	ND
2015-12-19	Positive	ND
2015-03-22	Negative	ND
2015-07-24	Positive	762
2017-10-30	Positive	198
2015-09-26	Negative	ND
2015-11-11	Negative	ND
2016-06-01	Positive	223
2015-12-15	Negative	ND
2016-04-18	Negative	ND
2016-05-16	Negative	ND
2016-05-17	Negative	ND
2016-05-25	Positive	267
2016-08-20	Negative	ND
2017-05-25	Negative	ND
2017-07-19	Negative	ND
2015-07-26	Positive	6
2015-10-28	Positive	9
2015-07-20	Negative	ND
2015-09-18	Negative	ND
2016-02-24	Negative	ND
2015-11-08	Positive	262
2016-08-26	Positive	ND
2017-05-19	Negative	ND
2017-05-27	Negative	ND
2017-10-01	Positive	429
2015-08-13	Positive	679
2015-07-08	Positive	ND
2015-07-23	Positive	398
2017-10-27	Positive	198
2016-06-11	Positive	221
2016-02-16	Positive	ND
2016-04-07	Positive	232
2016-03-29	Negative	ND
2016-05-16	Negative	ND
2016-04-21	Positive	321
2015-11-13	Positive	ND
2015-03-20	Negative	ND
2015-05-16	Negative	ND
2015-07-25	Negative	ND
2015-07-23	Positive	ND
2015-10-21	Positive	131
2016-06-12	Positive	217
2016-06-16	Positive	221
2017-07-01	Positive	221
2016-06-01	Positive	224
2016-05-11	Negative	ND
2016-05-10	Negative	ND
2016-09-29	Negative	ND
2017-10-12	Positive	313
2017-05-20	Negative	ND
2015-09-19	Positive	363
2017-08-14	Positive	ND
2015-11-15	Positive	ND
2017-11-21	Negative	ND
2016-02-02	Positive	ND
2017-12-15	Negative	ND
2015-05-07	Negative	ND
2015-07-31	Positive	514
2015-08-04	Positive	3
2015-08-05	Negative	ND
2017-04-05	Positive	239
2016-05-12	Negative	ND
2016-07-24	Negative	ND
2017-02-21	Positive	ND
2017-03-15	Positive	ND
2016-05-24	Positive	309
2017-07-31	Negative	ND
2017-06-18	Positive	432
2017-08-16	Positive	ND
2015-12-29	Positive	ND
2016-02-01	Positive	ND
2016-02-18	Positive	ND
2017-12-19	Negative	ND
2015-07-14	Positive	ND
2015-07-24	Negative	ND
2016-06-02	Positive	205
2017-12-20	Positive	207
2015-08-11	Negative	ND
2016-05-31	Positive	217
2015-09-15	Negative	ND
2016-02-26	Negative	ND
2016-04-18	Negative	ND
2017-10-10	Positive	258
2016-06-22	Negative	ND
2016-06-01	Positive	297
2017-11-29	Positive	303
2016-09-15	Negative	ND
2016-05-30	Positive	311
2016-05-25	Positive	321
2017-06-14	Negative	ND
2017-07-19	Positive	ND
2017-07-19	Negative	ND
2017-07-19	Positive	ND
2017-09-18	Positive	ND
2017-10-26	Negative	ND
2017-08-01	Positive	724
2017-11-12	Negative	ND
2015-07-18	Positive	ND
2017-11-09	Positive	51
2017-08-07	Positive	117
2017-12-15	Positive	205
2015-08-11	Negative	ND
2017-08-23	Positive	214
2017-10-03	Positive	283
2016-06-11	Positive	ND
2016-06-18	Negative	ND
2016-06-09	Negative	ND
2016-10-15	Negative	ND
2016-07-16	Positive	308
2017-04-03	Positive	ND
2017-05-07	Negative	ND
2017-05-17	Negative	ND
2017-07-28	Negative	ND
2017-09-26	Negative	ND
2017-10-02	Negative	ND
2017-06-02	Positive	544
2017-07-06	Positive	1507
2017-10-14	Negative	ND
2017-11-16	Negative	ND
2015-11-15	Positive	ND
2017-08-05	Positive	ND
2017-12-15	Negative	ND
2015-05-14	Negative	ND
2015-07-15	Positive	756
2016-04-18	Positive	184
2017-10-27	Positive	207
2016-05-29	Positive	225
2016-02-04	Negative	ND
2016-03-30	Negative	ND
2017-05-25	Positive	280
2017-11-28	Positive	287
2017-11-29	Positive	288
2016-08-01	Negative	ND
2016-12-14	Positive	ND
2017-05-23	Negative	ND
2017-11-08	Positive	321
2017-05-26	Positive	ND
2017-11-16	Positive	324
2015-08-08	Positive	376
2017-07-30	Negative	ND
2017-08-14	Positive	ND
2017-11-22	Positive	225
2017-11-22	Positive	225
2016-04-05	Negative	ND
2016-05-25	Positive	258
2016-03-05	Positive	ND
2017-11-27	Positive	279
2016-06-11	Negative	ND
2016-06-01	Positive	289
2017-04-27	Positive	ND
2017-08-31	Negative	ND
2016-06-09	Positive	700
2016-02-04	Negative	ND
2016-02-23	Negative	ND
2017-06-04	Positive	283
2017-06-07	Negative	ND
2016-08-20	Positive	330
2017-07-12	Negative	ND
2017-09-29	Positive	537
2017-10-06	Negative	ND
2015-03-19	Negative	ND
2015-05-14	Negative	ND
2015-07-09	Positive	ND
2015-07-09	Positive	ND
2015-07-15	Positive	ND
2015-09-21	Negative	ND
2017-08-04	Positive	223
2016-02-23	Positive	251
2016-11-03	Positive	ND
2016-11-03	Negative	ND
2017-02-19	Negative	ND
2015-08-13	Positive	509
2015-07-08	Positive	ND
2017-07-18	Positive	42
2017-09-13	Positive	42
2015-11-19	Negative	ND
2015-12-28	Negative	ND
2016-02-19	Negative	ND
2017-10-11	Positive	277
2016-06-24	Negative	ND
2016-06-24	Positive	308
2017-04-26	Negative	ND
2017-07-06	Negative	ND
2017-07-06	Negative	ND
2017-09-13	Negative	ND
2017-10-06	Negative	ND
2017-11-26	Positive	224
2016-01-31	Negative	ND
2016-12-02	Positive	241
2016-06-27	Positive	268
2017-04-20	Negative	ND
2017-05-07	Negative	ND
2017-06-02	Negative	ND
2017-05-27	Negative	ND
2017-07-30	Positive	ND
2017-07-17	Negative	ND
2017-08-06	Positive	ND
2015-08-11	Positive	498
2016-06-09	Positive	714
2017-12-27	Negative	ND
2017-10-03	Positive	ND
2017-12-16	Positive	206
2015-11-16	Negative	ND
2016-02-24	Negative	ND
2016-05-30	Positive	1025
2016-03-04	Positive	ND
2017-06-27	Positive	270
2017-05-21	Negative	ND
2017-11-20	Negative	ND
2015-08-02	Negative	ND
2017-07-11	Positive	60
2016-06-27	Positive	200
2015-07-17	Positive	ND
2017-08-23	Positive	214
2016-03-01	Positive	289
2017-05-30	Negative	ND
2017-06-02	Negative	ND
2015-10-11	Positive	324
2017-08-02	Positive	418
2017-08-14	Negative	ND
2015-07-14	Positive	567
2017-10-29	Negative	ND
2017-10-22	Negative	ND
2017-10-14	Negative	ND
2015-11-15	Positive	ND
2017-11-20	Negative	ND
2015-10-21	Positive	963
2015-07-26	Negative	ND
2015-09-13	Negative	ND
2017-12-17	Positive	221
2015-12-11	Negative	ND
2016-06-02	Positive	255
2016-06-29	Positive	262
2016-05-10	Negative	ND
2016-11-03	Positive	ND
2017-06-15	Negative	ND
2017-08-31	Negative	ND
2017-11-06	Negative	ND
2017-11-23	Negative	ND
2017-12-16	Negative	ND
2015-09-26	Negative	ND
2015-10-01	Negative	ND
2015-10-14	Negative	ND
2017-10-28	Positive	223
2016-11-03	Positive	224
2016-05-03	Positive	ND
2017-11-04	Positive	289
2016-06-30	Positive	297
2016-05-10	Negative	ND
2017-05-23	Negative	ND
2017-06-14	Negative	ND
2017-06-22	Positive	ND
2017-08-02	Positive	ND
2015-09-16	Positive	503
2017-10-19	Negative	ND
2017-11-07	Negative	ND
2017-10-16	Negative	ND
2017-11-06	Negative	ND
2017-11-18	Negative	ND
2017-11-28	Negative	ND
2016-02-18	Positive	ND
2015-10-21	Positive	131
2017-12-19	Positive	217
2017-11-25	Positive	221
2015-11-21	Negative	ND
2017-07-07	Positive	239
2016-03-04	Negative	ND
2016-05-30	Negative	ND
2016-06-10	Positive	ND
2016-06-10	Negative	ND
2017-11-02	Positive	299
2016-08-01	Negative	ND
2016-08-15	Negative	ND
2016-11-27	Negative	ND
2017-02-04	Negative	ND
2017-05-20	Negative	ND
2017-10-12	Positive	418
2017-01-24	Positive	463
2017-11-09	Negative	ND
2017-12-14	Negative	ND
2017-06-17	Positive	ND
2015-10-21	Positive	131
2015-01-10	Negative	ND
2015-09-26	Negative	ND
2015-11-08	Negative	ND
2016-05-31	Positive	225
2016-02-12	Negative	ND
2016-06-11	Positive	258
2016-05-19	Positive	281
2016-06-09	Negative	ND
2016-06-25	Negative	ND
2016-08-01	Negative	ND
2016-11-03	Positive	ND
2017-05-07	Negative	ND
2016-05-26	Positive	319
2017-06-05	Negative	ND
2017-10-26	Positive	321
2017-06-21	Positive	ND
2017-06-23	Negative	ND
2015-07-16	Positive	390
2016-05-05	Positive	399
2016-05-10	Positive	407
2017-10-21	Positive	413
2017-08-07	Negative	ND
2017-08-14	Positive	ND
2017-10-02	Negative	ND
2017-10-01	Negative	ND
2015-08-11	Positive	689
2017-11-20	Negative	ND
2016-02-18	Positive	ND
2016-07-09	Positive	205
2015-08-01	Negative	ND
2015-07-14	Negative	ND
2015-07-13	Negative	ND
2016-10-25	Positive	221
2015-11-21	Negative	ND
2015-11-25	Negative	ND
2016-06-08	Positive	225
2016-06-09	Positive	253
2015-11-21	Positive	287
2017-11-08	Positive	287
2016-06-07	Positive	300
2016-07-19	Positive	ND
2016-10-11	Negative	ND
2017-04-25	Negative	ND
2017-05-28	Negative	ND
2015-11-12	Positive	322
2017-05-31	Negative	ND
2017-06-13	Negative	ND
2017-10-02	Positive	415
2017-07-28	Positive	ND
2017-09-30	Negative	ND
2017-11-03	Negative	ND
2017-10-30	Negative	ND
2017-10-22	Negative	ND
2017-11-20	Negative	ND
2015-11-15	Positive	ND
2017-11-18	Negative	ND
2017-06-06	Positive	ND
2017-12-16	Negative	ND
2017-08-22	Positive	ND
2017-12-12	Negative	ND
2015-08-03	Negative	ND
2017-07-17	Positive	42
2017-07-19	Positive	42
2017-12-18	Positive	209
2015-08-11	Negative	ND
2015-08-12	Negative	ND
2015-10-07	Negative	ND
2015-09-19	Negative	ND
2015-11-13	Negative	ND
2015-11-17	Negative	ND
2015-11-23	Negative	ND
2016-06-02	Positive	225
2016-04-18	Negative	ND
2016-04-16	Negative	ND
2016-06-01	Positive	252
2016-06-27	Positive	287
2016-06-10	Negative	ND
2016-12-15	Positive	287
2017-11-08	Positive	287
2016-06-22	Positive	ND
2017-11-27	Positive	287
2016-06-27	Negative	ND
2017-05-21	Positive	307
2017-05-22	Positive	307
2017-02-23	Negative	ND
2017-03-15	Positive	ND
2017-03-15	Positive	ND
2017-05-22	Negative	ND
2017-05-22	Negative	ND
2017-05-17	Negative	ND
2017-06-01	Negative	ND
2017-06-03	Negative	ND
2017-07-26	Negative	ND
2017-07-09	Negative	ND
2017-07-04	Negative	ND
2017-10-12	Positive	472
2015-11-14	Positive	656
2017-11-08	Negative	ND
2017-10-13	Negative	ND
2017-10-12	Negative	ND
2017-11-10	Negative	ND
2015-10-28	Positive	ND
2017-11-20	Negative	ND
2015-11-25	Positive	ND
2015-10-21	Positive	131
2015-10-21	Positive	131
2016-06-01	Positive	205
2017-07-31	Positive	208
2015-10-01	Negative	ND
2016-02-19	Negative	ND
2016-03-01	Negative	ND
2016-03-27	Negative	ND
2016-04-18	Negative	ND
2016-04-18	Negative	ND
2016-05-26	Negative	ND
2016-05-31	Positive	278
2016-05-30	Negative	ND
2016-03-26	Positive	287
2016-06-24	Positive	287
2017-11-20	Positive	287
2017-10-29	Positive	299
2017-04-27	Negative	ND
2017-05-05	Positive	ND
2015-05-11	Negative	ND
2017-05-22	Negative	ND
2017-05-17	Negative	ND
2017-10-12	Positive	321
2017-05-26	Negative	ND
2017-06-03	Positive	ND
2017-06-02	Negative	ND
2017-06-04	Negative	ND
2017-06-05	Positive	ND
2017-06-26	Negative	ND
2015-08-04	Positive	376
2017-07-29	Negative	ND
2017-08-16	Negative	ND
2017-05-10	Positive	452
2015-08-13	Positive	514
2017-09-30	Negative	ND
2015-08-13	Positive	564
2015-08-13	Positive	703
2017-10-10	Negative	ND
2017-11-20	Negative	ND
2017-11-27	Negative	ND
2017-12-16	Negative	ND
2017-11-29	Positive	221
2016-05-05	Positive	371
2017-10-04	Positive	1506
2017-11-23	Positive	ND
2017-05-31	Negative	ND
2017-10-10	Negative	ND
2017-11-01	Negative	ND
2017-10-12	Positive	999
2015-11-25	Negative	ND
2017-10-12	Positive	257
2017-05-23	Negative	ND
2015-07-26	Positive	535
2017-08-09	Negative	ND
2017-08-22	Positive	64
2015-07-22	Negative	ND
2015-10-02	Negative	ND
2016-07-15	Negative	ND
2017-06-23	Positive	ND
2017-06-24	Negative	ND
2015-08-13	Positive	516
2015-05-14	Negative	ND
2015-05-14	Negative	ND
2015-07-14	Positive	ND
2015-03-20	Positive	241
2016-06-10	Negative	ND
2016-06-09	Negative	ND
2016-06-25	Negative	ND
2016-05-10	Negative	ND
2016-05-12	Negative	ND
2015-07-23	Positive	ND
2017-06-07	Positive	408
2016-06-01	Positive	205
2016-06-02	Positive	217
2016-06-01	Positive	223
2017-05-12	Positive	ND
2017-05-18	Negative	ND
2017-11-30	Negative	ND
2015-09-08	Negative	ND
2016-05-07	Positive	ND
2017-05-08	Negative	ND
2017-05-12	Negative	ND
2016-04-06	Negative	ND
2016-03-22	Positive	287
2016-02-04	Negative	ND
2016-02-19	Negative	ND
2017-02-16	Negative	ND
2017-10-12	Negative	ND
2016-02-03	Positive	ND
2015-07-22	Positive	287
2017-07-25	Positive	ND
2015-09-25	Negative	ND
2015-11-21	Negative	ND
2015-11-19	Negative	ND
2017-04-18	Negative	ND
2015-09-25	Positive	352
2017-09-13	Positive	ND
2017-07-10	Positive	1376
2015-09-14	Positive	371
2017-06-24	Positive	ND
2017-05-12	Negative	ND
2017-05-24	Negative	ND
2015-08-11	Negative	ND
2015-08-01	Negative	ND
2017-05-12	Negative	ND
2017-05-22	Negative	ND
2015-05-14	Negative	ND
2015-05-14	Negative	ND
2015-05-16	Negative	ND
2015-11-17	Negative	ND
2016-02-19	Negative	ND
2016-02-29	Negative	ND
2016-05-16	Positive	195
2015-09-27	Negative	ND
2015-10-06	Negative	ND
2017-05-22	Negative	ND
2017-05-22	Negative	ND
2017-05-21	Negative	ND
2015-09-29	Negative	ND
2017-04-27	Negative	ND
2017-04-29	Negative	ND
2017-06-10	Negative	ND
2015-11-15	Positive	659
2017-05-22	Positive	659
2015-12-18	Negative	ND
2017-02-28	Negative	ND
2017-02-23	Negative	ND
2017-02-23	Negative	ND
2016-02-24	Negative	ND
2016-02-20	Negative	ND
2017-08-31	Negative	ND
2015-09-09	Negative	ND
2015-11-23	Negative	ND
2015-10-10	Positive	287
2015-09-08	Positive	370
2017-12-16	Negative	ND
2016-04-05	Negative	ND
2017-11-28	Positive	291
2017-05-24	Positive	659
2017-11-02	Positive	998
2017-11-06	Positive	287
2016-10-10	Positive	ND
2017-05-16	Negative	ND
2017-07-18	Positive	ND
2017-10-12	Negative	ND
2017-11-02	Negative	ND
2017-11-10	Negative	ND
2015-12-03	Negative	ND
2017-05-07	Negative	ND
2015-11-17	Negative	ND
2017-05-20	Negative	ND
2017-07-31	Negative	ND
2015-08-11	Positive	ND
2015-07-28	Negative	ND
2015-07-31	Positive	ND
2015-07-23	Negative	ND
2016-07-20	Positive	315
2015-07-22	Positive	335
2017-08-04	Negative	ND
2017-08-07	Negative	ND
2015-03-30	Negative	ND
2015-04-01	Negative	ND
2017-06-28	Positive	221
2017-06-27	Positive	279
2017-06-27	Negative	ND
2017-07-19	Negative	ND
2015-03-23	Negative	ND
2015-07-29	Positive	754
2017-05-19	Negative	ND
2017-06-04	Negative	ND
2015-07-22	Positive	501
2015-07-25	Negative	ND
2015-07-23	Positive	762
2016-05-08	Positive	ND
2017-05-12	Negative	ND
2017-05-27	Negative	ND
2015-07-24	Negative	ND
2015-07-17	Positive	323
2015-07-22	Positive	1507
2015-07-08	Positive	1514
2015-05-14	Negative	ND
2015-07-20	Positive	ND
2015-09-17	Negative	ND
2015-10-01	Positive	606
2015-05-14	Negative	ND
2015-07-10	Positive	ND
2015-03-23	Positive	287
2015-07-08	Positive	ND
2016-03-04	Negative	ND
2016-02-20	Positive	253
2017-02-17	Negative	ND
2017-05-22	Negative	ND
2017-07-27	Negative	ND
2015-03-18	Negative	ND
2015-07-16	Positive	ND
2015-07-25	Negative	ND
2015-05-14	Negative	ND
2015-07-21	Negative	ND
2015-07-17	Negative	ND
2015-03-23	Positive	225
2015-07-28	Positive	380
2015-12-11	Negative	ND
2017-05-22	Negative	ND
2017-06-02	Negative	ND
2015-07-24	Positive	ND

## Sheet: CATIs_list
Date_intervention	Locality_ID	CATI with EMIRA ?	Decontamination (no.of houses)	Education (no. of people)	Chlorine distribution (no. of households)	Antibiotic prophylaxis (no. of people)
2016-10-21	ND	0	2	3	2	8
2015-12-26	11	1	8	85	8	0
2016-05-18	769	1	10	20	10	46
2016-12-23	769	0	2	66	2	ND
2016-07-23	11	0	3	9	3	0
2016-10-12	11	1	2	20	6	31
2017-07-12	1	1	4	71	13	26
2016-05-24	769	1	3	20	5	30
2016-06-23	ND	1	6	44	6	17
2016-09-20	772	1	6	15	6	16
2016-06-30	772	1	19	67	23	47
2016-07-22	772	0	6	13	6	0
2016-07-23	772	0	3	9	3	0
2016-06-23	ND	1	1	6	1	6
2017-02-24	ND	0	3	12	5	ND
2017-03-10	774	0	2	257	20	ND
2017-03-10	774	0	2	257	20	0
2016-08-16	2	1	6	25	6	16
2016-11-10	2	1	1	3	1	3
2015-10-29	2	1	18	186	18	0
2015-12-05	2	1	8	68	8	0
2016-01-05	2	1	4	45	4	0
2016-05-18	2	1	8	25	10	54
2016-06-29	2	1	7	18	7	18
2016-07-11	2	0	10	16	11	0
2016-07-23	2	0	2	15	2	0
2016-05-12	2	0	0	26	8	0
2015-12-09	776	1	7	76	7	0
2016-02-27	776	1	0	28	3	0
2016-10-27	776	1	6	15	8	20
2016-06-28	776	1	9	44	9	37
2016-06-29	776	1	1	5	1	2
2016-11-05	777	0	8	65	14	45
2017-02-21	3	0	1	45	10	ND
2017-02-24	3	0	1	37	11	ND
2017-03-08	3	0	3	115	9	ND
2017-03-13	3	0	2	19	6	ND
2017-02-24	3	0	8	23	8	ND
2016-11-16	3	1	5	7	3	15
2016-10-08	3	0	4	14	4	0
2016-11-07	ND	0	5	10	5	0
2016-05-12	779	0	0	17	4	0
2016-12-22	10	0	5	38	5	ND
2017-03-29	785	0	2	43	12	ND
2016-05-24	785	1	9	41	17	67
2016-08-19	786	1	13	56	13	56
2015-10-29	7	1	33	337	33	0
2016-11-05	7	0	1	6	0	1
2016-09-12	7	1	0	28	11	42
2016-09-28	7	1	3	11	3	13
2016-10-10	7	1	7	21	8	29
2016-09-21	787	1	4	15	4	7
2015-12-02	8	1	5	45	5	0
2016-10-27	8	1	4	11	4	16
2016-07-11	8	0	6	21	6	0
2015-12-25	ND	1	5	47	5	0
2015-10-30	9	1	11	70	11	0
2016-07-11	9	0	2	5	2	0
2015-11-02	7	0	5	48	5	0
2016-11-05	790	0	3	11	3	15
2015-11-02	790	0	4	29	4	0
2016-07-10	790	0	4	12	5	0
2016-11-07	776	0	2	10	7	0
2016-05-21	ND	1	3	6	3	14
2016-12-05	11	0	1	15	9	ND
2016-12-05	11	0	2	14	3	ND
2016-10-12	11	1	13	26	16	72
2016-07-02	11	1	9	20	9	24
2016-10-15	ND	0	2	2	2	0
2017-02-16	14	0	0	110	0	ND
2016-05-18	769	1	4	13	4	11
2016-07-05	797	1	2	14	2	9
2016-01-05	798	1	2	20	2	0
2016-10-15	795	1	6	19	6	0
2017-07-11	796	1	3	55	12	31
2016-02-27	796	1	0	40	24	0
2017-05-30	13	0	9	0	34	0
2017-06-05	13	1	3	37	8	27
2017-02-17	14	0	0	46	0	ND
2017-02-21	14	0	2	53	11	ND
2017-03-04	14	0	3	57	12	ND
2017-02-17	14	0	1	60	11	ND
2016-11-15	ND	0	1	3	1	3
2016-09-02	803	1	8	25	8	32
2016-09-12	803	1	6	22	9	30
2016-09-15	803	1	7	30	11	36
2016-09-16	803	1	1	8	1	1
2016-11-08	803	1	2	10	2	14
2016-02-17	803	1	3	30	3	0
2016-07-28	ND	1	1	7	1	0
2016-10-27	806	1	7	15	7	0
2016-11-10	807	1	3	7	3	15
2016-06-28	807	1	4	29	4	28
2015-12-02	ND	1	7	131	14	0
2017-09-11	31	0	1	57	18	16
2016-11-07	31	0	2	3	2	0
2015-10-28	ND	1	11	148	11	0
2016-10-27	4	0	1	17	1	ND
2015-12-02	776	1	5	132	13	0
2015-12-28	11	1	8	90	8	0
2016-08-02	818	1	2	6	2	3
2016-08-04	818	1	2	2	1	4
2016-11-05	818	0	2	9	3	14
2016-11-07	811	0	2	3	2	0
2016-09-16	810	1	3	10	3	11
2016-09-21	811	1	2	3	2	4
2016-08-29	811	1	1	3	1	3
2016-08-31	811	1	1	3	1	3
2016-09-02	811	1	4	23	4	5
2016-09-27	811	1	4	12	4	11
2016-09-28	811	1	4	14	4	18
2016-10-21	811	0	2	3	2	8
2016-06-28	20	1	3	8	3	9
2016-07-10	811	0	4	15	6	0
2015-12-04	811	1	4	34	4	0
2015-11-05	820	0	5	54	5	0
2016-06-29	820	1	4	14	4	10
2015-11-04	24	0	13	159	13	0
2015-12-19	24	1	4	43	4	0
2015-12-26	24	1	18	215	21	0
2016-01-05	24	1	5	51	5	0
2016-06-29	24	1	4	10	4	20
2016-10-08	24	0	2	3	2	0
2016-08-02	ND	1	3	6	3	6
2016-02-17	831	1	7	64	7	0
2016-09-20	827	1	4	16	4	17
2016-11-07	827	0	2	2	2	0
2016-11-08	827	1	4	16	4	17
2016-06-29	827	1	3	31	3	11
2016-07-11	827	0	2	10	2	0
2015-11-02	827	0	2	26	2	0
2016-08-02	829	1	6	11	6	16
2016-09-12	829	1	0	13	2	16
2016-09-15	829	1	3	12	4	10
2016-10-08	829	0	2	7	2	0
2016-11-08	829	1	4	13	4	22
2016-11-10	829	1	2	10	2	6
2016-05-18	829	1	2	5	2	7
2016-06-22	829	1	9	21	9	22
2015-12-09	829	1	10	115	10	0
2016-10-15	830	1	5	10	5	0
2016-10-21	831	0	2	10	7	23
2017-01-23	26	0	2	37	13	ND
2016-10-05	26	0	0	23	6	0
2016-11-14	26	1	1	2	1	0
2015-12-19	26	1	5	47	5	0
2015-12-22	26	1	7	72	7	0
2016-08-16	833	1	2	13	3	12
2016-05-31	833	1	16	50	16	63
2016-08-19	834	1	9	50	9	44
2015-11-02	834	0	16	133	16	0
2016-05-18	ND	1	3	13	3	12
2016-05-26	ND	1	19	96	21	40
2016-08-19	835	1	4	12	4	16
2016-09-02	835	1	4	22	4	14
2016-09-30	835	1	3	8	3	7
2016-11-08	835	1	1	4	1	2
2015-12-23	830	1	5	50	5	0
2016-06-29	830	1	4	12	4	15
2015-12-05	ND	1	4	47	8	0
2016-09-27	850	1	11	31	11	41
2016-10-05	850	0	0	2	2	0
2016-08-16	837	1	5	17	5	14
2016-08-31	837	1	0	10	2	6
2016-08-24	838	1	24	112	24	87
2016-08-29	838	1	1	2	1	2
2016-09-16	838	1	9	17	12	28
2016-09-17	838	1	2	6	2	0
2016-09-19	838	1	5	25	5	7
2016-09-22	838	0	3	50	60	0
2016-10-19	838	1	5	8	5	13
2017-02-24	ND	0	5	30	6	ND
2016-06-28	ND	1	3	35	3	5
2016-07-05	ND	1	1	22	1	10
2016-05-18	ND	1	7	11	5	17
2016-06-28	27	1	6	11	6	31
2016-08-22	27	1	6	25	6	31
2016-11-17	27	0	2	4	2	0
2015-12-22	27	1	6	67	6	0
2016-06-28	27	1	11	54	11	34
2016-01-05	ND	1	2	18	2	0
2015-12-04	839	1	12	102	12	0
2017-07-11	839	1	3	53	11	25
2016-12-02	839	0	1	9	5	ND
2016-01-08	839	1	5	47	5	0
2016-05-18	839	1	7	12	7	21
2016-06-29	839	1	1	5	1	4
2015-12-25	846	1	14	145	14	0
2017-03-27	845	0	1	29	9	ND
2016-12-15	2	0	1	6	1	ND
2016-12-14	7	0	0	27	9	ND
2016-12-30	2	0	1	10	1	ND
2016-08-31	ND	1	0	7	3	15
2015-12-09	ND	1	9	94	9	0
2016-11-08	ND	0	1	39	7	ND
2016-11-08	ND	0	1	4	1	ND
2016-07-28	849	0	4	36	4	0
2016-06-23	849	1	1	6	3	7
2016-09-27	ND	1	7	15	7	20
2016-04-19	ND	1	0	26	3	0
2017-02-16	3	0	2	43	12	ND
2016-06-28	3	1	4	10	4	19
2017-01-05	ND	0	1	41	13	ND
2016-05-18	769	1	7	26	9	18
2016-06-23	853	1	3	7	3	8
2016-09-20	ND	1	6	10	6	8
2016-10-05	856	0	0	4	6	0
2016-06-22	856	1	10	19	10	39
2016-05-21	ND	1	2	11	2	12
2016-08-02	861	1	5	7	5	17
2016-08-03	861	1	1	20	2	5
2016-08-04	861	1	3	5	2	5
2016-07-22	861	0	9	14	9	0
2016-11-08	33	0	1	39	7	ND
2016-11-07	33	0	6	19	6	0
2016-01-12	ND	1	1	13	1	0
2016-09-30	867	1	3	11	3	15
2016-06-30	868	1	8	34	10	29
2015-10-30	867	1	12	80	12	0
2017-11-12	870	1	4	37	13	21
2017-11-09	ND	1	4	36	11	35
2016-12-22	ND	0	1	11	6	ND
2017-07-19	34	1	5	58	10	15
2017-07-19	34	1	4	61	9	21
2017-07-22	34	0	11	108	11	0
2017-07-31	34	0	3	46	20	0
2017-07-31	34	0	3	100	18	0
2017-08-01	34	0	2	96	19	ND
2017-08-10	34	0	5	125	30	ND
2017-08-17	34	0	4	103	22	ND
2016-11-12	871	0	1	6	1	1
2016-08-10	872	0	0	0	0	ND
2017-07-10	35	0	5	97	20	0
2016-07-29	35	1	4	14	4	19
2016-07-14	35	1	7	20	7	17
2016-11-16	36	0	5	12	5	0
2017-08-14	36	1	3	98	17	25
2017-12-11	36	1	1	25	8	25
2017-09-26	46	1	5	106	16	45
2016-12-20	106	0	1	28	7	ND
2017-08-15	873	1	3	98	19	30
2017-11-06	873	1	8	82	22	44
2017-12-02	ND	1	2	29	9	11
2017-08-03	38	0	2	102	19	ND
2017-08-06	38	1	3	90	19	20
2017-08-05	38	1	3	88	16	17
2017-08-05	38	1	6	166	32	96
2017-08-05	38	1	4	108	16	19
2017-08-16	38	1	11	61	15	51
2017-08-16	38	1	6	30	6	25
2017-04-26	38	0	2	54	9	ND
2017-09-20	38	0	5	110	20	ND
2017-10-16	875	1	7	149	34	47
2017-08-23	40	0	5	48	13	0
2017-09-12	40	1	4	221	17	42
2017-01-30	40	0	1	9	6	ND
2017-02-23	40	0	2	64	11	ND
2017-08-12	40	0	4	58	16	ND
2017-08-12	40	0	9	93	17	ND
2017-08-12	40	0	5	52	11	ND
2017-08-12	40	0	4	48	13	ND
2017-08-14	40	0	5	100	20	ND
2017-08-14	40	0	6	123	8	ND
2017-08-15	40	1	3	160	40	42
2017-08-16	40	0	8	108	21	ND
2017-08-17	40	0	9	82	16	ND
2017-08-17	40	0	6	56	12	ND
2016-10-22	40	0	0	10	2	6
2016-05-12	40	1	14	45	14	37
2017-03-14	879	0	20	116	20	ND
2017-03-14	879	0	20	116	20	0
2017-03-09	879	0	3	45	9	ND
2017-03-09	879	0	3	45	9	0
2017-03-09	879	0	1	50	12	ND
2017-03-09	879	0	1	50	12	0
2017-12-01	1500	1	4	76	24	27
2016-03-22	1500	1	7	54	457	0
2016-08-05	42	0	0	0	0	ND
2017-02-13	ND	0	2	28	6	ND
2017-07-31	882	0	5	38	17	0
2017-09-06	43	0	0	120	0	54
2017-09-15	43	1	3	67	13	48
2017-09-15	43	1	8	153	57	56
2017-10-13	43	1	6	69	17	26
2017-11-20	43	1	1	31	1	3
2017-12-24	43	0	3	23	7	0
2017-11-09	43	1	35	285	0	243
2017-10-06	ND	0	9	90	29	0
2017-09-14	44	1	2	175	27	15
2017-10-10	44	1	11	192	48	38
2017-07-19	44	1	8	80	14	20
2017-07-21	44	1	2	70	14	14
2017-07-21	44	1	3	94	18	0
2017-07-25	44	1	5	98	19	15
2017-03-09	ND	0	1	35	8	ND
2017-03-09	ND	0	1	35	8	0
2017-08-15	883	1	6	48	13	11
2017-04-05	883	0	2	103	10	ND
2016-07-12	44	1	4	30	4	28
2016-07-13	885	1	2	4	2	7
2017-05-12	886	1	2	26	5	ND
2017-08-30	46	0	0	87	17	0
2017-09-06	46	0	7	83	15	0
2017-09-06	46	0	8	81	13	0
2017-09-06	46	0	9	92	18	0
2017-09-10	46	1	25	290	58	102
2017-09-10	46	1	15	275	55	156
2017-08-05	887	0	4	73	14	ND
2017-10-02	46	0	4	74	17	0
2017-10-03	46	0	3	56	12	0
2017-09-19	46	0	7	94	18	0
2017-09-19	46	0	6	77	15	0
2017-10-12	46	1	9	100	23	56
2017-10-09	48	1	10	149	38	66
2017-07-19	49	1	5	70	9	10
2017-07-19	49	1	4	48	9	23
2017-07-21	49	1	4	114	24	12
2017-08-03	49	0	5	47	11	ND
2017-08-14	49	1	3	32	22	32
2017-08-16	49	0	3	102	20	ND
2016-08-12	49	0	7	17	7	0
2016-07-13	49	1	1	1	1	4
2016-07-13	49	1	1	2	1	4
2016-07-22	49	1	9	13	9	22
2017-04-19	50	0	2	84	10	ND
2016-10-22	50	0	0	7	3	15
2016-07-13	50	1	1	5	1	5
2017-01-30	51	0	3	9	4	ND
2017-11-10	51	1	3	27	9	20
2017-11-30	51	1	3	0	10	27
2017-11-30	51	1	0	87	0	73
2017-07-12	51	1	2	102	16	0
2017-07-20	51	1	15	87	45	75
2017-10-23	53	0	3	85	14	0
2017-08-25	889	1	2	130	30	18
2016-07-19	889	1	2	6	2	0
2017-04-27	889	1	8	30	8	25
2016-04-16	54	1	17	151	19	0
2017-10-31	56	1	6	45	15	11
2016-12-01	56	0	2	8	3	ND
2017-08-06	63	0	3	57	24	ND
2017-08-17	896	0	4	67	11	ND
2016-11-15	59	0	3	8	3	7
2017-03-20	59	0	2	126	17	ND
2017-03-22	59	0	1	106	11	ND
2017-03-23	59	0	2	78	8	ND
2017-03-23	59	0	3	66	10	ND
2017-04-24	59	1	3	45	6	22
2016-10-22	61	0	1	3	1	3
2017-07-12	60	0	4	102	19	0
2016-10-27	60	1	5	8	5	13
2017-01-31	60	0	2	17	8	ND
2017-04-15	60	0	6	76	13	ND
2016-11-05	60	0	2	7	2	3
2017-07-22	61	1	6	210	31	34
2016-04-24	ND	1	0	26	203	0
2017-01-10	41	0	1	25	13	ND
2017-01-13	41	0	1	6	1	ND
2017-01-04	879	0	2	50	20	ND
2016-12-27	68	0	2	19	2	ND
2017-04-08	894	0	1	6	6	ND
2017-05-05	894	0	4	107	11	ND
2017-01-25	62	0	4	26	11	ND
2016-08-10	ND	0	0	0	0	ND
2017-02-17	895	0	3	44	9	ND
2017-02-17	895	0	1	29	7	ND
2017-11-15	ND	1	0	25	13	0
2017-12-01	ND	0	5	115	19	0
2017-08-22	64	1	0	52	52	52
2017-08-24	64	1	2	60	15	35
2017-08-25	64	1	6	39	15	17
2017-12-04	64	1	3	41	9	42
2017-12-05	64	1	1	21	10	35
2017-03-27	64	0	4	104	17	ND
2017-04-08	64	0	2	0	5	ND
2017-05-15	64	1	10	63	15	45
2017-07-04	64	1	3	33	13	10
2017-07-17	64	0	5	109	18	0
2017-07-18	64	1	6	104	26	9
2017-08-14	64	1	2	32	10	32
2016-07-09	64	1	4	17	4	10
2016-07-25	64	1	5	11	5	18
2017-01-12	64	0	0	10	10	ND
2017-08-16	ND	0	2	79	17	ND
2017-12-01	ND	1	3	34	10	0
2017-02-21	66	0	2	68	11	ND
2017-09-13	67	1	7	75	15	45
2017-09-13	67	1	8	96	14	44
2017-09-15	67	1	1	108	30	18
2017-09-20	67	0	6	76	19	0
2017-04-03	67	0	3	95	14	ND
2017-04-21	67	0	1	94	12	ND
2017-07-19	67	1	5	75	10	17
2016-07-12	67	1	2	4	2	10
2016-07-26	67	1	3	31	3	15
2017-02-08	68	0	2	36	7	ND
2017-02-20	68	0	2	52	10	ND
2017-03-22	68	0	1	67	8	ND
2017-06-27	68	0	0	114	0	0
2017-06-30	68	1	7	126	21	19
2017-07-03	68	0	4	102	15	0
2017-07-06	68	1	4	96	11	4
2017-07-19	68	1	1	23	8	6
2017-08-04	68	0	5	57	11	ND
2017-08-17	68	0	6	84	16	ND
2016-04-24	68	1	0	28	4	0
2017-02-16	68	0	1	9	3	ND
2016-09-17	68	1	2	5	2	0
2016-10-12	68	1	6	19	6	24
2016-07-04	68	1	6	11	6	13
2016-07-09	68	1	6	14	6	0
2016-07-19	68	1	9	19	9	37
2016-07-22	68	1	16	50	16	63
2016-07-26	68	1	8	25	8	6
2017-07-15	69	0	2	73	20	0
2016-07-19	69	1	2	3	2	3
2017-08-05	71	0	2	65	13	ND
2016-07-02	72	1	0	1	1	3
2016-07-12	72	1	6	16	6	15
2017-09-15	72	0	0	73	0	0
2017-09-16	72	1	4	71	37	61
2017-10-09	72	1	5	75	25	18
2017-09-15	72	1	3	53	17	22
2017-07-17	72	0	3	102	19	0
2017-08-06	902	0	7	50	13	ND
2017-08-16	73	1	3	67	15	26
2017-03-27	73	0	2	26	11	ND
2017-09-18	74	0	7	102	34	0
2016-08-05	74	0	0	0	0	ND
2016-08-05	74	0	0	0	0	ND
2016-08-08	74	1	2	10	2	11
2017-07-31	77	0	4	175	35	0
2017-08-03	77	0	2	106	17	ND
2017-08-15	77	1	2	76	17	5
2017-11-16	43	0	1	50	1	0
2017-01-31	75	0	2	13	6	ND
2017-06-21	75	1	3	75	12	22
2017-08-05	75	0	7	52	12	ND
2017-08-18	75	0	5	90	15	ND
2017-07-17	76	0	2	95	17	0
2017-10-31	905	1	5	54	18	14
2017-12-04	78	1	4	86	17	61
2017-07-27	78	0	3	88	20	0
2017-08-09	78	0	2	90	13	ND
2017-10-05	906	0	8	103	34	0
2017-07-19	907	1	3	33	13	10
2017-06-13	907	0	3	76	18	0
2017-04-18	80	0	2	130	11	ND
2017-01-06	ND	0	4	98	52	ND
2017-11-30	ND	1	6	252	28	0
2017-08-03	118	0	3	84	16	ND
2017-08-07	118	0	5	58	11	ND
2017-08-21	81	1	3	70	11	11
2017-12-05	81	0	0	91	15	0
2017-09-26	46	1	6	78	19	29
2017-12-11	81	1	5	88	12	22
2017-12-13	81	1	6	49	16	22
2017-02-03	911	0	2	31	10	ND
2017-05-19	84	0	14	150	24	ND
2017-07-24	44	0	5	87	17	0
2016-08-25	45	0	0	0	0	ND
2017-08-08	86	0	5	50	14	ND
2017-08-01	86	0	4	68	14	0
2017-09-21	87	0	6	47	15	0
2017-07-13	91	0	4	99	20	0
2017-04-27	92	0	4	91	13	ND
2017-06-29	93	1	3	53	10	11
2017-08-25	93	0	6	95	21	0
2017-04-10	94	1	2	98	13	12
2017-09-10	95	1	5	209	16	14
2017-04-25	ND	0	3	63	7	ND
2017-08-18	915	0	4	72	17	31
2017-03-09	ND	0	1	47	7	ND
2017-03-09	ND	0	1	47	7	0
2017-09-08	ND	1	10	105	17	10
2017-07-28	99	0	5	58	12	0
2017-03-02	101	0	2	60	8	ND
2017-08-22	101	1	7	63	12	10
2016-07-12	101	1	2	6	2	5
2017-07-04	102	1	4	101	18	14
2017-04-24	103	0	2	74	10	ND
2017-07-11	103	0	2	80	16	0
2017-07-13	103	0	2	67	16	0
2017-07-28	103	0	4	72	15	0
2017-08-07	103	0	7	76	26	ND
2017-04-24	103	0	2	74	10	ND
2017-06-26	84	0	3	70	0	0
2017-06-27	84	0	2	82	12	0
2017-02-02	ND	0	2	51	13	ND
2017-10-24	49	1	5	76	19	12
2016-08-05	ND	1	2	10	6	20
2017-09-21	923	0	7	86	17	0
2017-08-03	923	0	7	82	18	ND
2017-10-02	104	0	4	76	18	0
2017-03-16	104	1	2	75	11	15
2017-03-21	104	0	2	76	10	ND
2017-03-11	104	0	2	40	8	ND
2017-03-11	104	0	2	40	8	0
2017-09-09	106	1	6	145	18	10
2017-09-09	106	1	7	176	25	13
2017-09-09	106	1	3	169	14	11
2017-09-11	106	1	1	28	3	16
2017-09-11	106	1	1	21	2	10
2017-09-11	106	1	2	133	12	17
2017-03-25	106	0	3	114	13	ND
2017-11-18	108	0	1	36	1	0
2017-07-10	109	0	4	86	18	0
2016-09-24	109	0	4	6	4	0
2016-02-03	109	1	1	11	1	0
2016-03-21	109	1	5	62	309	0
2016-03-21	109	1	3	20	3	0
2016-07-02	928	1	1	7	2	8
2017-04-28	110	0	3	47	9	ND
2017-07-13	110	0	3	106	18	0
2017-07-31	110	0	7	98	17	0
2017-08-04	110	0	13	83	19	ND
2017-11-13	115	1	5	53	12	17
2017-07-26	115	0	7	93	19	0
2017-08-11	115	0	3	102	27	ND
2016-07-02	115	1	0	1	1	0
2017-08-02	926	0	3	150	15	ND
2017-03-09	926	0	2	34	8	ND
2017-03-09	926	0	2	34	8	0
2017-11-04	929	1	6	90	18	29
2017-11-22	929	0	4	0	0	11
2017-11-24	929	1	5	18	0	0
2017-04-20	117	1	2	90	16	41
2017-06-06	117	1	5	85	25	26
2017-06-13	117	0	4	79	26	ND
2017-06-14	117	0	4	108	12	0
2017-06-19	117	1	3	80	13	44
2017-06-22	117	1	4	95	11	36
2017-07-19	117	1	3	59	14	17
2017-07-24	117	1	4	108	23	24
2017-08-08	117	0	4	54	19	ND
2017-08-08	117	0	2	49	12	ND
2017-08-12	117	0	6	94	22	ND
2017-08-12	117	0	7	67	13	ND
2017-08-14	117	1	3	70	10	7
2017-08-14	117	1	4	94	20	23
2017-08-17	117	1	3	136	20	15
2017-08-17	117	1	5	98	19	14
2017-08-18	117	1	5	140	23	16
2017-08-18	117	1	2	84	16	61
2017-06-22	117	1	5	119	14	30
2017-08-06	117	1	3	102	20	17
2017-08-07	117	0	6	55	22	ND
2017-08-09	117	0	3	78	18	ND
2017-08-14	117	1	2	87	15	ND
2017-06-24	117	0	1	15	4	0
2017-03-10	117	0	1	38	8	ND
2017-03-10	117	0	1	84	15	ND
2017-03-10	117	0	1	38	8	0
2017-03-10	117	0	1	84	15	0
2017-05-30	117	0	9	67	18	0
2017-06-27	117	0	3	96	0	0
2017-07-21	119	1	4	64	15	20
2016-06-01	69	1	4	14	4	12
2017-09-14	ND	0	4	70	14	0
2017-08-18	938	1	4	83	18	29
2017-01-31	57	0	0	22	9	ND
2017-02-13	57	0	2	75	11	ND
2017-08-22	940	1	4	98	16	33
2017-07-17	53	0	4	112	20	0
2017-09-09	57	0	8	109	27	0
2017-09-09	57	1	8	120	26	75
2017-09-13	57	1	15	192	64	ND
2017-09-19	57	0	6	80	17	0
2017-09-19	57	0	5	116	23	0
2017-09-19	57	0	8	102	26	0
2017-10-02	57	0	4	68	19	0
2017-11-16	57	0	0	38	0	ND
2017-11-20	57	1	1	43	1	5
2017-12-18	57	1	4	38	10	0
2017-04-25	57	0	1	70	10	ND
2016-06-01	121	1	6	27	9	22
2016-07-29	942	1	3	43	3	10
2016-11-05	942	0	4	11	4	18
2016-07-14	942	1	3	5	3	7
2017-04-26	122	0	4	65	10	ND
2017-09-25	945	1	4	58	14	34
2017-02-13	945	0	2	27	5	ND
2017-03-24	123	0	2	66	10	ND
2017-05-04	123	0	2	88	10	ND
2017-08-01	948	1	3	45	10	10
2017-03-16	124	0	3	44	10	ND
2017-05-17	125	0	4	130	20	ND
2015-10-21	131	1	20	260	27	0
2017-12-01	133	1	4	20	4	8
2015-10-21	136	1	16	134	16	0
2015-09-25	ND	1	2	27	3	0
2016-09-30	138	1	2	3	2	8
2016-03-13	ND	1	3	27	4	0
2016-10-14	140	1	6	6	6	19
2016-05-18	140	1	7	18	7	30
2016-06-11	150	1	4	9	4	13
2016-12-02	150	1	6	15	6	23
2017-02-17	150	1	1	18	6	29
2017-03-08	150	1	5	19	5	16
2017-04-12	150	1	1	18	4	14
2017-04-18	150	1	6	22	6	22
2016-03-07	151	1	3	29	4	0
2016-03-11	151	1	8	63	108	0
2016-08-09	959	1	5	15	5	25
2017-01-06	959	1	2	3	2	0
2016-08-18	142	1	3	7	2	10
2016-12-27	142	1	4	16	4	18
2017-03-28	142	1	2	8	2	2
2017-05-29	142	1	3	32	4	24
2016-08-09	ND	1	2	3	2	8
2016-05-25	ND	1	17	61	17	78
2017-01-06	145	1	2	2	2	0
2016-05-13	ND	1	3	13	3	12
2017-04-18	145	1	0	7	1	4
2016-11-23	145	1	0	3	1	7
2016-08-18	145	1	0	2	1	2
2016-01-13	ND	1	3	30	3	0
2016-01-28	ND	1	4	37	4	0
2017-02-14	ND	1	15	27	15	61
2016-05-18	147	1	2	6	2	7
2016-05-20	147	1	27	101	32	102
2016-05-23	147	1	13	30	13	31
2017-03-28	147	1	7	68	7	34
2017-07-03	147	1	2	17	2	10
2017-06-25	147	0	1	3	1	ND
2016-02-21	147	1	5	13	16	0
2016-06-01	ND	1	4	15	4	14
2017-02-12	151	0	9	24	9	0
2017-02-15	151	1	11	24	12	61
2017-02-21	151	1	10	31	10	38
2017-03-07	151	1	8	80	12	31
2017-03-08	151	1	8	58	6	51
2017-03-17	151	1	8	17	8	33
2017-04-04	151	1	1	2	1	1
2017-04-11	151	1	10	71	12	38
2017-04-22	151	1	6	40	5	12
2017-05-02	151	1	10	55	10	27
2017-05-26	151	1	1	9	1	6
2016-02-05	151	1	2	19	2	0
2016-03-29	151	1	0	7	1	0
2016-04-06	151	1	7	49	7	0
2016-04-08	151	1	3	30	3	0
2016-04-15	151	1	7	59	7	0
2016-04-26	151	1	9	76	9	0
2016-07-12	151	0	12	29	12	31
2017-09-13	152	1	4	26	4	17
2016-04-15	152	1	2	82	4	0
2016-12-05	153	1	9	24	9	33
2017-08-01	153	1	1	83	12	55
2015-11-26	153	1	8	119	13	0
2015-09-07	154	1	7	124	11	0
2017-07-04	965	1	10	53	10	33
2015-11-26	ND	1	8	68	8	0
2017-02-24	149	1	1	5	1	3
2017-03-13	150	1	6	28	6	28
2016-04-12	165	1	2	16	2	0
2016-10-22	ND	0	5	20	5	16
2017-04-25	ND	1	2	11	2	10
2016-06-26	ND	1	9	16	9	40
2016-12-02	970	1	2	4	2	2
2017-05-17	971	1	5	75	13	31
2016-11-26	968	1	3	6	3	0
2016-08-02	969	1	4	9	4	12
2016-12-29	ND	1	7	12	7	21
2017-05-13	973	0	3	9	3	ND
2016-08-17	156	1	2	7	2	8
2017-05-02	140	1	1	7	1	5
2017-05-20	140	0	3	12	3	ND
2016-01-06	140	1	3	25	3	0
2016-11-12	976	0	6	19	6	0
2016-11-15	976	1	5	22	5	30
2016-04-18	976	1	2	24	2	0
2016-04-15	158	1	2	36	5	0
2017-05-23	158	1	1	9	1	8
2016-06-11	158	1	7	12	7	32
2016-11-26	160	1	5	13	5	0
2016-11-30	160	1	1	2	1	4
2016-06-23	160	1	3	14	5	16
2016-09-24	161	0	5	14	5	19
2016-12-23	161	1	9	24	9	33
2017-03-03	161	1	5	12	0	29
2017-03-09	161	1	7	23	7	35
2017-05-12	161	0	2	9	2	ND
2016-03-29	161	1	4	42	4	0
2016-06-10	161	1	3	9	3	13
2016-01-26	ND	1	2	25	2	0
2016-02-20	ND	1	10	23	2	0
2017-05-03	166	1	2	2	2	9
2016-04-15	162	1	2	19	2	0
2017-10-21	ND	1	5	23	5	ND
2016-06-17	ND	1	17	37	17	79
2016-06-23	ND	1	19	62	19	70
2016-06-24	ND	1	0	4	0	0
2016-06-26	ND	1	10	28	10	36
2016-07-18	ND	1	10	50	10	37
2017-03-22	ND	1	5	29	5	25
2017-05-03	ND	1	6	33	6	33
2016-01-26	ND	1	16	184	16	0
2016-01-28	ND	1	12	123	12	0
2016-03-30	167	1	14	101	614	0
2016-04-18	977	1	4	37	4	0
2016-10-21	165	1	5	10	5	0
2016-12-15	165	1	5	11	5	12
2016-03-23	165	1	2	34	120	0
2016-03-31	165	1	5	41	405	0
2016-04-12	165	1	4	38	4	0
2017-04-07	166	1	0	3	1	0
2017-06-29	166	1	3	18	3	7
2017-07-04	166	1	0	10	2	9
2016-09-13	162	1	3	8	3	22
2017-05-12	162	0	1	3	1	ND
2017-03-10	ND	1	8	74	12	50
2016-01-05	ND	1	15	162	15	0
2017-01-06	167	1	6	19	6	0
2016-03-16	ND	1	1	9	151	0
2016-06-23	168	1	1	5	1	7
2016-01-06	163	1	1	32	401	0
2017-08-18	170	1	4	31	4	10
2017-11-09	171	1	8	53	8	24
2016-11-12	171	0	2	2	2	0
2016-12-23	171	1	7	17	7	24
2017-07-19	171	1	5	36	5	25
2016-05-20	172	1	7	41	7	24
2017-02-23	174	1	4	12	4	14
2017-06-09	172	1	3	23	3	21
2017-06-28	172	1	5	37	5	18
2017-10-09	172	1	9	24	9	22
2017-02-17	183	1	3	7	4	20
2017-06-29	173	1	1	4	1	1
2016-12-08	173	1	4	15	4	0
2016-08-09	173	1	9	21	9	11
2017-07-03	174	1	11	70	11	25
2017-08-29	174	1	8	50	8	41
2016-06-01	174	1	9	24	9	26
2015-12-16	ND	1	4	75	7	0
2016-10-21	175	1	6	19	6	0
2016-11-23	175	1	4	13	4	29
2016-11-26	175	1	7	27	7	0
2017-01-06	175	1	2	3	2	0
2017-03-09	175	1	2	12	2	14
2017-03-17	175	1	7	13	7	8
2017-04-04	175	1	6	45	7	32
2017-04-11	175	1	2	48	7	25
2017-04-18	175	1	10	54	11	35
2017-04-25	175	1	1	8	0	0
2017-05-02	175	1	7	37	7	27
2017-05-26	175	1	4	28	4	22
2017-06-28	175	1	2	16	2	12
2016-03-11	175	1	8	74	8	0
2016-03-29	175	1	0	6	1	0
2016-04-08	175	1	4	32	4	0
2016-04-18	175	1	6	52	6	0
2016-04-18	175	1	4	37	5	0
2016-07-12	175	1	8	20	8	18
2016-03-07	175	1	11	119	214	0
2016-02-05	ND	1	1	12	1	0
2017-03-22	176	1	1	9	1	8
2016-06-10	176	1	2	3	2	3
2016-06-19	178	1	1	7	1	9
2016-05-13	ND	1	13	34	13	40
2016-04-28	ND	1	4	13	1	0
2016-09-13	982	1	10	10	4	15
2016-03-16	982	1	1	7	1	0
2017-01-27	180	1	4	7	4	21
2016-03-13	180	1	5	47	505	0
2016-01-06	ND	1	1	60	404	0
2017-03-08	181	1	6	51	13	31
2016-05-18	181	1	4	8	4	16
2016-08-02	182	1	3	10	3	8
2016-09-29	182	1	6	23	6	24
2017-02-28	182	1	7	33	7	0
2017-03-03	182	1	1	1	0	2
2017-03-23	182	1	5	26	5	24
2017-08-12	182	1	1	4	1	ND
2015-12-16	182	1	3	95	8	0
2016-04-11	182	1	4	30	4	0
2016-04-26	182	1	3	49	5	0
2016-07-02	182	1	6	20	6	18
2015-12-16	182	1	4	75	5	0
2016-12-05	183	1	7	17	7	24
2017-03-07	183	1	4	39	4	22
2017-06-02	183	1	6	39	6	33
2016-10-29	184	0	1	6	0	1
2017-11-14	184	1	1	5	1	ND
2016-06-10	184	1	7	21	7	30
2016-06-19	184	1	3	11	3	10
2016-06-28	184	1	5	27	5	29
2017-10-21	180	1	3	15	3	ND
2017-08-12	150	1	1	5	1	ND
2016-10-21	150	1	2	2	2	0
2017-03-09	150	1	6	11	6	31
2016-02-05	150	1	17	166	17	0
2016-03-13	150	1	5	44	5	0
2017-10-17	150	1	5	56	14	33
2016-04-26	150	1	7	59	7	0
2016-03-29	ND	1	0	7	1	0
2016-03-31	ND	1	1	9	1	0
2016-03-31	ND	1	2	16	302	0
2016-06-24	186	1	10	67	10	39
2016-09-13	187	1	4	16	4	19
2015-09-07	187	1	8	96	8	0
2016-11-14	187	1	2	4	2	5
2017-10-21	187	1	12	89	12	ND
2016-03-29	187	1	5	40	5	0
2016-08-05	188	1	4	12	4	24
2016-11-15	188	1	4	9	4	19
2017-01-10	188	1	1	1	1	0
2017-03-13	188	1	7	37	7	34
2017-06-01	188	1	15	121	20	67
2016-04-06	188	1	1	13	1	0
2016-06-11	188	1	6	14	6	23
2016-07-12	188	1	9	18	9	23
2016-08-19	986	1	3	8	3	0
2016-08-17	987	1	2	7	2	8
2017-05-23	987	1	1	6	1	ND
2016-01-13	189	1	12	126	12	0
2017-05-29	ND	1	2	12	2	11
2016-01-13	ND	1	1	10	1	0
2016-04-11	ND	1	2	15	2	0
2016-01-05	190	1	13	107	13	0
2016-06-23	190	1	16	85	16	61
2016-06-24	190	1	0	12	0	0
2016-06-26	190	1	20	52	20	78
2016-03-29	990	1	0	7	1	0
2016-07-24	990	0	2	5	2	0
2016-06-22	190	1	22	118	22	88
2015-11-24	191	1	27	291	27	0
2016-06-24	191	1	11	64	11	0
2016-11-23	192	1	0	2	1	7
2016-04-06	192	1	1	7	1	0
2017-11-10	195	1	0	11	3	9
2017-11-03	195	1	5	20	5	7
2017-11-11	195	1	3	8	3	ND
2017-12-05	195	1	1	5	1	ND
2017-12-09	195	1	1	7	1	6
2017-12-18	195	1	2	4	2	8
2016-06-27	ND	1	7	28	7	34
2017-10-30	198	1	7	38	7	20
2017-12-04	ND	1	1	20	1	ND
2017-07-24	992	1	5	30	5	16
2017-10-20	992	1	7	30	7	23
2017-11-28	992	1	4	21	4	24
2016-03-28	993	1	9	78	10	0
2016-11-04	200	1	5	12	5	14
2017-03-04	200	0	1	8	1	6
2017-05-15	200	1	8	54	10	28
2017-05-24	200	1	6	26	6	20
2016-01-27	200	1	6	64	6	0
2015-10-07	200	1	6	60	6	0
2016-06-24	200	1	8	12	8	27
2016-07-12	ND	1	1	4	1	2
2016-11-18	201	1	2	4	2	5
2016-11-21	201	1	5	8	5	11
2016-12-14	201	1	4	15	8	20
2017-07-11	201	1	3	39	3	13
2015-11-27	201	1	3	37	3	0
2016-01-07	201	1	4	43	4	0
2016-07-04	201	1	5	8	5	14
2016-10-25	202	1	4	5	4	15
2016-12-12	202	1	2	5	2	9
2016-06-28	202	1	5	13	5	20
2017-07-03	202	1	7	29	7	23
2016-02-01	993	1	5	123	10	0
2016-02-09	993	1	3	27	3	0
2016-04-22	993	1	1	9	1	0
2015-08-24	296	1	3	129	14	0
2017-05-16	204	1	2	9	2	7
2017-06-23	204	1	4	22	4	16
2017-06-26	204	1	3	16	3	8
2017-07-17	204	1	2	12	2	7
2015-03-05	204	1	19	61	19	40
2016-12-19	205	1	4	11	4	16
2017-05-02	205	1	4	29	5	20
2017-05-22	205	1	2	6	2	5
2017-05-23	205	1	3	15	3	9
2017-06-14	205	1	11	37	11	29
2017-08-16	205	1	2	12	2	11
2017-09-01	205	1	10	39	10	25
2017-10-02	205	1	6	28	6	25
2017-11-14	205	1	10	50	10	25
2017-11-19	205	1	3	10	3	7
2017-11-21	205	1	5	25	5	32
2017-11-30	205	1	6	27	6	19
2017-12-04	205	1	2	8	2	8
2017-12-16	205	1	2	12	2	ND
2015-12-02	205	1	6	111	13	0
2016-02-10	205	1	10	91	10	0
2016-05-19	205	1	17	32	17	36
2016-06-03	205	1	6	23	13	27
2016-06-10	205	1	6	17	6	25
2016-06-13	205	1	0	0	0	0
2017-05-22	206	1	2	8	2	8
2015-10-09	206	1	7	63	7	0
2017-07-24	206	1	5	34	5	22
2017-12-18	206	1	3	12	3	9
2016-07-06	206	1	4	16	4	18
2017-12-20	207	1	1	9	1	7
2017-12-23	207	1	5	22	5	15
2017-07-05	207	1	0	7	1	ND
2017-11-20	207	1	1	6	1	5
2017-12-09	207	1	1	8	1	6
2017-08-02	208	1	1	7	1	12
2016-02-25	208	1	1	45	405	0
2016-05-19	208	1	3	10	3	16
2016-07-21	208	1	9	42	9	37
2016-12-21	208	1	9	21	10	32
2015-09-16	206	1	6	105	11	0
2017-11-27	209	1	1	8	1	7
2017-12-16	209	1	3	17	3	ND
2017-12-18	209	1	1	6	1	5
2017-12-19	209	1	4	19	4	15
2017-08-18	ND	1	10	63	10	48
2017-10-23	996	1	6	55	6	18
2016-10-11	211	1	6	14	6	30
2017-01-30	211	1	8	28	8	41
2017-04-17	211	1	5	20	0	13
2017-06-30	211	1	8	46	8	41
2017-07-11	211	1	3	7	3	5
2017-09-11	211	1	3	13	3	15
2017-09-12	211	1	5	42	7	22
2016-01-13	211	1	11	95	11	0
2016-01-21	211	1	1	11	1	0
2016-03-28	211	1	8	71	9	0
2016-06-07	211	1	7	20	7	28
2016-06-10	211	1	5	10	5	23
2015-07-21	211	1	2	106	12	0
2015-08-28	211	1	24	320	32	0
2017-03-09	212	1	1	5	1	6
2017-04-03	212	1	2	8	2	12
2017-11-03	212	1	3	17	3	10
2016-06-30	212	1	14	40	16	59
2016-07-04	212	1	3	10	3	8
2015-12-28	212	1	6	109	10	0
2017-10-14	997	1	1	8	1	2
2015-11-19	206	1	2	51	6	0
2017-11-21	ND	1	5	18	5	16
2017-03-25	213	1	3	4	3	16
2017-06-27	213	1	6	45	6	29
2017-08-08	213	1	6	34	6	30
2015-09-15	213	1	5	69	7	0
2015-06-25	323	1	6	117	42	0
2017-06-26	219	1	9	37	9	30
2016-08-27	214	0	3	10	3	16
2017-04-07	214	1	4	20	4	10
2017-06-09	214	1	1	5	1	4
2017-06-13	214	1	1	2	1	1
2017-08-23	214	1	5	36	5	29
2017-08-28	214	1	3	48	10	29
2017-10-24	214	1	3	23	3	21
2017-08-08	215	1	1	25	4	22
2017-11-27	215	1	6	20	6	20
2017-12-19	215	1	2	12	2	12
2016-06-06	215	1	2	8	9	24
2015-10-19	217	1	13	121	13	0
2015-10-08	217	1	8	79	8	0
2015-07-06	217	1	5	78	6	0
2017-06-27	217	1	4	24	4	30
2017-10-23	217	1	6	26	6	23
2017-10-24	217	1	1	6	1	7
2017-10-24	217	1	1	6	0	ND
2017-10-25	217	1	8	86	200	31
2017-10-27	217	1	13	85	200	56
2017-11-19	217	1	12	67	12	32
2017-11-20	217	1	1	5	1	ND
2017-12-12	217	1	8	45	8	18
2017-12-13	217	1	6	65	13	50
2017-12-14	217	1	4	20	4	19
2017-12-15	217	1	3	16	3	15
2017-12-20	217	1	8	46	8	37
2017-12-22	217	1	6	26	6	20
2016-04-22	217	1	3	26	3	0
2016-05-30	217	1	11	44	11	32
2016-06-03	217	1	0	5	0	0
2016-06-06	217	1	4	13	4	13
2016-06-13	217	1	1	12	5	19
2016-08-04	218	1	4	10	4	22
2015-07-13	218	1	3	38	3	0
2016-03-09	218	1	2	19	152	0
2016-07-12	218	1	7	12	7	13
2016-07-13	218	1	2	5	2	19
2016-07-26	218	1	3	14	3	10
2017-12-12	218	1	5	30	5	20
2017-12-19	218	1	4	23	4	18
2017-10-05	219	1	2	6	2	ND
2016-07-11	218	1	3	11	3	14
2016-07-15	218	1	7	15	7	22
2016-07-18	218	1	2	6	2	9
2015-07-27	999	1	0	113	11	0
2015-07-27	999	1	0	124	14	0
2015-07-27	999	1	2	21	2	0
2015-08-10	999	1	4	73	9	0
2015-08-11	999	1	6	81	11	0
2016-06-06	1001	1	2	4	2	7
2015-06-07	220	1	1	58	6	0
2015-10-16	220	1	8	69	8	0
2017-08-31	220	1	3	37	9	27
2017-11-14	220	1	3	13	3	1
2017-12-14	220	1	13	83	13	26
2016-01-21	220	1	1	50	6	0
2017-05-29	1002	1	2	21	3	18
2016-06-29	1002	1	3	14	3	16
2016-12-01	220	1	4	9	4	15
2016-07-29	311	1	11	19	11	24
2016-02-05	311	1	3	25	3	0
2016-04-07	311	1	2	16	2	0
2016-08-03	221	1	7	22	7	12
2016-10-18	221	1	5	10	5	20
2016-10-25	221	1	9	20	9	15
2016-11-05	221	1	4	10	4	15
2017-01-12	221	1	0	29	11	32
2017-04-13	221	1	4	25	4	24
2017-05-02	221	1	10	65	14	53
2017-05-12	221	1	7	33	7	28
2015-10-13	221	1	5	61	5	0
2017-06-30	221	1	8	26	8	21
2017-07-03	221	1	1	2	1	1
2017-07-20	221	1	5	41	5	46
2017-09-12	221	1	6	38	10	30
2017-10-02	221	1	10	65	10	42
2017-10-16	221	1	7	52	7	29
2017-10-26	221	1	10	64	300	30
2017-10-27	221	1	2	9	2	10
2017-10-30	221	1	7	36	7	27
2015-11-09	221	1	6	69	8	0
2017-11-19	221	1	5	20	5	ND
2017-11-27	221	1	5	21	5	20
2017-11-29	221	1	13	58	13	44
2017-12-15	221	1	8	100	8	26
2017-12-18	221	1	6	38	6	27
2015-11-27	221	1	7	94	10	0
2016-02-11	221	1	2	19	2	0
2015-07-23	221	1	3	40	5	0
2016-04-13	221	1	4	42	5	0
2016-04-14	221	1	4	38	4	0
2016-04-22	221	1	2	39	5	0
2016-06-06	221	1	2	9	2	8
2016-06-13	221	1	7	15	6	38
2016-06-14	221	1	13	25	13	44
2016-06-15	221	1	10	40	13	40
2016-06-20	221	1	5	22	5	25
2016-06-22	221	1	7	31	7	25
2016-06-28	221	1	5	22	6	7
2017-12-14	222	1	10	40	10	30
2017-12-16	222	1	8	23	8	ND
2016-12-19	225	1	1	3	1	3
2017-03-04	225	0	6	44	8	39
2016-11-21	223	1	10	16	10	34
2016-10-20	223	1	9	26	9	32
2017-05-08	223	1	8	44	8	18
2017-08-03	223	1	19	85	19	70
2017-08-22	223	1	12	84	12	34
2017-08-28	223	1	3	42	10	39
2016-08-03	224	1	8	20	8	32
2016-08-04	224	1	8	34	8	29
2016-08-15	224	0	6	14	6	0
2016-09-14	224	1	4	8	5	8
2016-09-20	224	1	6	23	6	28
2016-10-18	224	1	5	13	5	22
2016-11-04	224	1	13	28	15	54
2016-12-06	224	1	5	7	5	22
2016-12-09	224	1	1	2	0	0
2016-12-12	224	1	1	4	0	0
2015-09-18	224	1	10	109	12	0
2017-01-26	224	1	5	14	8	29
2017-05-15	224	1	3	30	7	25
2017-06-21	224	1	10	36	12	31
2015-07-06	224	1	4	54	5	0
2017-10-03	224	1	5	33	5	25
2017-10-16	224	1	7	39	7	23
2017-10-26	224	1	8	63	400	18
2017-11-01	224	1	5	17	5	9
2017-11-06	224	1	7	30	7	26
2017-11-27	224	1	9	41	9	27
2015-11-25	224	1	11	111	11	0
2016-02-15	224	1	2	21	2	0
2016-03-31	224	1	12	87	12	0
2016-04-13	224	1	3	39	5	0
2016-06-09	224	1	10	13	10	37
2016-10-06	225	1	5	16	6	28
2015-09-02	225	1	5	104	8	0
2016-10-18	225	1	12	54	12	35
2015-09-09	225	1	11	161	17	0
2016-11-07	225	1	3	5	3	9
2016-11-29	225	1	6	15	6	18
2015-09-16	225	1	9	117	13	0
2016-12-27	225	1	1	5	1	0
2017-01-10	225	1	8	18	8	42
2017-01-13	225	1	9	23	9	32
2017-01-16	225	1	2	5	2	9
2017-02-02	225	1	10	20	10	38
2015-09-24	225	1	10	125	13	0
2017-02-06	225	1	8	15	8	17
2017-03-02	225	1	7	43	7	38
2017-05-24	225	1	24	119	24	88
2017-05-26	225	1	11	72	11	25
2017-05-27	225	0	1	7	1	ND
2017-05-27	225	0	1	8	1	ND
2017-05-30	225	1	9	13	9	38
2017-06-02	225	1	8	39	10	33
2015-07-06	225	1	6	111	8	0
2017-08-07	225	1	11	70	11	54
2015-10-27	225	1	2	27	2	0
2017-09-15	225	1	7	42	7	22
2017-10-05	225	1	8	40	8	ND
2017-10-10	225	1	15	52	15	32
2017-10-14	225	1	18	114	18	25
2017-10-21	225	1	3	14	3	14
2017-10-24	225	1	7	49	7	32
2017-10-27	225	1	7	26	7	30
2017-10-30	225	1	11	62	11	49
2017-11-19	225	1	22	120	22	70
2017-11-21	225	1	3	12	3	7
2017-11-22	225	1	16	8	16	55
2017-12-04	225	1	7	34	7	22
2017-12-12	225	1	1	8	1	6
2017-12-13	225	1	8	122	26	100
2017-12-16	225	1	2	8	2	ND
2017-12-18	225	1	8	34	8	26
2017-12-20	225	1	8	38	8	27
2015-11-25	225	1	16	152	16	0
2015-12-15	225	1	7	70	7	0
2015-07-20	225	1	2	105	11	0
2016-02-15	225	1	6	80	6	0
2016-04-14	225	1	8	58	8	0
2016-05-20	225	1	13	22	13	0
2016-05-26	225	1	15	73	20	65
2016-05-30	225	1	8	35	8	24
2016-06-03	225	1	4	8	4	16
2016-06-06	225	1	25	25	25	64
2016-06-08	225	1	14	41	14	52
2016-06-09	225	1	4	10	4	19
2016-06-13	225	1	8	30	8	39
2016-06-15	225	1	6	19	6	16
2016-06-20	225	1	7	32	7	12
2016-06-22	225	1	15	59	15	53
2016-07-04	225	1	9	41	9	32
2016-07-11	225	1	10	43	10	23
2016-07-12	225	1	3	10	4	11
2016-01-21	225	1	1	97	10	0
2015-08-24	225	1	9	288	30	0
2016-11-22	ND	1	3	5	3	9
2017-11-04	ND	1	1	4	1	3
2016-06-06	ND	1	8	21	8	32
2017-04-10	228	1	5	43	7	19
2017-11-24	228	1	1	7	1	3
2017-10-21	227	1	3	20	3	19
2017-10-26	227	1	5	27	5	27
2016-02-09	227	1	1	9	106	0
2016-06-07	227	1	1	3	1	9
2015-09-21	227	1	5	66	7	0
2015-07-09	227	1	8	79	8	0
2016-02-19	227	1	4	42	4	0
2016-11-29	228	1	4	11	4	27
2016-07-01	228	1	1	5	1	8
2015-09-18	229	1	4	47	5	0
2017-12-04	229	1	10	39	10	22
2016-05-27	229	1	9	24	10	27
2016-11-09	1007	1	8	20	8	20
2016-11-18	1007	1	4	10	4	15
2016-11-21	1007	1	3	6	3	5
2017-10-16	1007	1	5	30	5	18
2017-10-18	1007	1	1	6	0	ND
2016-12-26	1008	1	3	13	3	12
2017-07-10	232	1	0	5	1	4
2017-07-27	232	1	1	5	1	3
2017-08-05	232	0	3	29	3	16
2017-09-25	232	1	1	4	1	4
2017-09-28	232	1	2	15	2	ND
2017-10-09	232	1	1	6	0	ND
2017-10-10	232	1	10	10	2	8
2017-10-19	232	1	2	12	2	6
2017-07-14	1010	1	64	355	64	191
2017-08-03	1010	1	6	36	6	30
2015-09-15	233	1	6	49	6	0
2016-05-19	233	1	4	12	4	10
2015-07-06	233	1	1	22	2	0
2016-05-19	233	1	3	11	5	14
2017-12-11	233	1	13	57	13	36
2016-10-11	ND	1	4	10	8	24
2015-07-13	234	1	13	125	13	0
2015-06-22	234	1	2	46	120	0
2015-12-15	1015	1	1	23	2	0
2017-12-05	1012	1	1	6	1	ND
2017-03-02	1013	1	4	28	4	25
2017-03-04	1014	0	5	23	5	24
2016-02-10	1014	1	3	49	6	0
2017-01-18	1015	1	3	14	3	25
2017-11-04	1015	1	14	55	14	50
2016-08-27	237	0	2	7	2	8
2015-09-15	237	1	8	104	10	0
2017-01-20	237	1	2	4	2	6
2015-09-30	237	1	0	83	8	0
2017-11-17	237	1	13	59	13	34
2017-11-18	237	1	1	0	1	ND
2016-05-20	1016	1	8	16	8	22
2017-06-09	1018	1	4	23	4	22
2017-06-13	1018	1	2	9	2	7
2017-10-04	ND	1	8	52	8	ND
2017-03-31	239	1	5	20	5	17
2016-07-29	241	1	3	8	3	12
2016-12-06	241	1	4	12	4	21
2017-02-14	241	1	0	11	7	12
2017-05-04	241	1	3	14	3	6
2015-10-07	241	1	10	100	10	0
2017-05-23	241	1	5	35	5	22
2017-05-27	241	0	5	22	5	ND
2017-05-29	241	1	7	40	7	35
2017-05-30	241	1	11	26	12	26
2015-10-14	241	1	6	115	11	0
2017-06-19	241	1	2	12	2	4
2015-10-19	241	1	13	190	19	0
2015-10-23	241	1	22	216	22	0
2017-07-19	241	1	6	29	6	20
2015-10-26	241	1	23	333	34	0
2017-07-31	241	1	14	109	14	41
2017-09-25	241	1	7	43	7	35
2017-10-18	241	1	4	29	4	14
2017-10-28	241	1	1	3	1	1
2017-11-19	241	1	5	33	5	ND
2017-11-20	241	1	13	84	13	49
2015-11-10	241	1	11	143	15	0
2017-12-14	241	1	12	54	12	26
2015-12-04	241	1	8	79	8	0
2016-07-01	241	1	8	26	8	27
2015-07-23	241	1	2	32	4	0
2016-06-28	ND	1	3	12	3	15
2015-08-28	ND	1	7	143	14	0
2015-07-09	ND	1	1	7	1	0
2015-06-29	ND	1	1	11	30	0
2015-06-30	ND	1	3	31	60	0
2015-11-14	ND	1	6	66	6	0
2016-07-11	ND	1	1	4	1	1
2016-11-16	245	1	4	5	4	14
2017-10-31	245	1	4	31	4	12
2016-08-04	245	1	5	28	5	10
2016-12-27	1022	1	3	9	3	0
2017-06-08	1022	1	3	25	3	16
2017-06-22	1022	1	2	16	2	11
2015-12-17	1022	1	1	58	4	0
2016-06-20	ND	1	30	6	3	16
2016-10-28	ND	1	2	6	2	10
2015-11-09	ND	1	3	48	5	0
2017-06-19	246	1	3	11	3	15
2015-11-19	246	1	3	71	7	0
2017-03-30	ND	1	6	33	8	26
2017-04-07	247	1	7	37	8	28
2017-04-10	247	1	2	16	2	14
2017-05-23	247	1	3	18	3	12
2017-06-27	247	1	2	11	2	3
2017-12-02	247	1	15	72	15	64
2016-07-05	247	1	5	16	5	20
2016-10-11	248	1	1	8	1	12
2017-12-09	248	1	7	25	7	14
2017-12-11	248	1	2	12	2	6
2017-07-16	ND	1	4	11	1	13
2016-06-24	249	1	2	4	2	3
2016-11-08	250	1	4	10	4	15
2017-01-25	250	1	5	9	5	15
2017-01-31	250	1	2	8	2	7
2017-08-30	250	1	5	52	5	29
2016-01-08	250	1	1	35	5	0
2016-02-19	250	1	3	40	4	0
2016-02-24	216	1	2	44	5	0
2017-11-10	251	1	6	33	6	20
2017-12-04	252	1	1	7	1	3
2017-12-07	252	1	2	0	2	5
2017-12-12	252	1	2	11	2	8
2016-03-09	253	1	3	28	3	0
2017-03-18	1029	1	1	7	0	0
2016-12-30	1032	1	7	26	9	18
2017-10-06	257	1	10	77	11	ND
2017-10-09	257	1	1	15	0	5
2017-10-11	257	1	8	58	8	52
2017-10-13	257	1	7	45	7	30
2016-12-01	248	1	2	9	2	9
2017-06-05	247	1	1	28	5	17
2015-10-09	248	1	5	47	5	0
2017-07-11	248	1	3	19	3	19
2015-07-06	255	1	3	40	3	0
2017-10-03	255	1	2	9	1	4
2017-10-28	255	1	9	60	9	40
2016-11-16	255	1	6	12	12	27
2016-06-16	255	1	2	22	2	10
2017-10-27	249	1	5	22	5	25
2015-12-17	249	1	4	58	6	0
2017-12-12	216	1	3	20	3	16
2017-11-16	256	1	5	33	5	16
2017-11-19	256	1	3	13	3	10
2016-08-03	253	1	2	7	2	8
2017-05-23	253	1	1	7	1	6
2017-03-24	1032	1	8	43	8	28
2017-08-14	1032	1	15	90	15	57
2015-06-17	1029	1	3	28	40	0
2016-02-29	216	1	2	25	4	0
2016-12-13	1036	1	6	19	6	0
2016-12-16	1036	1	0	2	2	0
2016-04-05	1041	1	3	66	3	0
2016-07-28	1040	1	5	16	5	23
2015-06-29	1040	1	1	22	20	0
2015-06-22	1040	1	1	22	90	0
2016-06-16	1040	1	7	23	7	21
2017-11-14	257	1	5	24	5	23
2017-05-12	258	1	1	5	1	2
2017-06-26	258	1	2	10	2	8
2017-07-31	258	1	3	10	3	5
2017-10-12	258	1	3	23	3	6
2017-11-17	258	1	6	39	6	31
2017-12-18	258	1	2	4	2	2
2016-06-15	258	1	8	24	8	27
2017-09-04	259	1	5	27	5	16
2016-03-30	259	1	3	28	3	0
2016-06-07	261	1	9	16	9	30
2017-09-04	261	1	7	33	7	26
2016-02-29	261	1	2	13	2	0
2016-06-20	263	1	6	18	6	35
2017-04-26	263	1	3	33	5	30
2016-04-13	263	1	1	13	2	0
2017-06-26	264	1	6	41	6	27
2017-04-02	1047	1	2	157	2	8
2017-07-06	264	1	10	82	10	52
2016-09-30	262	1	2	5	2	9
2016-10-06	262	1	8	20	8	44
2017-05-19	262	1	8	66	10	43
2015-11-09	262	1	6	105	11	0
2016-06-30	262	1	14	37	14	52
2016-07-05	262	1	2	5	2	10
2016-07-06	262	1	4	16	4	16
2017-04-03	ND	1	3	10	3	8
2017-11-03	ND	1	4	28	4	15
2017-08-17	1049	1	4	23	4	8
2015-06-17	1050	1	1	14	20	0
2017-02-02	265	1	0	2	1	2
2015-11-16	265	1	10	383	38	0
2017-08-02	265	1	0	2	1	1
2017-01-26	1052	1	3	8	3	13
2016-09-29	ND	1	1	6	0	1
2016-09-30	ND	1	6	12	12	27
2016-01-13	ND	1	5	48	5	0
2016-06-15	ND	1	5	14	5	17
2017-10-13	ND	1	7	36	7	41
2017-07-26	ND	1	7	31	7	29
2016-07-29	256	1	12	22	12	60
2016-08-04	256	1	1	2	1	6
2017-03-02	256	1	7	32	8	22
2017-11-27	256	1	7	32	7	25
2017-12-06	256	1	17	126	17	31
2015-11-17	256	1	1	118	14	0
2015-07-15	256	1	4	78	6	0
2016-02-10	256	1	10	94	10	0
2016-04-14	256	1	8	53	8	0
2016-06-06	256	1	3	10	3	10
2016-06-28	256	1	11	38	18	78
2016-09-20	1054	1	3	5	3	9
2017-02-18	1054	1	3	10	3	3
2015-09-11	1055	1	7	55	5	0
2015-09-11	268	1	4	59	5	0
2015-09-21	268	1	8	114	10	0
2017-08-28	268	1	8	83	15	51
2016-06-28	268	1	7	26	7	38
2016-07-04	268	1	6	21	6	23
2016-03-24	268	1	4	29	4	0
2015-01-20	ND	1	7	38	7	0
2015-01-19	ND	1	20	75	20	0
2015-12-03	ND	1	0	11	1	0
2016-03-09	ND	1	4	28	4	0
2016-12-16	305	1	3	18	3	20
2015-03-06	1022	1	15	74	19	56
2015-10-26	289	1	19	210	25	0
2016-07-07	1059	1	1	5	1	0
2016-10-28	1060	1	1	2	1	0
2017-07-10	270	1	5	42	5	28
2016-07-18	270	1	6	16	6	29
2016-04-05	227	1	1	11	1	0
2016-07-07	1063	1	3	16	3	13
2016-05-26	ND	1	4	18	4	14
2017-06-12	1065	1	3	20	3	19
2017-07-03	273	1	0	5	1	9
2017-07-05	273	1	38	169	38	67
2016-07-01	ND	1	8	20	9	26
2017-08-03	318	1	50	379	58	114
2017-09-27	318	1	1	7	1	6
2017-04-26	322	1	8	51	10	38
2015-11-16	ND	1	3	79	8	0
2017-05-10	274	1	2	15	3	8
2017-06-23	274	1	5	30	5	24
2017-08-21	274	1	20	121	20	82
2017-08-31	274	1	4	21	6	18
2017-08-14	274	1	9	62	9	45
2017-07-18	1066	1	1	7	0	ND
2017-03-24	275	1	4	38	7	31
2015-10-27	275	1	2	12	2	0
2015-06-17	275	1	3	26	20	0
2017-03-18	276	1	1	28	4	18
2016-09-29	276	1	2	9	3	14
2017-10-20	276	1	3	25	3	22
2016-02-23	276	1	3	39	3	0
2016-06-13	276	1	2	8	2	6
2017-09-04	1069	1	3	13	3	9
2016-02-23	263	1	6	80	8	0
2016-10-26	263	1	4	20	7	30
2017-06-12	263	1	8	84	8	62
2017-06-20	263	1	4	28	4	32
2017-09-27	263	1	6	24	6	25
2016-09-20	277	1	3	6	3	23
2017-01-16	277	1	2	4	2	11
2017-08-17	277	1	10	73	10	35
2017-10-11	277	1	2	13	2	15
2017-11-22	277	1	4	27	4	23
2016-07-11	277	1	2	6	2	4
2016-07-23	277	0	2	3	2	0
2016-07-18	272	1	3	6	3	7
2017-08-22	272	1	3	19	3	18
2017-08-30	272	1	5	28	5	20
2017-12-18	272	1	3	10	3	8
2015-10-16	279	1	11	113	11	0
2017-06-30	279	1	6	30	6	18
2017-09-04	279	1	4	35	7	32
2017-11-28	279	1	11	69	11	49
2017-08-08	280	1	1	21	3	19
2016-04-19	281	1	3	25	3	0
2016-05-26	281	1	4	3	5	13
2015-12-02	281	1	2	49	5	0
2017-05-26	280	1	2	13	2	10
2017-07-11	281	1	13	75	13	40
2017-07-12	281	1	9	49	9	38
2017-07-31	281	1	8	62	8	33
2017-02-22	282	1	2	2	2	5
2017-05-05	282	1	1	2	1	4
2017-05-12	282	1	1	2	1	1
2017-06-05	282	1	1	39	6	26
2016-04-27	ND	1	2	33	5	0
2017-06-05	283	1	17	128	17	46
2017-06-09	283	1	6	23	6	17
2017-06-28	283	1	6	39	6	37
2017-07-03	283	1	4	21	4	21
2017-07-05	283	1	0	8	0	ND
2017-07-06	283	1	1	6	0	ND
2017-07-10	283	1	5	25	4	28
2017-08-14	283	1	8	38	8	28
2017-09-06	283	1	1	71	9	42
2017-10-04	283	1	6	31	6	30
2017-11-28	283	1	7	37	7	32
2015-06-29	240	1	4	44	60	0
2015-06-26	240	1	7	81	7	0
2017-08-28	1072	1	5	41	5	30
2017-10-21	284	1	1	1	1	ND
2017-10-26	284	1	0	1	0	ND
2017-02-22	ND	1	6	8	6	27
2017-03-09	ND	1	1	3	2	7
2017-07-14	318	1	56	398	56	200
2017-07-16	318	1	1	7	7	ND
2016-06-27	286	1	3	10	3	14
2016-04-14	286	1	2	18	2	0
2017-10-19	285	1	4	17	4	7
2017-10-31	285	1	1	6	1	4
2017-11-02	285	1	3	10	3	7
2015-11-17	287	1	1	26	3	0
2015-11-23	287	1	1	10	1	0
2016-07-29	287	1	5	15	5	23
2016-08-09	287	1	2	3	2	3
2016-09-01	287	1	10	38	10	27
2016-10-21	287	1	5	10	5	20
2016-11-18	287	1	1	6	8	1
2016-11-21	287	1	7	13	7	21
2016-12-15	287	1	3	9	3	6
2017-01-18	287	1	11	20	11	41
2017-02-23	287	1	8	29	8	24
2015-09-30	287	1	10	239	24	0
2017-05-08	287	1	7	33	8	29
2017-05-19	287	1	10	66	10	34
2017-06-20	287	1	3	18	3	18
2017-07-07	287	1	5	19	5	ND
2017-07-26	287	1	10	118	19	73
2017-07-31	287	1	15	73	15	51
2017-08-16	287	1	12	60	12	57
2017-10-18	287	1	10	48	11	43
2017-10-26	287	1	6	25	200	24
2017-11-02	287	1	4	18	4	15
2017-11-03	287	1	7	21	7	20
2017-11-07	287	1	7	31	7	26
2017-11-09	287	1	5	34	5	30
2017-11-11	287	1	4	26	4	ND
2017-11-14	287	1	7	35	7	36
2017-11-20	287	1	4	17	4	15
2017-11-24	287	1	10	61	10	28
2017-11-28	287	1	7	32	7	18
2017-12-04	287	1	8	56	8	34
2017-12-11	287	1	4	18	4	16
2015-11-26	287	1	0	89	9	0
2015-12-10	287	1	4	47	5	0
2016-05-10	287	1	7	14	7	12
2016-05-19	287	1	12	32	14	46
2016-06-16	287	1	5	12	5	14
2016-06-21	287	1	0	30	5	23
2016-07-04	287	1	6	17	6	27
2016-07-21	287	1	5	12	5	3
2016-11-29	287	1	1	3	1	1
2016-12-17	287	0	6	19	6	24
2017-01-25	287	1	5	9	5	14
2017-02-06	287	1	10	23	12	44
2017-02-24	287	1	9	47	9	41
2017-05-03	287	1	7	14	7	33
2017-05-04	287	1	4	27	4	21
2017-11-20	287	1	9	49	9	37
2017-11-21	287	1	13	89	13	52
2016-12-19	287	1	3	8	3	7
2016-12-24	287	0	6	15	8	20
2016-12-29	287	1	7	11	5	17
2016-12-29	287	1	8	25	10	54
2015-09-22	287	1	10	176	18	0
2015-10-23	287	1	18	157	18	0
2015-10-27	287	1	19	134	15	0
2015-10-27	287	1	15	213	21	0
2016-03-24	287	1	43	47	456	0
2016-04-01	287	1	7	80	10	0
2015-09-16	287	1	3	33	3	0
2015-12-15	287	1	10	140	14	0
2016-04-14	1088	1	1	32	4	0
2017-03-25	288	1	3	6	3	8
2017-09-14	288	1	1	4	1	3
2017-10-02	288	1	3	15	3	9
2017-10-03	288	1	6	33	6	3
2017-10-14	288	1	7	45	7	ND
2017-10-14	288	1	9	58	9	10
2015-11-16	288	1	4	68	8	0
2016-08-04	289	1	9	21	9	47
2016-09-23	289	1	1	3	1	2
2016-11-16	289	1	2	5	2	9
2016-11-21	289	1	7	12	7	29
2017-02-10	289	1	14	30	14	36
2015-10-07	289	1	11	107	11	0
2015-10-14	289	1	7	61	8	0
2017-07-11	289	1	3	7	3	5
2017-08-02	289	1	1	80	14	62
2017-10-06	289	1	10	52	13	ND
2017-10-14	289	1	7	45	7	7
2017-11-06	289	1	10	50	10	36
2017-12-15	289	1	3	14	3	13
2015-11-19	289	1	1	15	1	0
2015-12-10	289	1	22	212	22	0
2015-12-29	289	1	16	209	23	0
2016-01-07	289	1	16	153	16	0
2016-03-28	289	1	1	30	4	0
2016-05-25	289	1	7	15	7	18
2016-06-16	289	1	3	4	3	2
2016-07-04	289	1	5	14	5	17
2016-07-07	289	1	12	24	12	31
2016-10-28	290	1	0	2	2	9
2017-11-29	291	1	3	20	3	17
2017-10-19	292	1	3	18	3	14
2015-07-21	287	1	2	66	7	0
2015-08-10	241	1	14	195	20	0
2015-08-10	287	1	5	71	9	0
2015-10-12	287	1	3	50	5	0
2016-06-20	287	1	3	30	5	23
2017-10-28	294	1	3	23	3	12
2016-06-27	293	1	1	6	1	8
2017-05-18	294	1	9	23	9	28
2017-09-27	1076	1	1	2	1	2
2016-04-13	1076	1	2	23	3	0
2016-06-15	1076	1	8	17	8	29
2016-07-11	1078	1	5	10	5	13
2016-02-15	1078	1	4	31	4	0
2015-10-05	1079	1	7	60	7	0
2017-04-26	1081	1	7	34	7	16
2017-07-20	1081	1	9	32	9	46
2017-10-02	1080	1	6	22	6	15
2017-10-31	299	1	5	25	5	12
2017-11-18	299	1	3	17	3	ND
2015-10-05	1082	1	2	16	2	0
2016-08-25	296	1	2	4	2	4
2016-09-29	296	1	5	8	5	15
2016-10-25	296	1	2	6	2	14
2016-12-02	296	1	7	17	8	15
2016-12-09	296	1	7	11	7	18
2016-12-21	296	1	4	9	4	19
2015-09-30	296	1	0	35	3	0
2015-10-05	296	1	10	132	14	0
2017-05-19	296	1	9	43	9	37
2017-05-22	296	1	3	11	3	12
2017-05-24	296	1	2	12	2	13
2017-07-03	296	1	2	7	2	3
2017-07-11	296	1	6	28	6	20
2017-11-20	296	1	4	15	4	13
2017-12-12	296	1	1	4	1	3
2017-12-15	296	1	4	21	4	16
2015-11-27	296	1	3	29	3	0
2016-03-30	296	1	1	18	2	0
2016-05-20	296	1	7	8	7	0
2016-05-23	296	1	4	10	4	33
2016-06-07	296	1	10	12	10	46
2016-06-08	296	1	2	3	2	6
2016-06-10	296	1	4	12	4	21
2016-06-14	296	1	11	27	11	41
2016-06-27	296	1	2	3	2	8
2016-10-21	297	1	4	7	4	17
2016-10-25	297	1	4	7	4	4
2015-11-10	297	1	5	56	7	0
2016-05-27	297	1	14	43	15	55
2016-06-06	297	1	37	95	36	110
2016-06-09	297	1	7	12	7	39
2016-07-01	297	1	4	58	4	15
2016-12-22	1083	1	5	22	5	30
2016-06-10	1083	1	6	14	6	21
2017-09-27	1084	1	3	12	3	14
2015-10-27	300	1	4	39	6	0
2016-06-06	300	1	3	9	3	11
2017-09-22	300	1	4	8	4	7
2016-06-09	300	1	7	11	7	20
2015-10-27	1086	1	5	41	5	0
2017-10-09	1087	1	1	7	1	7
2017-07-07	1088	1	8	38	8	ND
2017-12-23	1088	1	6	30	6	9
2017-06-06	1089	1	8	23	8	12
2017-01-13	1089	1	10	12	10	18
2016-06-03	1092	1	11	25	11	46
2016-06-13	ND	1	2	12	2	15
2016-08-03	301	1	6	19	6	19
2017-08-24	302	1	1	17	7	14
2016-06-09	302	1	14	22	15	49
2015-10-05	302	1	3	48	6	0
2016-12-28	302	1	9	16	9	23
2017-09-25	1097	1	12	73	12	41
2016-08-15	303	0	4	10	4	0
2016-10-06	303	1	6	13	6	18
2015-12-09	303	1	2	45	5	0
2016-04-07	303	1	4	29	4	0
2015-07-23	303	1	3	81	8	0
2017-05-22	303	1	5	24	5	24
2017-05-26	303	1	2	9	2	5
2017-06-06	303	1	3	13	3	6
2017-07-10	303	1	3	17	3	14
2017-07-21	303	1	6	60	10	54
2017-08-22	303	1	11	56	11	39
2016-06-08	303	1	5	17	5	18
2017-10-09	303	1	6	50	6	27
2017-10-21	303	1	3	20	3	18
2017-10-24	303	1	7	39	7	13
2017-11-20	303	1	9	71	9	32
2017-11-30	303	1	2	10	2	8
2017-12-11	303	1	3	26	5	25
2017-12-18	303	1	3	13	3	10
2017-12-19	303	1	1	4	0	ND
2017-12-29	303	1	5	6	5	3
2016-05-26	303	1	4	10	4	18
2016-05-30	303	1	13	36	13	46
2016-12-12	304	1	1	3	1	4
2017-06-30	304	1	2	15	2	ND
2017-12-02	304	1	3	14	3	7
2017-12-16	304	1	5	31	5	ND
2016-02-05	304	1	8	81	8	0
2016-04-22	304	1	0	6	1	0
2015-02-03	304	1	0	186	0	0
2016-04-13	304	1	3	37	5	0
2016-08-03	305	1	4	19	4	16
2017-03-14	305	1	3	18	3	17
2017-07-21	305	1	1	3	1	2
2017-12-11	305	1	8	39	8	32
2017-12-23	305	1	5	28	5	10
2015-12-09	305	1	7	90	9	0
2016-03-31	305	1	9	74	9	0
2016-07-21	305	1	4	11	4	10
2016-07-23	305	0	7	21	8	0
2016-10-11	309	1	3	20	8	13
2016-10-13	309	1	7	7	7	26
2016-10-26	309	1	5	12	5	19
2017-06-14	309	1	5	24	5	22
2017-06-16	309	1	4	24	4	18
2017-06-20	309	1	4	29	4	21
2017-07-12	309	1	5	27	5	25
2017-07-17	309	1	6	36	6	21
2017-10-23	309	1	1	6	1	ND
2016-02-12	309	1	4	42	4	0
2016-06-24	309	1	4	25	5	21
2016-12-03	307	0	3	5	3	7
2016-10-13	307	1	10	27	10	38
2017-01-06	307	1	5	10	5	0
2017-01-20	307	1	8	39	15	44
2017-06-14	307	1	4	16	4	15
2016-06-14	307	1	18	38	18	66
2016-06-17	307	1	4	13	4	24
2016-07-15	307	1	4	7	4	1
2016-10-17	307	1	2	4	2	8
2016-12-30	307	1	3	13	3	12
2017-05-22	307	1	5	25	5	28
2017-07-17	307	1	6	46	6	18
2017-08-23	307	1	8	33	8	28
2017-10-19	307	1	6	43	6	37
2016-06-27	307	1	8	12	8	31
2016-06-29	308	1	4	20	4	15
2016-06-30	308	1	0	2	0	0
2016-07-06	308	1	7	22	7	22
2016-07-08	308	1	5	17	5	5
2017-10-16	ND	1	7	50	7	33
2015-07-21	ND	1	1	10	1	0
2017-06-06	1100	1	6	25	6	20
2015-07-10	1100	1	12	117	12	0
2015-06-17	ND	1	2	14	20	0
2015-06-30	ND	1	1	21	60	0
2017-04-07	311	1	5	20	5	14
2017-08-25	311	1	1	66	14	38
2017-11-22	311	1	3	21	3	13
2016-08-01	ND	1	1	8	4	6
2015-09-09	289	1	9	115	15	0
2015-06-30	289	1	5	56	180	0
2015-09-04	313	1	7	80	10	0
2016-12-01	313	1	3	11	3	11
2017-10-12	313	1	15	90	15	36
2017-10-13	313	1	10	50	10	24
2017-10-14	313	1	3	25	3	14
2016-04-07	313	1	3	21	3	0
2017-09-15	314	1	5	25	5	17
2017-07-05	315	1	49	288	49	102
2017-07-20	315	1	1	6	0	ND
2017-07-21	315	1	1	5	1	ND
2017-12-01	315	1	1	9	1	9
2017-12-07	315	1	2	7	2	23
2015-07-13	ND	1	1	48	5	0
2016-11-08	316	1	1	6	1	1
2016-11-09	316	1	7	13	7	27
2015-09-15	316	1	7	107	11	0
2015-09-24	316	1	1	27	3	0
2017-12-12	316	1	5	31	5	17
2015-07-21	316	1	2	68	4	0
2016-02-23	316	1	3	51	4	0
2016-05-30	316	1	4	9	4	13
2016-06-13	316	1	6	20	7	32
2016-07-07	316	1	3	12	3	12
2016-07-08	316	1	1	2	1	3
2017-11-20	317	1	7	40	7	13
2016-03-03	ND	1	18	188	1068	0
2015-01-26	ND	1	8	34	8	0
2016-06-20	ND	1	6	13	6	0
2017-10-18	1103	1	5	26	5	23
2017-11-28	1103	1	6	31	6	29
2016-02-29	1103	1	2	16	302	0
2017-08-07	319	1	5	24	5	20
2017-12-01	319	1	7	40	7	26
2017-12-12	319	1	4	25	4	26
2015-07-20	319	1	1	51	4	0
2016-04-27	319	1	2	13	2	0
2016-05-27	319	1	2	5	2	8
2016-05-30	319	1	1	8	2	15
2016-06-13	319	1	3	6	3	7
2015-02-02	321	1	39	166	39	345
2016-09-14	321	1	3	10	6	0
2016-09-29	321	1	8	65	14	45
2016-09-30	321	1	5	10	8	31
2016-10-13	321	1	7	24	7	27
2016-11-07	321	1	7	16	7	12
2016-11-09	321	1	6	19	6	17
2015-09-11	321	1	1	22	2	0
2016-11-29	321	1	5	10	5	18
2017-01-26	321	1	3	6	3	8
2015-10-05	321	1	11	109	11	0
2017-04-17	321	1	6	18	6	12
2017-04-27	321	1	6	27	6	18
2017-05-02	321	1	6	33	7	31
2017-05-11	321	1	14	65	14	39
2017-05-13	321	0	14	78	14	ND
2017-05-14	321	0	1	9	0	ND
2017-06-21	321	1	6	38	6	20
2017-07-25	321	1	18	108	18	67
2017-09-11	321	1	4	19	4	16
2017-10-10	321	1	6	23	6	12
2017-10-14	321	1	8	70	8	27
2017-10-18	321	1	5	63	10	53
2017-10-27	321	1	34	180	500	85
2015-11-09	321	1	7	98	11	0
2017-10-31	321	1	2	11	2	9
2017-11-02	321	1	2	12	2	12
2017-11-09	321	1	4	14	4	8
2017-11-24	321	1	7	28	7	28
2017-11-27	321	1	1	4	1	ND
2017-12-01	321	1	4	24	4	12
2016-01-13	321	1	6	46	6	0
2016-02-25	321	1	7	66	107	0
2016-03-24	321	1	8	59	8	0
2016-04-01	321	1	5	39	9	0
2016-05-27	321	1	16	47	17	50
2016-06-02	321	1	14	26	17	51
2016-06-08	321	1	9	24	9	47
2016-06-09	321	1	1	1	0	1
2016-06-10	321	1	8	14	8	25
2016-07-15	321	1	5	16	5	32
2015-06-07	323	1	1	47	5	0
2017-07-25	323	1	7	34	7	18
2015-11-11	323	1	5	74	9	0
2016-09-23	322	1	5	10	5	21
2015-11-25	324	1	8	74	8	0
2017-05-08	324	1	5	35	5	11
2017-06-19	324	1	4	41	7	28
2016-06-06	324	1	7	18	7	38
2015-02-11	324	1	32	112	32	266
2015-09-09	324	1	8	105	11	0
2017-09-25	324	1	3	23	3	24
2017-11-14	324	1	1	2	1	1
2017-11-16	324	1	8	41	8	21
2017-12-15	324	1	5	21	5	10
2016-08-09	324	1	3	10	3	16
2017-07-20	195	1	1	6	0	ND
2017-11-20	195	1	1	6	1	5
2017-12-12	195	1	1	4	1	4
2017-12-18	195	1	2	13	2	10
2016-03-30	ND	1	5	67	7	0
2017-02-03	325	0	1	31	10	ND
2017-10-02	325	0	1	43	8	0
2017-05-05	325	0	2	22	6	ND
2017-07-09	325	0	3	46	16	0
2017-10-23	ND	0	2	32	8	32
2016-11-02	ND	1	7	28	7	36
2017-02-08	364	0	2	43	9	ND
2017-06-16	389	1	4	37	12	0
2016-05-14	389	1	3	9	3	0
2017-10-12	328	0	4	53	10	36
2017-10-13	328	1	4	72	14	22
2017-07-28	328	0	2	38	12	0
2017-03-11	375	0	1	51	11	ND
2017-06-01	389	1	6	76	15	40
2015-07-22	ND	1	6	140	13	0
2016-11-29	329	1	0	5	3	4
2017-11-27	329	0	0	76	0	ND
2016-08-20	330	1	9	69	18	67
2016-08-19	330	0	0	0	0	ND
2016-08-19	330	0	0	0	0	ND
2016-03-29	ND	1	0	25	4	0
2017-07-10	331	1	3	61	10	30
2017-11-20	329	1	3	43	10	23
2017-06-11	329	0	4	100	20	0
2017-04-05	332	1	2	31	8	14
2017-05-22	332	1	7	117	13	18
2017-06-17	332	0	5	62	13	0
2017-07-06	332	1	0	78	10	0
2016-05-16	332	1	4	18	4	14
2017-02-10	333	0	1	29	10	ND
2017-02-24	333	0	1	27	10	ND
2017-04-04	333	1	1	63	13	14
2017-02-10	333	0	0	0	0	ND
2017-02-23	333	0	1	11	3	ND
2016-12-21	333	0	0	0	0	ND
2016-01-01	333	1	5	55	5	0
2017-09-06	333	0	4	33	5	5
2017-10-23	333	0	2	48	15	48
2017-11-07	333	1	3	38	9	38
2017-03-20	ND	0	4	30	5	0
2017-03-20	ND	0	4	30	5	ND
2017-01-10	ND	0	9	54	9	ND
2017-01-10	ND	0	9	65	9	54
2017-11-17	ND	0	1	21	1	0
2017-08-21	335	0	3	47	9	0
2017-09-18	335	0	4	86	12	ND
2017-11-20	335	1	2	21	7	9
2017-02-10	335	0	1	32	6	ND
2017-04-07	335	1	3	53	10	27
2017-06-26	335	1	3	43	0	23
2017-02-10	335	0	0	0	0	ND
2016-11-16	335	0	1	26	9	ND
2016-08-05	336	1	1	2	1	4
2016-05-02	1111	1	6	48	1806	0
2016-05-02	1111	1	6	36	6	19
2017-07-24	ND	1	3	22	5	22
2017-05-11	337	0	2	76	10	ND
2017-11-20	ND	1	4	61	0	11
2015-06-23	1113	1	16	410	40	0
2016-12-12	1113	0	1	10	8	ND
2016-08-03	352	1	3	16	3	15
2015-12-28	ND	1	13	84	13	0
2015-07-31	1116	1	10	117	13	0
2017-07-07	1117	0	2	43	11	0
2017-02-15	1118	0	3	67	13	ND
2017-03-25	1118	0	4	84	11	ND
2017-06-11	1118	0	6	100	24	0
2015-07-28	1118	1	1	99	11	0
2017-04-08	328	0	2	7	6	ND
2017-01-04	1118	0	1	8	2	ND
2017-03-29	340	0	4	32	11	ND
2017-02-08	340	0	2	31	10	ND
2017-02-01	341	0	1	37	10	ND
2017-05-15	341	0	6	77	10	ND
2016-11-11	341	0	1	43	8	ND
2016-11-17	341	0	1	58	12	ND
2016-11-17	341	0	0	0	0	ND
2016-11-10	341	1	6	36	20	0
2016-05-03	341	1	12	23	12	42
2016-05-04	341	1	4	12	4	7
2017-11-17	341	0	0	19	0	0
2016-05-03	341	1	12	83	12	0
2016-05-04	341	1	5	57	308	0
2017-11-01	342	1	2	69	13	10
2016-05-05	342	1	23	181	23	0
2016-05-05	342	1	23	66	23	87
2015-12-28	344	1	3	49	5	0
2016-10-12	346	0	5	21	1	ND
2017-04-22	346	0	5	35	12	ND
2017-09-14	347	0	6	98	11	0
2017-05-24	347	1	7	50	2	13
2017-06-06	347	1	3	71	15	54
2015-10-03	ND	1	10	95	10	0
2016-03-21	ND	1	45	368	45	0
2015-10-19	ND	1	8	97	11	0
2017-06-08	1123	1	8	94	24	37
2017-06-12	1123	0	5	28	9	0
2017-05-06	350	0	2	77	11	ND
2016-05-04	367	1	4	32	4	0
2016-05-04	367	1	5	17	8	33
2016-11-08	1125	1	4	7	4	4
2017-01-30	352	0	3	29	7	ND
2017-07-31	352	0	4	49	10	ND
2015-12-28	352	1	5	52	5	0
2017-04-17	352	1	2	33	9	23
2017-05-17	352	0	18	185	11	ND
2017-05-19	352	1	3	71	13	26
2017-06-15	352	1	6	52	14	48
2017-12-05	352	0	0	29	0	0
2017-09-12	325	0	1	23	5	11
2017-09-12	325	0	1	9	1	10
2017-04-25	355	1	10	69	15	58
2017-04-26	355	1	2	25	6	15
2016-07-14	ND	1	7	35	7	11
2017-01-26	1130	0	2	24	0	0
2017-07-11	1130	1	3	57	11	30
2016-12-07	357	0	2	34	4	ND
2017-05-08	1130	0	10	70	9	ND
2016-07-20	1133	1	9	24	9	26
2017-11-30	ND	1	3	27	5	13
2017-07-28	160	0	7	105	28	0
2017-11-07	ND	0	3	41	10	32
2017-11-20	ND	1	6	54	0	24
2017-02-08	ND	0	2	36	10	ND
2017-02-13	ND	0	1	31	2	ND
2017-05-29	ND	1	4	17	17	0
2017-01-23	ND	0	2	20	6	ND
2017-02-09	ND	0	0	0	0	ND
2017-02-09	ND	0	4	20	4	ND
2016-10-12	ND	0	5	21	1	ND
2015-07-28	ND	1	3	145	14	0
2016-12-07	ND	0	0	0	0	ND
2017-01-20	ND	0	3	34	15	ND
2016-12-24	ND	0	2	24	7	ND
2017-01-04	333	0	1	13	7	ND
2017-05-09	335	0	6	174	25	ND
2017-05-16	ND	1	5	67	13	8
2017-10-23	336	1	1	31	13	26
2017-03-08	ND	0	1	53	13	ND
2017-03-08	ND	0	1	53	13	0
2017-02-09	ND	0	1	24	6	ND
2016-10-27	ND	0	1	27	1	ND
2017-02-20	ND	0	2	51	10	ND
2017-04-08	ND	0	2	16	9	ND
2016-08-03	363	1	6	10	6	18
2016-01-01	363	1	6	60	6	0
2017-10-20	363	0	4	54	11	16
2017-11-02	363	1	3	39	8	34
2017-12-10	363	1	1	13	1	0
2017-02-25	363	0	2	9	5	ND
2017-03-04	363	0	1	69	9	ND
2017-03-25	363	0	2	75	10	ND
2017-04-01	363	0	1	33	6	ND
2017-04-21	363	1	2	69	15	27
2017-05-15	363	0	3	96	13	ND
2017-05-16	363	1	5	77	15	31
2017-05-20	363	0	22	86	22	ND
2017-05-27	363	0	2	55	13	ND
2017-02-24	363	0	1	3	1	ND
2017-04-01	363	0	0	8	0	ND
2017-03-05	363	0	5	32	7	0
2017-03-05	363	0	5	32	7	ND
2016-10-07	364	0	2	3	2	8
2016-11-08	365	1	2	6	2	14
2016-11-12	365	0	2	3	2	8
2017-02-21	367	0	6	28	6	ND
2015-12-23	367	1	3	26	3	0
2016-12-14	363	0	1	6	2	ND
2016-12-22	363	0	0	0	0	ND
2016-12-22	363	0	3	12	3	ND
2016-11-10	363	0	1	34	7	ND
2016-11-15	363	0	1	41	10	ND
2017-03-04	363	0	5	32	7	0
2017-03-04	363	0	5	32	7	ND
2017-09-29	ND	0	1	32	10	42
2015-11-08	365	0	22	245	23	0
2015-04-29	364	1	0	148	328	0
2016-08-19	330	0	0	0	0	ND
2016-08-19	330	0	0	0	0	ND
2016-12-16	370	0	3	32	7	ND
2017-10-30	370	1	7	100	25	31
2017-10-30	370	1	8	62	22	17
2017-11-02	370	1	2	41	10	21
2017-11-17	370	0	3	52	18	25
2017-11-20	370	1	3	27	6	6
2017-11-20	370	0	1	3	2	6
2017-05-12	370	0	3	71	16	ND
2017-07-10	370	1	3	69	15	56
2016-10-07	370	0	3	11	3	15
2016-05-09	370	1	9	71	10	0
2016-05-09	370	1	9	21	10	27
2016-07-20	370	1	3	6	3	13
2016-10-07	371	0	5	10	8	31
2017-03-15	371	0	3	57	12	ND
[truncated: 1,888 more rows]

## Sheet: Outbreaks
Outbreak_ID	Start_date	End_date	Start	End	Semester	Outbreak_end	Loc_ID	Densite_pop	Time2cities	PluieMoy	IncR_2010_14	CV_2010_14	PreviousCATIyear	Previous_Inc	Cas_J3	Cultures_pos_J3	Cas_J4_	Duration	CATIc7_Nb	CATIc7_01	CATIc7_delai	CATIc7_delaiC	CATIc7_Cas	CATIc7_CasC	CATIc7_week	CATIc7_weekC	CATIc7_ATB
1	2017-04-22	2017-04-22	843	843	5	1	103	2.96	26	21.78	0.0412294	0	0	3.46793	2	0	0	1	2	1	2	B	1	A	1.75	A	0
2	2016-06-19	2016-06-20	536	537	3	1	105	3.8	55.5	40.65	0.0412294	0	0	0	2	0	0	2	0	0	NA	NA	0	0	0	0	NA
3	2017-10-09	2017-10-09	1013	1013	6	1	106	2.58	14.5	27.12	0.0412294	0	2.88538	5.77075	2	0	0	1	0	0	NA	NA	0	0	0	0	NA
4	2017-11-09	2017-11-09	1044	1044	6	1	106	2.58	14.5	9.78	0.0412294	0	2.79962	6.29914	2	0	0	1	0	0	NA	NA	0	0	0	0	NA
5	2016-04-09	2016-04-11	465	467	3	1	106	2.58	14.5	14.52	0.0412294	0	0	3.93319	2	0	0	3	0	0	NA	NA	0	0	0	0	NA
6	2017-08-09	2017-08-15	952	958	6	1	106	2.58	14.5	11.8543	0.0412294	0	0.767613	4.22187	3	0	2	7	0	0	NA	NA	0	0	0	0	NA
7	2016-03-18	2016-03-21	443	446	3	1	109	0.6	18.4	0	0.0412294	0	0.825792	0	10	0	3	4	2	1	3	C	0.153846	D	1.27273	A	0
8	2015-12-11	2015-12-24	345	358	2	1	11	5	53.75	4.77429	0.0994897	0	0	8.48837	2	0	3	14	2	1	15	D	0.4	C	0.666667	B	0
9	2016-05-27	2016-05-28	513	514	3	1	111	3.2	18.6	16.8	0.0412294	0	0	0	2	0	0	2	0	0	NA	NA	0	0	0	0	NA
10	2015-04-24	2015-04-24	114	114	1	1	1116	3.48	44	0	0.0261474	0	0	0	8	0	0	1	0	0	NA	NA	0	0	0	0	NA
11	2016-05-27	2016-05-31	513	517	3	1	1118	14.77	30.4	23.34	0.125804	0.863449	0.712891	0	3	0	3	5	0	0	NA	NA	0	0	0	0	NA
12	2016-06-17	2016-08-12	534	590	3	1	115	5.04	43.1667	13.2995	0.0412294	0	0	0.684803	2	0	8	57	0	0	NA	NA	0	0	0	0	NA
13	2017-11-08	2017-11-08	1043	1043	6	1	117	15.32	0.75	13.68	0.354621	0.91321	10.1583	8.7572	2	0	0	1	0	0	NA	NA	0	0	0	0	NA
14	2017-05-06	2017-08-23	857	966	5	1	117	15.32	0.75	12.2351	0.354621	0.91321	2.13201	2.13201	2	0	17	110	24	1	24	D	1.26316	A	1.4359	A	0.541667
15	2016-04-26	2016-06-26	482	543	3	1	118	2.85	28	16.8102	0.0412294	0	0	0	2	0	4	62	0	0	NA	NA	0	0	0	0	NA
16	2016-05-28	2016-05-30	514	516	3	1	121	3.43	21	29.01	0.0412294	0	0	0	2	0	0	3	1	1	4	C	0.5	B	0.7	B	1
17	2017-03-15	2017-03-16	805	806	5	1	124	3.26	6.4	21.42	0.0412294	0	0	0.90796	2	0	0	2	1	1	1	A	0.5	B	0.777778	B	0
18	2017-05-15	2017-05-15	866	866	5	1	125	3.92	29	0	0.0412294	0	0	0.421965	2	0	0	1	1	1	2	B	0.5	B	0.875	B	0
19	2015-10-19	2015-10-21	292	294	2	1	131	0.56	44.4	7.04	0.116711	0.940655	0	0	9	5	0	3	1	1	2	B	0.111111	D	0.7	B	0
20	2015-10-20	2015-10-20	293	293	2	1	136	0.7	41.75	2.04	0.116711	0.940655	0	0	2	0	0	1	1	1	1	A	0.5	B	0.875	B	0
21	2015-10-20	2015-10-20	293	293	2	1	138	0.54	48.25	2.04	0.116711	0.940655	0	0	2	0	0	1	0	0	NA	NA	0	0	0	0	NA
22	2017-02-17	2017-04-03	779	824	5	1	14	0.6	47.25	2.77761	0.0994897	0	0	6.09897	3	0	4	46	3	1	0	A	0.428571	C	0.396226	C	0
23	2017-04-15	2017-05-01	836	852	5	1	145	1.7	117.75	31.0324	0.139072	0	0.437126	5.68263	2	0	1	17	0	0	NA	NA	0	0	0	0	NA
24	2016-05-19	2016-05-26	505	512	3	1	147	3.04	59.25	20.2125	0.139072	0	1.44841	0.724206	8	0	1	8	2	1	1	A	0.222222	D	0.933333	B	1
25	2017-10-13	2017-11-08	1017	1043	6	1	150	2.42	49.75	4.16111	0.139072	0	4.67028	10.0591	2	0	2	27	1	1	4	C	0.25	C	0.205882	D	1
26	2015-02-04	2015-02-04	35	35	1	1	150	2.42	49.75	0	0.139072	0	0	21.4706	2	0	0	1	0	0	NA	NA	0	0	0	0	NA
27	2016-06-03	2016-06-28	520	545	3	1	150	2.42	49.75	10.1677	0.139072	0	2.10983	7.73603	2	0	3	26	1	1	8	D	0.2	D	0.212121	D	1
28	2017-03-07	2017-03-07	797	797	5	1	150	2.42	49.75	0	0.139072	0	3.2098	10.5465	2	0	0	1	3	1	1	A	1.5	A	2.625	A	1
29	2015-04-18	2015-04-21	108	111	1	1	151	1.4	53.4	2.085	0.139072	0	0	13.6449	3	0	1	4	0	0	NA	NA	0	0	0	0	NA
30	2016-04-14	2016-05-25	470	511	3	1	151	1.4	53.4	14.4079	0.139072	0	3.89126	11.6738	2	0	5	42	2	1	1	A	0.285714	C	0.285714	C	0
31	2017-02-13	2017-05-22	775	873	5	1	151	1.4	53.4	9.98788	0.139072	0	4.24419	12.261	2	0	16	99	10	1	2	B	0.555556	B	0.660377	B	1
32	2017-08-16	2017-08-25	959	968	6	1	1543	2.3	47	6.315	0.0261474	0	0	0	2	0	1	10	1	1	10	D	0.333333	C	0.411765	C	1
33	2016-06-18	2016-06-20	535	537	3	1	16	2.22	47.75	5.37	0.0994897	0	0	3.4176	2	0	0	3	0	0	NA	NA	0	0	0	0	NA
34	2016-06-18	2016-06-22	535	539	3	1	160	1	70.2	16.02	0.139072	0	0	0.683521	2	0	1	5	1	1	5	C	0.333333	C	0.583333	B	1
35	2016-01-02	2016-01-02	367	367	3	1	163	1.5	75.6	0	0.139072	0	0	0	3	0	0	1	1	1	4	C	0.333333	C	0.875	B	0
36	2016-04-06	2016-04-11	462	467	3	1	165	1.57	54.75	2.435	0.139072	0	1.58351	3.16703	3	0	1	6	2	1	6	C	0.5	B	1.07692	A	0
37	2016-06-26	2016-07-01	543	548	3	1	168	2.73	93.75	20.95	0.139072	0	0.673432	0.673432	2	0	2	6	0	0	NA	NA	0	0	0	0	NA
38	2016-05-19	2016-06-12	505	529	3	1	172	3.56	57.8	24.1296	0.139072	0	0	2.17262	15	0	15	25	1	1	1	A	0.0333333	D	0.21875	D	1
39	2017-06-25	2017-06-25	907	907	5	1	172	3.56	57.8	2.04	0.139072	0	0.80574	13.2947	2	0	0	1	1	1	3	C	0.5	B	0.875	B	1
40	2015-01-31	2015-03-11	31	70	1	1	173	1.5	69	0.44625	0.139072	0	0	0	3	0	4	40	0	0	NA	NA	0	0	0	0	NA
41	2015-01-26	2015-02-03	26	34	1	1	175	2.04	51.2	0.953333	0.139072	0	0	14.6	2	0	1	9	0	0	NA	NA	0	0	0	0	NA
42	2015-03-08	2015-03-11	67	70	1	1	175	2.04	51.2	0	0.139072	0	0	33.1818	3	0	1	4	0	0	NA	NA	0	0	0	0	NA
43	2016-06-09	2016-06-24	526	541	3	1	178	0.38	84.8	10.6425	0.139072	0	0	1.39048	3	1	2	16	1	1	10	D	0.2	D	0.304348	C	1
44	2017-06-03	2017-06-03	885	885	5	1	181	1.04	70.25	25.98	0.139072	0	0.825792	1.23869	2	0	0	1	0	0	NA	NA	0	0	0	0	NA
45	2016-04-26	2016-04-29	482	485	3	1	182	2.61	49.2	20.94	0.0615589	0	2.27651	3.79418	2	0	2	4	1	1	0	A	0.25	C	0.636364	B	0
46	2017-02-27	2017-03-21	789	811	5	1	182	2.61	49.2	3.14087	0.0615589	0	3.24239	6.02157	2	0	2	23	2	1	1	A	0.5	B	0.466667	C	0.5
47	2016-06-04	2016-06-30	521	547	3	1	184	0.52	75	9.93222	0.139072	0	0	2.80769	3	0	14	27	3	1	6	C	0.176471	D	0.617647	B	1
48	2015-08-28	2015-08-29	240	241	2	1	187	4.73	47.8	16.14	0.139072	0	0	15.272	3	0	0	2	0	0	NA	NA	0	0	0	0	NA
49	2015-03-04	2015-03-09	63	68	1	1	187	4.73	47.8	0	0.139072	0	0	11.7742	2	0	1	6	0	0	NA	NA	0	0	0	0	NA
50	2016-01-11	2016-01-12	376	377	3	1	189	0.52	67.8	0	0.0261474	0	0	0.973333	2	0	0	2	1	1	2	B	0.5	B	0.777778	B	0
51	2015-06-27	2015-06-29	178	180	1	1	190	2.74	91.75	2.72	0.139072	0	0	10.3107	4	0	0	3	0	0	NA	NA	0	0	0	0	NA
52	2016-01-03	2016-01-14	368	379	3	1	190	2.74	91.75	0	0.139072	0	0	9.9455	4	0	2	12	1	1	2	B	0.166667	D	0.368421	C	0
53	2016-05-06	2016-05-17	492	503	3	1	190	2.74	91.75	19.0525	0.139072	0	0.743381	11.8941	2	0	4	12	0	0	NA	NA	0	0	0	0	NA
54	2016-06-19	2016-07-02	536	549	3	1	190	2.74	91.75	13.0243	0.139072	0	0.682243	19.785	7	0	26	14	3	1	3	C	0.0909091	D	1	A	1
55	2015-11-11	2015-11-24	315	328	2	1	191	1.78	91	2.52857	0.139072	0	0	0	5	0	4	14	1	1	13	D	0.111111	D	0.333333	C	0
56	2017-10-11	2017-11-25	1015	1060	6	1	195	1.81	44.75	6.72	0.0615589	0	0	11.5187	2	0	4	46	3	1	23	D	0.5	B	0.396226	C	0.666667
57	2015-04-19	2015-04-21	109	111	1	1	195	1.81	44.75	2.78	0.0615589	0	0	3.37963	3	0	0	3	0	0	NA	NA	0	0	0	0	NA
58	2016-05-15	2016-07-10	501	557	3	1	195	1.81	44.75	17.1216	0.0615589	0	0	9.49	2	1	11	57	0	0	NA	NA	0	0	0	0	NA
59	2015-10-26	2015-12-04	299	338	2	1	2	1.45	72	7.72575	0.0994897	0	0	0	2	1	4	40	2	1	3	C	0.333333	C	0.297872	C	0
60	2016-06-19	2016-06-20	536	537	3	1	202	1.26	3.8	44.7	0.103759	0	0	1.36449	2	0	0	2	0	0	NA	NA	0	0	0	0	NA
61	2016-06-01	2016-07-27	518	574	3	1	205	99.13	0	18.6368	0.103759	0	2.11799	32.4758	2	3	10	57	2	1	2	B	0.166667	D	0.21875	D	1
62	2017-03-12	2017-03-12	802	802	5	1	205	99.13	0	19.71	0.103759	0	2.73408	28.7079	2	0	0	1	0	0	NA	NA	0	0	0	0	NA
63	2016-05-27	2016-06-20	513	537	3	1	207	1.36	82.75	21.2064	0.103759	0	0	5.70312	1	1	2	25	0	0	NA	NA	0	0	0	0	NA
64	2016-06-07	2016-06-07	524	524	3	1	210	0.32	24.25	3.27	0.103759	0	0	0.697897	1	1	0	1	0	0	NA	NA	0	0	0	0	NA
65	2016-06-09	2016-06-17	526	534	3	1	211	8.7	3.4	8.53667	0.103759	0	4.17143	8.34286	2	1	1	9	1	1	1	A	0.333333	C	0.4375	C	1
66	2015-12-25	2015-12-28	359	362	2	1	212	4.12	14.2	0	0.103759	0	0	0	8	0	1	4	1	1	3	C	0.111111	D	0.636364	B	0
67	2016-06-22	2016-07-07	539	554	3	1	212	4.12	14.2	16.8825	0.103759	0	0.678439	6.78439	2	1	5	16	2	1	8	D	0.285714	C	0.608696	B	1
68	2017-08-22	2017-08-27	965	970	6	1	214	2.2	17.2	9.35	0.103759	0	1.51452	3.02905	3	2	1	6	2	1	1	A	0.5	B	1.07692	A	1
69	2017-11-25	2017-11-25	1060	1060	6	1	215	0.75	15.25	30.03	0.103759	0	0.68933	1.72332	1	1	0	1	1	1	2	B	1	A	0.875	B	1
70	2016-02-28	2016-02-28	424	424	3	1	216	2.83	60	0	0.103759	0	0.862884	0	2	0	0	1	1	1	1	A	0.5	B	0.875	B	0
71	2017-10-22	2017-11-19	1026	1054	6	1	217	37.74	1.25	6.05586	0.103759	0	2.84878	8.19024	4	0	5	29	6	1	1	A	0.666667	B	1.16667	A	0.833333
72	2016-05-02	2016-05-04	488	490	3	1	217	37.74	1.25	24.8	0.103759	0	2.99795	7.49487	4	0	0	3	0	0	NA	NA	0	0	0	0	NA
73	2016-05-29	2016-06-12	515	529	3	1	217	37.74	1.25	16.936	0.103759	0	2.84047	9.94163	3	4	3	15	3	1	1	A	0.5	B	0.954545	B	1
74	2017-06-25	2017-06-26	907	908	5	1	219	10.27	4.75	22.935	0.103759	0	0	0.40287	1	2	0	2	1	1	1	A	1	A	0.777778	B	1
75	2017-02-27	2017-02-27	789	789	5	1	22	1.96	54.25	0	0.0994897	0	0	1.38959	2	0	0	1	0	0	NA	NA	0	0	0	0	NA
76	2016-06-10	2016-08-02	527	580	3	1	221	96.39	0	16.6111	0.103759	0	6.24525	24.2871	4	2	11	54	7	1	3	C	0.466667	C	0.803279	B	1
77	2016-10-23	2016-11-22	662	692	4	1	221	96.39	0	4.18936	0.103759	0	9.38729	29.2663	2	1	3	31	2	1	2	B	0.4	C	0.368421	C	1
78	2017-06-28	2017-07-01	910	913	5	1	221	96.39	0	9.6	0.103759	0	8.83388	25.297	2	1	0	4	2	1	2	B	1	A	1.27273	A	1
79	2016-06-01	2016-06-01	518	518	3	1	223	93.19	0.4	48.24	0.103759	0	0	6.35397	2	2	0	1	0	0	NA	NA	0	0	0	0	NA
80	2016-06-26	2016-06-28	543	545	3	1	223	93.19	0.4	13.94	0.103759	0	0	7.40775	2	1	0	3	0	0	NA	NA	0	0	0	0	NA
81	2016-11-02	2016-11-03	672	673	4	1	224	102.17	0.5	0	0.103759	0	7.07154	16.8629	2	1	0	2	1	1	2	B	0.5	B	0.777778	B	1
82	2015-03-21	2015-03-22	80	81	1	1	224	102.17	0.5	7.215	0.103759	0	0	18.481	4	0	0	2	0	0	NA	NA	0	0	0	0	NA
83	2016-02-01	2016-02-26	397	422	3	1	225	90.35	0.25	2.57885	0.103759	0	10.1389	44.2424	2	0	3	26	1	1	14	D	0.2	D	0.212121	D	0
84	2016-05-03	2016-07-11	489	558	3	1	225	90.35	0.25	20.8603	0.103759	0	9.72336	40.3893	3	0	30	70	14	1	17	D	0.424242	C	1.27273	A	0.928571
85	2017-05-23	2017-05-26	874	877	5	1	225	90.35	0.25	4.2075	0.103759	0	16.7239	45.9908	3	2	2	4	6	1	1	A	1.2	A	3.81818	A	0.666667
86	2017-10-25	2017-10-25	1029	1029	6	1	227	2.83	15.2	0	0.103759	0	2.48541	4.97082	2	0	0	1	1	1	1	A	0.5	B	0.875	B	1
87	2016-06-05	2016-06-06	522	523	3	1	227	2.83	15.2	3.405	0.103759	0	3.50288	7.00576	2	0	0	2	1	1	2	B	0.5	B	0.777778	B	1
88	2016-06-30	2016-06-30	547	547	3	1	228	20.56	22.4	0	0.0611958	0	0	2.00549	1	1	0	1	1	1	1	A	1	A	0.875	B	1
89	2016-06-16	2016-06-26	533	543	3	1	23	2.35	70	7.77273	0.0994897	0	0	0	2	0	1	11	0	0	NA	NA	0	0	0	0	NA
90	2017-09-27	2017-10-18	1001	1022	6	1	232	2	34.75	6.17591	0.103759	0	1.095	6.57	2	0	1	22	3	1	1	A	1	A	0.724138	B	0.666667
91	2016-04-06	2016-04-16	462	472	3	1	232	2	34.75	2.53091	0.103759	0	0	1.58351	2	1	3	11	0	0	NA	NA	0	0	0	0	NA
92	2017-10-12	2017-10-12	1016	1016	6	1	233	2.78	19.3333	0	0.103759	0	1.43842	8.63054	2	0	0	1	0	0	NA	NA	0	0	0	0	NA
93	2016-03-01	2016-03-08	426	433	3	1	234	3.17	19.2	0.945	0.103759	0	1.71765	10.3059	2	0	1	8	0	0	NA	NA	0	0	0	0	NA
94	2017-11-16	2017-11-18	1051	1053	6	1	237	3.19	14.8	2.95	0.103759	0	1.04286	2.08571	4	0	0	3	1	1	1	A	0.25	C	0.7	B	1
95	2017-04-03	2017-04-05	824	826	5	1	239	1.76	19.5	1.91	0.0611958	0	0.443499	0.443499	2	1	0	3	0	0	NA	NA	0	0	0	0	NA
96	2015-12-14	2016-01-18	348	383	2	1	24	3.78	53	0.410833	0.0994897	0	1.05187	7.36311	2	0	6	36	3	1	5	C	0.375	C	0.488372	C	0
97	2015-06-24	2015-06-24	175	175	1	1	240	3.68	26.8	0	0.103759	0	0	0	2	0	0	1	2	1	2	B	1	A	1.75	A	0
98	2017-11-18	2017-11-20	1053	1055	6	1	241	68.48	0	1.69	0.103759	0	7.98004	20.4705	5	1	0	3	2	1	1	A	0.4	C	1.4	A	0.5
99	2015-10-03	2015-11-10	276	314	2	1	241	68.48	0	9.19077	0.103759	0	2.65455	22.5636	3	0	12	39	6	1	4	C	0.4	C	0.913043	B	0
100	2015-02-27	2015-03-30	58	89	1	1	241	68.48	0	0.88125	0.103759	0	0	12.807	2	0	10	32	0	0	NA	NA	0	0	0	0	NA
101	2017-03-05	2017-03-06	795	796	5	1	241	68.48	0	0	0.103759	0	5.51637	21.6058	2	0	0	2	0	0	NA	NA	0	0	0	0	NA
102	2017-01-12	2017-01-12	743	743	5	1	247	1.48	12.75	0	0.103759	0	0.491914	2.95148	3	0	0	1	0	0	NA	NA	0	0	0	0	NA
103	2017-08-12	2017-08-12	955	955	6	1	248	3.08	7.5	34.38	0.103759	0	1.5304	0.3826	2	0	0	1	0	0	NA	NA	0	0	0	0	NA
104	2016-06-22	2016-06-25	539	542	3	1	249	3.12	4.4	19.9875	0.103759	0	0.678439	2.03532	3	0	1	4	1	1	2	B	0.25	C	0.636364	B	1
105	2016-04-30	2016-05-01	486	487	3	1	252	1.13	53.5	8.31	0.103759	0	0	1.50515	2	0	0	2	0	0	NA	NA	0	0	0	0	NA
106	2016-02-19	2016-03-07	415	432	3	1	253	35.04	3.5	0.768333	0.103759	0	0	0.881643	2	1	1	18	1	1	19	D	0.333333	C	0.28	C	0
107	2016-06-09	2016-06-11	526	528	3	1	253	35.04	3.5	1.4	0.103759	0	0.695238	3.47619	1	2	0	3	0	0	NA	NA	0	0	0	0	NA
108	2017-10-27	2017-10-28	1031	1032	6	1	255	1.72	18	0	0.103759	0	1.41748	3.54369	2	0	0	2	1	1	1	A	0.5	B	0.777778	B	1
109	2016-06-02	2016-06-15	519	532	3	1	255	1.72	18	15.1714	0.103759	0	0.704633	2.81853	1	1	1	14	1	1	14	D	0.5	B	0.333333	C	1
110	2016-06-18	2016-06-18	535	535	3	1	256	1.75	12.6	16.38	0.103759	0	3.4176	0	1	1	0	1	0	0	NA	NA	0	0	0	0	NA
111	2017-11-13	2017-11-13	1048	1048	6	1	257	1.83	7.4	5.07	0.103759	0	1.04585	0.348615	1	1	0	1	1	1	1	A	1	A	0.875	B	1
112	2016-05-19	2016-06-20	505	537	3	1	258	3.32	20.75	23.2564	0.103759	0	0	0.724206	2	1	9	33	1	1	27	D	0.0909091	D	0.175	D	1
113	2017-06-25	2017-06-26	907	908	5	1	258	3.32	20.75	22.935	0.103759	0	0.80574	6.84879	1	2	0	2	1	1	1	A	1	A	0.777778	B	1
114	2016-05-30	2016-05-30	516	516	3	1	259	1.39	24.75	34.86	0.103759	0	0.708738	3.54369	1	1	0	1	0	0	NA	NA	0	0	0	0	NA
115	2015-03-07	2015-03-18	66	77	1	1	260	3.83	25.75	0	0.103759	0	0	0	2	0	13	12	0	0	NA	NA	0	0	0	0	NA
116	2016-06-28	2016-07-14	545	561	3	1	262	4.04	6	14.7071	0.103759	0	0.670956	9.39338	4	2	2	17	3	1	2	B	0.5	B	0.875	B	1
117	2017-05-19	2017-05-19	870	870	5	1	262	4.04	6	0	0.103759	0	2.52014	9.66053	1	1	0	1	1	1	0	A	1	A	0.875	B	1
118	2015-12-16	2015-12-16	350	350	2	1	263	2.81	34.75	4.2	0.103759	0	0	5.22923	2	0	0	1	0	0	NA	NA	0	0	0	0	NA
119	2016-02-18	2016-02-18	414	414	3	1	263	2.81	34.75	0	0.103759	0	0	6.18644	2	0	0	1	1	1	5	C	0.5	B	0.875	B	0
120	2016-06-07	2016-07-04	524	551	3	1	263	2.81	34.75	12.4564	0.103759	0	1.39579	7.67686	2	0	6	28	1	1	13	D	0.125	D	0.2	D	1
121	2015-12-21	2016-01-05	355	370	2	1	27	4.96	53.75	0.451875	0.0994897	0	0	4.12429	3	0	1	16	1	1	1	A	0.25	C	0.304348	C	0
122	2017-10-10	2017-10-11	1014	1015	6	1	277	23.42	2.75	0	0.103759	0	1.80158	3.96347	1	1	0	2	1	1	1	A	1	A	0.777778	B	1
123	2017-11-27	2017-11-27	1062	1062	6	1	279	2.13	7.25	0	0.103759	0	1.03205	0.68803	1	1	0	1	1	1	1	A	1	A	0.875	B	1
124	2017-09-07	2017-09-07	981	981	6	1	281	3.88	24.75	69.21	0.103759	0	2.23469	2.97959	2	0	0	1	0	0	NA	NA	0	0	0	0	NA
125	2017-04-05	2017-04-06	826	827	5	1	282	2.12	14.5	0	0.103759	0	0.442424	2.21212	2	0	0	2	0	0	NA	NA	0	0	0	0	NA
126	2017-11-27	2017-11-27	1062	1062	6	1	283	1.83	25.3333	0	0.103759	0	2.75212	4.12818	1	2	0	1	1	1	1	A	1	A	0.875	B	1
127	2017-06-26	2017-07-09	908	921	5	1	283	1.83	25.3333	15.5357	0.103759	0	0.804851	2.81698	1	1	0	14	3	1	2	B	3	A	1	A	1
128	2017-10-24	2017-10-29	1028	1033	6	1	284	92.83	0	2.08	0.103759	0	0.355404	0.355404	2	0	1	6	0	0	NA	NA	0	0	0	0	NA
129	2017-10-11	2017-11-28	1015	1063	6	1	287	54	0	5.29469	0.103759	0	17.2781	43.1953	3	0	13	49	14	1	7	C	0.875	B	1.75	A	0.928571
130	2015-07-20	2015-12-10	201	344	2	1	287	54	0	10.2371	0.103759	0	0	40.15	2	2	36	144	13	1	1	A	0.342105	C	0.602649	B	0
131	2016-06-15	2016-08-03	532	581	3	1	287	54	0	16.5204	0.103759	0	11.6855	48.1168	3	0	11	50	6	1	1	A	0.428571	C	0.736842	B	1
132	2015-03-29	2015-04-05	88	95	1	1	287	54	0	3.3525	0.103759	0	0	67.1264	2	0	2	8	0	0	NA	NA	0	0	0	0	NA
133	2015-12-09	2016-01-21	343	386	2	1	289	92.88	0	1.43864	0.103759	0	6.40351	17.076	4	0	4	44	3	1	1	A	0.375	C	0.411765	C	0
134	2016-05-21	2016-07-04	507	551	3	1	289	92.88	0	23.886	0.103759	0	7.21344	19.4763	2	0	9	45	4	1	4	C	0.363636	C	0.538462	B	1
135	2017-11-28	2017-11-29	1063	1064	6	1	291	85.25	0	0	0.103759	0	0	0	1	2	0	2	1	1	1	A	1	A	0.777778	B	1
136	2017-10-18	2017-10-18	1022	1022	6	1	292	1.5	74.75	22.05	0.103759	0	0	0	2	0	0	1	1	1	1	A	0.5	B	0.875	B	1
137	2016-06-25	2016-06-25	542	542	3	1	293	94.12	0	51.45	0.103759	0	0	0.674677	1	1	0	1	1	1	2	B	1	A	0.875	B	1
138	2017-05-17	2017-05-17	868	868	5	1	294	88.27	0	69.48	0.103759	0	0	0.841984	1	1	0	1	1	1	1	A	1	A	0.875	B	1
139	2016-05-03	2016-06-26	489	543	3	1	296	4.67	27.8	18.5389	0.0615589	0	2.9918	8.97541	2	0	7	55	7	1	17	D	0.777778	B	0.790323	B	0.857143
140	2016-06-30	2016-06-30	547	547	3	1	297	95.38	0.25	0	0.103759	0	2.67399	5.34799	1	1	0	1	1	1	1	A	1	A	0.875	B	1
141	2016-06-01	2016-07-11	518	558	3	1	3	4.35	54.75	9.87585	0.0994897	0	0	4.94197	2	0	9	41	1	1	27	D	0.0909091	D	0.145833	D	1
142	2017-08-23	2017-08-23	966	966	6	1	302	3.13	8.4	1.86	0.103759	0	1.13472	4.53886	1	1	0	1	1	1	1	A	1	A	0.875	B	1
143	2016-05-25	2016-06-10	511	527	3	1	303	5.36	8.4	23.7459	0.103759	0	2.14706	4.29412	2	1	3	17	3	1	1	A	0.6	B	0.875	B	1
144	2016-06-09	2016-07-14	526	561	3	1	307	2.13	16.5	17.2767	0.103759	0	0	2.08571	2	0	11	36	4	1	5	C	0.307692	C	0.651163	B	1
145	2017-05-21	2017-05-22	872	873	5	1	307	2.13	16.5	19.515	0.103759	0	4.19059	9.63835	1	2	0	2	1	1	1	A	1	A	0.777778	B	1
146	2017-07-15	2017-07-15	927	927	6	1	307	2.13	16.5	0	0.103759	0	4.73002	9.85421	2	0	0	1	1	1	2	B	0.5	B	0.875	B	1
147	2016-10-09	2016-10-23	648	662	4	1	309	3.81	24.8	11.89	0.103759	0	1.12828	2.25657	7	1	2	15	3	1	2	B	0.333333	C	0.954545	B	1
148	2017-06-13	2017-06-19	895	901	5	1	309	3.81	24.8	15.1243	0.103759	0	2.04139	5.30761	2	0	1	7	3	1	1	A	1	A	1.5	A	1
149	2015-07-26	2015-08-17	207	229	2	1	31	0.28	72.75	10.1139	0.0994897	0	0	12.4029	1	2	8	23	0	0	NA	NA	0	0	0	0	NA
150	2016-06-09	2016-06-29	526	546	3	1	31	0.28	72.75	6.62857	0.0994897	0	0	15.9905	2	0	3	21	0	0	NA	NA	0	0	0	0	NA
151	2015-02-15	2015-02-23	46	54	1	1	313	88.88	0.5	2.03667	0.103759	0	0	16.2222	2	0	1	9	0	0	NA	NA	0	0	0	0	NA
152	2016-05-16	2016-05-27	502	513	3	1	315	1.43	34.5	25.715	0.103759	0	0	0.728543	4	0	3	12	0	0	NA	NA	0	0	0	0	NA
153	2017-03-07	2017-03-07	797	797	5	1	315	1.43	34.5	0	0.103759	0	0	4.12688	2	0	0	1	0	0	NA	NA	0	0	0	0	NA
154	2017-06-12	2017-06-12	894	894	5	1	315	1.43	34.5	0	0.103759	0	0	4.49608	2	0	0	1	0	0	NA	NA	0	0	0	0	NA
155	2016-03-02	2016-03-03	427	428	3	1	317	2.42	27.25	0	0.103759	0	0	0	6	0	0	2	0	0	NA	NA	0	0	0	0	NA
156	2017-07-28	2017-07-29	940	941	6	1	318	1.48	55.8	5.88	0.103759	0	0.777423	0	3	0	0	2	1	1	6	C	0.333333	C	0.777778	B	1
157	2017-10-26	2017-12-10	1030	1075	6	1	321	93	0.25	4.08065	0.103759	0	11.3508	31.2148	2	1	4	46	7	1	1	A	1.16667	A	0.924528	B	0.857143
158	2016-03-21	2016-07-14	446	561	3	1	321	93	0.25	14.4209	0.103759	0	4.92135	27.0674	2	1	19	116	7	1	3	C	0.333333	C	0.398374	C	0.714286
159	2017-05-09	2017-05-12	860	863	5	1	321	93	0.25	0	0.103759	0	10.1979	32.2934	2	0	1	4	2	1	2	B	0.666667	B	1.27273	A	0.5
160	2015-07-15	2015-07-17	196	198	2	1	323	3.42	31.75	27.94	0.103759	0	3.74359	31.8205	2	1	0	3	0	0	NA	NA	0	0	0	0	NA
161	2016-06-13	2016-07-09	530	556	3	1	323	3.42	31.75	14.4311	0.103759	0	2.06994	13.7996	2	0	6	27	0	0	NA	NA	0	0	0	0	NA
162	2015-03-09	2015-03-22	68	81	1	1	323	3.42	31.75	0.936429	0.103759	0	0	0	2	0	5	14	0	0	NA	NA	0	0	0	0	NA
163	2017-07-22	2017-07-23	934	935	6	1	323	3.42	31.75	3.135	0.103759	0	1.17363	11.3451	2	0	0	2	1	1	3	C	0.5	B	0.777778	B	1
164	2017-11-13	2017-11-16	1048	1051	6	1	324	88.31	0	13.0725	0.103759	0	2.78892	6.62369	2	0	0	4	2	1	1	A	1	A	1.27273	A	1
165	2015-03-22	2015-03-23	81	82	1	1	324	88.31	0	7.215	0.103759	0	4.5625	18.25	1	1	0	2	0	0	NA	NA	0	0	0	0	NA
166	2017-06-17	2017-06-17	899	899	5	1	324	88.31	0	8.79	0.103759	0	2.43875	6.9098	2	0	0	1	1	1	2	B	0.5	B	0.875	B	1
167	2016-03-14	2016-03-14	439	439	3	1	325	14.33	31.2	0	0.125804	0.863449	0	1.66667	2	0	0	1	0	0	NA	NA	0	0	0	0	NA
168	2016-06-16	2016-06-22	533	539	3	1	325	14.33	31.2	5.19429	0.125804	0.863449	0	2.74436	2	0	1	7	0	0	NA	NA	0	0	0	0	NA
169	2016-05-02	2016-05-08	488	494	3	1	328	15.87	30.25	11.2457	0.125804	0.863449	0	6.74538	4	0	2	7	0	0	NA	NA	0	0	0	0	NA
170	2017-04-13	2017-04-16	834	837	5	1	328	15.87	30.25	0	0.125804	0.863449	0.438175	8.76351	3	0	1	4	0	0	NA	NA	0	0	0	0	NA
171	2015-07-15	2015-07-16	196	197	2	1	329	15.15	30.5	24.03	0.125804	0.863449	0	1.87179	2	0	0	2	0	0	NA	NA	0	0	0	0	NA
172	2016-05-02	2016-05-05	488	491	3	1	329	15.15	30.5	11.895	0.125804	0.863449	0	4.49692	2	0	1	4	0	0	NA	NA	0	0	0	0	NA
173	2015-07-19	2015-07-31	200	212	2	1	33	1.64	58.2	8.07692	0.0994897	0	0	3.66834	4	0	1	13	0	0	NA	NA	0	0	0	0	NA
174	2016-08-18	2016-08-26	596	604	4	1	330	1.83	55.4	2.63333	0.0261474	0	0	0.613445	5	1	1	9	1	1	2	B	0.166667	D	0.4375	C	1
175	2016-05-05	2016-05-09	491	495	3	1	332	2	37.8	13.596	0.125804	0.863449	0	2.23469	2	0	1	5	1	1	11	D	0.333333	C	0.583333	B	1
176	2017-05-28	2017-06-16	879	898	5	1	332	2	37.8	8.9055	0.125804	0.863449	1.24715	7.48292	3	0	2	20	1	1	20	D	0.2	D	0.259259	C	0
177	2015-12-30	2016-01-18	364	383	2	1	333	1.22	38.2	0	0.0994897	0	0	4.02204	2	0	1	20	1	1	2	B	0.333333	C	0.259259	C	0
178	2017-02-23	2017-02-23	785	785	5	1	333	1.22	38.2	0	0.0994897	0	1.39668	7.44898	2	0	0	1	2	1	0	A	1	A	1.75	A	0
179	2017-09-02	2017-09-02	976	976	6	1	333	1.22	38.2	3.93	0.0994897	0	2.24615	8.61026	2	0	0	1	1	1	4	C	0.5	B	0.875	B	1
180	2016-06-13	2016-06-14	530	531	3	1	336	1.4	50.6	8.82	0.0301657	0.830055	0	2.75992	2	0	0	2	0	0	NA	NA	0	0	0	0	NA
181	2017-07-17	2017-08-13	929	956	6	1	34	1.78	105.5	10.0446	0.0412294	0	0	2.75323	2	0	5	28	8	1	2	B	1.14286	A	1.6	A	0.25
182	2016-05-02	2016-05-04	488	490	3	1	341	15	30.25	15.86	0.125804	0.863449	0	2.99795	6	0	0	3	4	1	1	A	0.666667	B	2.8	A	0.5
183	2016-06-27	2016-06-27	544	544	3	1	342	14.42	30.25	3.48	0.125804	0.863449	1.34438	1.34438	2	0	0	1	0	0	NA	NA	0	0	0	0	NA
184	2015-09-22	2015-10-08	265	281	2	1	347	3.7	38.75	18.5912	0.125804	0.863449	0	4.14773	2	0	2	17	0	0	NA	NA	0	0	0	0	NA
185	2016-05-09	2016-05-09	495	495	3	1	347	3.7	38.75	36.84	0.125804	0.863449	0	6.6498	2	0	0	1	0	0	NA	NA	0	0	0	0	NA
186	2016-06-09	2016-07-27	526	574	3	1	35	1.79	78.1667	13.2753	0.0412294	0	0	2.08571	3	0	19	49	2	1	35	D	0.0909091	D	0.25	C	1
187	2017-05-05	2017-05-05	856	856	5	1	350	1	39.2	0	0.0994897	0	0	0	2	0	0	1	1	1	1	A	0.5	B	0.875	B	0
188	2015-09-20	2015-09-25	263	268	2	1	352	5.32	25.5	41.41	0.125804	0.863449	0	4.17939	3	0	1	6	0	0	NA	NA	0	0	0	0	NA
189	2017-01-28	2017-01-28	759	759	5	1	352	5.32	25.5	0	0.125804	0.863449	0.963061	7.22296	2	0	0	1	1	1	2	B	0.5	B	0.875	B	0
190	2017-05-17	2017-05-18	868	869	5	1	352	5.32	25.5	45.855	0.125804	0.863449	1.68397	8.41984	2	0	0	2	2	1	0	A	1	A	1.55556	A	0.5
191	2017-04-24	2017-04-26	845	847	5	1	355	0.88	75.6	33.9	0.125804	0.863449	0	0.864929	2	0	0	3	2	1	1	A	1	A	1.4	A	1
192	2015-07-12	2015-07-14	193	195	2	1	356	2.74	113.6	6.04	0.125804	0.863449	0	0	4	0	0	3	0	0	NA	NA	0	0	0	0	NA
193	2016-05-06	2016-05-06	492	492	3	1	356	2.74	113.6	5.67	0.125804	0.863449	0	2.97352	1	1	0	1	0	0	NA	NA	0	0	0	0	NA
194	2015-07-17	2015-07-22	198	203	2	1	357	2.71	117.6	5.92	0.125804	0.863449	0	1.85279	2	0	1	6	0	0	NA	NA	0	0	0	0	NA
195	2015-09-17	2015-10-11	260	284	2	1	363	2.42	30	17.4684	0.125804	0.863449	0	12.6834	2	2	2	25	0	0	NA	NA	0	0	0	0	NA
196	2015-12-28	2016-02-08	362	404	2	1	363	2.42	30	0.139535	0.125804	0.863449	0	13.144	2	0	3	43	1	1	4	C	0.2	D	0.14	D	0
197	2016-05-02	2016-05-06	488	492	3	1	363	2.42	30	10.65	0.125804	0.863449	0.749487	13.4908	3	0	1	5	0	0	NA	NA	0	0	0	0	NA
198	2016-06-16	2016-08-03	533	581	3	1	363	2.42	30	11.9663	0.125804	0.863449	0.68609	15.7801	2	0	9	49	1	1	48	D	0.0909091	D	0.125	D	1
199	2017-04-03	2017-05-27	824	878	5	1	363	2.42	30	22.0222	0.125804	0.863449	6.65249	19.9575	2	0	9	55	5	1	18	D	0.454545	C	0.564516	B	0.4
200	2015-07-29	2015-07-29	210	210	2	1	364	3.57	73.75	0	0.0261474	0	0	8.73206	2	1	0	1	0	0	NA	NA	0	0	0	0	NA
201	2017-02-06	2017-02-06	768	768	5	1	367	15	30.25	0	0.125804	0.863449	1.42764	2.85528	2	0	0	1	0	0	NA	NA	0	0	0	0	NA
202	2017-10-27	2017-12-05	1031	1070	6	1	370	2.22	60.25	7.2555	0.125804	0.863449	2.48058	12.7573	3	0	5	40	6	1	3	C	0.75	B	0.893617	B	1
203	2016-01-13	2016-02-19	378	415	3	1	370	2.22	60.25	1.01763	0.125804	0.863449	0	13.5544	2	0	3	38	0	0	NA	NA	0	0	0	0	NA
204	2016-02-05	2016-02-24	401	420	3	1	371	2.63	34.5	1.9335	0.125804	0.863449	0.9125	0.9125	2	0	1	20	0	0	NA	NA	0	0	0	0	NA
205	2016-05-05	2016-05-05	491	491	3	1	371	2.63	34.5	0	0.125804	0.863449	0.744898	2.97959	1	1	0	1	0	0	NA	NA	0	0	0	0	NA
206	2016-06-05	2016-06-10	522	527	3	1	371	2.63	34.5	4.995	0.125804	0.863449	0.700576	3.50288	2	0	2	6	0	0	NA	NA	0	0	0	0	NA
207	2017-10-01	2017-10-03	1005	1007	6	1	375	3.08	46.25	4.39	0.125804	0.863449	0.727092	2.54482	2	0	0	3	0	0	NA	NA	0	0	0	0	NA
208	2015-08-04	2015-08-23	216	235	2	1	376	1.91	44.5	12.8025	0.125804	0.863449	0	0	3	3	2	20	0	0	NA	NA	0	0	0	0	NA
209	2016-01-04	2016-01-04	369	369	3	1	376	1.91	44.5	0	0.125804	0.863449	0	4.95924	2	0	0	1	0	0	NA	NA	0	0	0	0	NA
210	2017-04-08	2017-04-24	829	845	5	1	38	0.78	29.5	17.2818	0.0412294	0	0	0.881643	5	0	2	17	1	1	18	D	0.142857	D	0.291667	C	0
211	2016-06-11	2016-06-13	528	530	3	1	385	13.08	31	9.22	0.125804	0.863449	1.3852	4.1556	2	0	0	3	0	0	NA	NA	0	0	0	0	NA
212	2015-07-06	2015-07-26	187	207	2	1	386	1.48	59.3333	11.6014	0.0261474	0	0	11.7742	3	0	5	21	0	0	NA	NA	0	0	0	0	NA
213	2016-01-10	2016-02-06	375	402	3	1	389	1.71	38.75	0.214286	0.125804	0.863449	0	2.92781	2	0	3	28	0	0	NA	NA	0	0	0	0	NA
214	2016-06-06	2016-07-16	523	563	3	1	389	1.71	38.75	10.9683	0.125804	0.863449	0.699234	7.69157	5	0	11	41	1	1	44	D	0.0625	D	0.145833	D	1
215	2017-05-05	2017-06-26	856	908	5	1	389	1.71	38.75	10.817	0.125804	0.863449	2.1345	14.9415	2	0	10	53	8	1	1	A	0.666667	B	0.933333	B	0.25
216	2017-10-13	2017-10-22	1017	1026	6	1	390	15.52	31.2	6.462	0.125804	0.863449	5.38878	20.8366	2	0	1	10	2	1	0	A	0.666667	B	0.823529	B	1
217	2016-01-14	2016-01-15	379	380	3	1	390	15.52	31.2	0	0.125804	0.863449	0	7.72487	2	0	0	2	0	0	NA	NA	0	0	0	0	NA
218	2016-04-20	2016-04-25	476	481	3	1	390	15.52	31.2	12.555	0.125804	0.863449	0	7.68421	3	0	2	6	0	0	NA	NA	0	0	0	0	NA
219	2017-05-05	2017-09-05	856	979	5	1	390	15.52	31.2	12.1062	0.125804	0.863449	4.69591	17.5029	2	0	14	124	3	1	0	A	0.1875	D	0.160305	D	0.333333
220	2015-07-23	2015-07-26	204	207	2	1	392	2.92	43.4	15.99	0.125804	0.863449	0	3.59606	2	0	1	4	0	0	NA	NA	0	0	0	0	NA
221	2016-05-05	2016-05-09	491	495	3	1	392	2.92	43.4	13.596	0.125804	0.863449	0	8.19388	4	0	1	5	4	1	1	A	0.8	B	2.33333	A	0.25
222	2017-05-04	2017-06-16	855	898	5	1	392	2.92	43.4	12.9123	0.125804	0.863449	2.9918	10.2576	2	0	7	44	5	1	2	B	0.555556	B	0.686275	B	0.6
223	2016-06-11	2016-06-14	528	531	3	1	393	2.35	59.75	7.08	0.0994897	0	0	0.6926	2	0	1	4	0	0	NA	NA	0	0	0	0	NA
224	2016-05-08	2016-05-08	494	494	3	1	395	14.27	30.75	0	0.125804	0.863449	0	0.740365	2	0	0	1	0	0	NA	NA	0	0	0	0	NA
225	2015-07-23	2015-07-23	204	204	2	1	398	14.92	30.2	51.54	0.125804	0.863449	0	0	1	1	0	1	0	0	NA	NA	0	0	0	0	NA
226	2016-05-03	2016-05-06	489	492	3	1	399	15.38	30.25	8.4225	0.125804	0.863449	0	0	2	1	1	4	0	0	NA	NA	0	0	0	0	NA
227	2016-06-27	2016-06-30	544	547	3	1	4	1.19	49.6	6.15	0.0994897	0	0	2.01657	2	0	1	4	0	0	NA	NA	0	0	0	0	NA
228	2017-11-08	2017-11-08	1043	1043	6	1	40	5.48	22	13.68	0.0412294	0	5.25432	16.8138	2	0	0	1	0	0	NA	NA	0	0	0	0	NA
229	2016-03-03	2016-03-03	428	428	3	1	40	5.48	22	0	0.0412294	0	0	4.274	2	0	0	1	0	0	NA	NA	0	0	0	0	NA
230	2016-05-05	2016-05-14	491	500	3	1	40	5.48	22	12.993	0.0412294	0	0	5.21429	9	0	7	10	1	1	7	C	0.0625	D	0.411765	C	1
231	2017-08-13	2017-10-08	956	1012	6	1	40	5.48	22	9.28	0.0412294	0	2.67539	14.1414	5	0	6	57	8	1	1	A	0.727273	B	0.875	B	0.25
232	2016-05-02	2016-05-09	488	495	3	1	400	14	30.75	14.445	0.125804	0.863449	0	5.24641	5	0	2	8	4	1	1	A	0.571429	B	1.86667	A	0.5
233	2017-02-20	2017-03-07	782	797	5	1	400	14	30.75	0.256875	0.125804	0.863449	1.8694	13.0858	2	0	1	16	2	1	2	B	0.666667	B	0.608696	B	0
234	2017-10-29	2017-10-31	1033	1035	6	1	403	14.96	30.4	1.28	0.125804	0.863449	1.41473	2.47578	2	0	0	3	1	1	1	A	0.5	B	0.7	B	1
235	2016-05-08	2016-05-08	494	494	3	1	405	14.22	29	0	0.125804	0.863449	0	5.18256	2	0	0	1	2	1	1	A	1	A	1.75	A	0.5
236	2016-06-08	2016-06-10	525	527	3	1	406	5.65	20.25	0.26	0.354621	0.91321	0	0	2	0	0	3	0	0	NA	NA	0	0	0	0	NA
237	2017-10-02	2017-10-05	1006	1009	6	1	407	14.52	31.2	0	0.125804	0.863449	2.90547	17.0697	3	0	1	4	1	1	10	D	0.25	C	0.636364	B	1
238	2016-05-02	2016-05-10	488	496	3	1	407	14.52	31.2	14.2633	0.125804	0.863449	0	4.49692	3	0	6	9	0	0	NA	NA	0	0	0	0	NA
239	2016-06-26	2016-10-20	543	659	3	1	407	14.52	31.2	13.8818	0.125804	0.863449	0	11.4483	2	0	10	117	1	1	103	D	0.0833333	D	0.0564516	D	1
240	2017-03-14	2017-05-13	804	864	5	1	407	14.52	31.2	16.7105	0.125804	0.863449	2.27273	13.6364	2	0	9	61	1	1	39	D	0.0909091	D	0.102941	D	0
241	2015-08-22	2015-09-02	234	245	2	1	410	2.88	31	17.8425	0.0611958	0	0	0	2	0	1	12	2	1	5	C	0.666667	B	0.736842	B	0
242	2017-04-19	2017-05-02	840	853	5	1	411	2.57	33.5	40.4121	0.0611958	0	1.30513	1.74017	3	0	2	14	1	1	5	C	0.2	D	0.333333	C	1
243	2016-01-04	2016-01-08	369	373	3	1	415	3	45.6	0	0.0611958	0	0	3.96739	3	0	1	5	0	0	NA	NA	0	0	0	0	NA
244	2017-10-25	2017-10-30	1029	1034	6	1	419	2.78	43.4	1.075	0.0611958	0	1.42023	7.81128	1	1	1	6	1	1	0	A	0.5	B	0.538462	B	1
245	2015-02-09	2015-02-09	40	40	1	1	419	2.78	43.4	0	0.0611958	0	0	0	2	0	0	1	0	0	NA	NA	0	0	0	0	NA
246	2017-02-17	2017-02-18	779	780	5	1	421	32.96	21.5	0	0.0611958	0	0	3.75321	2	0	0	2	1	1	1	A	0.5	B	0.777778	B	0
247	2017-03-31	2017-04-03	821	824	5	1	425	1.7	39.5	1.4325	0.0611958	0	0	0.890244	3	0	1	4	1	1	1	A	0.25	C	0.636364	B	0
248	2017-06-17	2017-06-23	899	905	5	1	432	1.83	20.75	3.71143	0.0611958	0	0.406459	1.21938	4	2	2	7	3	1	1	A	0.5	B	1.5	A	0.666667
249	2017-03-21	2017-03-22	811	812	5	1	433	0.96	50.8	8.7	0.0611958	0	0	0	3	0	0	2	0	0	NA	NA	0	0	0	0	NA
250	2017-04-16	2017-05-02	837	853	5	1	436	2.96	29.6	36.4994	0.0611958	0	0.873206	1.30981	2	0	3	17	2	1	1	A	0.4	C	0.583333	B	1
251	2017-07-18	2017-07-25	930	937	6	1	44	5.76	44.75	6.06375	0.0412294	0	0.392896	1.57158	2	0	2	8	5	1	1	A	1.25	A	2.33333	A	0.6
252	2017-10-21	2017-10-21	1025	1025	6	1	446	2.7	161.25	0	0.0611958	0	0.356445	0	2	0	0	1	0	0	NA	NA	0	0	0	0	NA
253	2017-09-29	2017-09-29	1003	1003	6	1	448	2.91	39.1667	7.47	0.0611958	0	0	0.728543	1	1	0	1	1	1	1	A	1	A	0.875	B	0
254	2017-10-21	2017-10-21	1025	1025	6	1	455	0.5	36	0	0.0611958	0	0	1.78223	1	1	0	1	1	1	0	A	1	A	0.875	B	0
255	2017-11-09	2017-11-13	1044	1048	6	1	46	0.26	125.333	8.496	0.0412294	0	4.19942	9.79866	2	0	1	5	0	0	NA	NA	0	0	0	0	NA
256	2017-05-09	2017-05-09	860	860	5	1	46	0.26	125.333	0	0.0412294	0	0	2.12456	2	0	0	1	0	0	NA	NA	0	0	0	0	NA
257	2017-06-09	2017-06-09	891	891	5	1	46	0.26	125.333	20.13	0.0412294	0	0	2.87079	3	0	0	1	0	0	NA	NA	0	0	0	0	NA
258	2017-09-19	2017-09-30	993	1004	6	1	46	0.26	125.333	10.05	0.0412294	0	1.83972	7.35887	3	0	5	12	6	1	0	A	0.75	B	2.21053	A	0.333333
259	2017-06-26	2017-06-27	908	909	5	1	460	2.08	28	16.2	0.0611958	0	1.20728	3.62183	1	1	0	2	1	1	2	B	1	A	0.777778	B	1
260	2017-01-23	2017-01-24	754	755	5	1	463	34.17	21	0	0.0611958	0	0.969456	3.39309	1	1	0	2	1	1	1	A	1	A	0.777778	B	1
261	2017-02-24	2017-02-28	786	790	5	1	465	31.71	21	3.57	0.0611958	0	0.929936	0	3	0	1	5	3	1	3	C	0.75	B	1.75	A	0.666667
262	2017-04-05	2017-05-04	826	855	5	1	469	5.26	22.6	23.683	0.0611958	0	0.884848	4.86667	2	1	2	30	2	1	1	A	0.5	B	0.378378	C	1
263	2017-11-29	2017-11-30	1064	1065	6	1	470	3.3	36.25	0	0.0611958	0	1.37347	2.40357	2	0	0	2	1	1	1	A	0.5	B	0.777778	B	1
264	2017-10-10	2017-10-12	1014	1016	6	1	472	1.17	35.3333	0.5	0.0611958	0	0.360316	0.360316	2	1	0	3	1	1	0	A	0.5	B	0.7	B	1
265	2017-04-27	2017-05-11	848	862	5	1	475	35.39	22.8	38.536	0.0611958	0	4.30933	8.18772	2	0	1	15	2	1	1	A	0.666667	B	0.636364	B	1
266	2017-06-07	2017-06-07	889	889	5	1	475	35.39	22.8	0	0.0611958	0	4.93243	9.04279	2	0	0	1	0	0	NA	NA	0	0	0	0	NA
267	2015-07-05	2015-07-21	186	202	2	1	477	5.39	0.666667	8.64176	0.354621	0	0	5.91892	2	0	1	17	0	0	NA	NA	0	0	0	0	NA
268	2017-08-29	2017-09-27	972	1001	6	1	478	9.12	24.75	11.656	0.354621	0	0	2.63131	2	0	2	30	4	1	2	B	1	A	0.756757	B	0.5
269	2016-06-06	2016-06-08	523	525	3	1	479	2.13	37	8.3	0.125804	0.863449	0	0	2	0	0	3	0	0	NA	NA	0	0	0	0	NA
270	2016-06-17	2016-09-17	534	626	3	1	482	7.3	8.25	11.8335	0.354621	0.91321	0	12.3265	5	0	12	93	2	1	5	C	0.117647	D	0.14	D	1
271	2017-02-23	2017-03-20	785	810	5	1	482	7.3	8.25	2.85346	0.354621	0.91321	3.25893	17.2258	4	0	4	26	8	1	0	A	1	A	1.69697	A	0
272	2016-07-03	2016-07-04	550	551	4	1	483	1.04	27.25	2.865	0.354621	0.91321	0	1.99454	2	0	0	2	0	0	NA	NA	0	0	0	0	NA
273	2017-03-22	2017-04-09	812	830	5	1	485	4.56	17.75	1.11789	0.0412294	0	0	0.450062	2	0	1	19	1	1	20	D	0.333333	C	0.269231	C	1
274	2016-03-27	2016-03-28	452	453	3	1	489	18.3	0.4	0	0.354621	0	0.809313	2.42794	2	0	0	2	0	0	NA	NA	0	0	0	0	NA
275	2017-12-08	2017-12-09	1073	1074	6	1	49	2.92	31	0	0.0412294	0	3.74534	7.15019	2	0	0	2	0	0	NA	NA	0	0	0	0	NA
276	2017-07-17	2017-09-17	929	991	6	1	49	2.92	31	10.0605	0.0412294	0	1.57328	3.93319	2	0	7	63	6	1	2	B	0.666667	B	0.6	B	0.666667
277	2015-07-08	2015-07-18	189	199	2	1	495	1.54	0.75	11.3182	0.354621	0.91321	0	13.5904	3	0	4	11	0	0	NA	NA	0	0	0	0	NA
278	2016-06-15	2016-06-15	532	532	3	1	495	1.54	0.75	0	0.354621	0.91321	0.687382	19.9341	2	0	0	1	0	0	NA	NA	0	0	0	0	NA
279	2015-02-23	2015-02-23	54	54	1	1	495	1.54	0.75	0	0.354621	0.91321	0	0	2	0	0	1	0	0	NA	NA	0	0	0	0	NA
280	2017-05-27	2017-05-29	878	880	5	1	495	1.54	0.75	7.6	0.354621	0.91321	3.32953	19.1448	2	0	0	3	1	1	3	C	0.5	B	0.7	B	1
281	2015-08-11	2015-10-05	223	278	2	1	498	2.79	15.25	12.2571	0.354621	0.91321	0	13.1532	3	1	9	56	0	0	NA	NA	0	0	0	0	NA
282	2017-02-03	2017-02-04	765	766	5	1	498	2.79	15.25	0	0.354621	0.91321	1.91099	24.3652	2	0	0	2	0	0	NA	NA	0	0	0	0	NA
283	2015-10-01	2015-10-02	274	275	2	1	499	0.88	64.6	13.86	0.354621	0	0	4.01099	2	0	0	2	0	0	NA	NA	0	0	0	0	NA
284	2016-06-30	2016-07-01	547	548	3	1	499	0.88	64.6	0	0.354621	0	0	3.34249	3	0	0	2	0	0	NA	NA	0	0	0	0	NA
285	2017-01-04	2017-01-07	735	738	5	1	499	0.88	64.6	0	0.354621	0	0	4.47548	2	0	1	4	0	0	NA	NA	0	0	0	0	NA
286	2017-09-23	2017-10-13	997	1017	6	1	499	0.88	64.6	4.06714	0.354621	0	1.46586	6.96285	3	0	1	21	4	1	2	B	1	A	1	A	1
287	2015-11-15	2015-11-17	319	321	2	1	500	18.2	0.2	2.44	0.354621	0	1.1478	19.5126	2	0	0	3	0	0	NA	NA	0	0	0	0	NA
288	2016-01-16	2016-02-10	381	406	3	1	500	18.2	0.2	0	0.354621	0	2.88158	18.25	5	0	10	26	4	1	2	B	0.266667	C	0.848485	B	0
289	2015-07-07	2015-07-24	188	205	2	1	501	6.35	25.6	12.515	0.354621	0.91321	0	1.95187	6	0	10	18	2	1	7	C	0.125	D	0.56	B	0
290	2017-02-01	2017-02-12	763	774	5	1	501	6.35	25.6	1.0075	0.354621	0.91321	4.79003	18.6811	2	0	1	12	1	1	12	D	0.333333	C	0.368421	C	0
291	2017-07-27	2017-08-15	939	958	6	1	501	6.35	25.6	13.3635	0.354621	0.91321	6.61514	19.8454	2	0	1	20	3	1	0	A	1	A	0.777778	B	0.333333
292	2015-07-02	2015-08-09	183	221	2	1	503	3.24	19.3333	10.2	0.354621	0.91321	0	10.0275	2	0	3	39	0	0	NA	NA	0	0	0	0	NA
293	2017-02-01	2017-03-12	763	802	5	1	505	2.61	7	0.96375	0.354621	0.91321	0.958005	3.35302	2	0	2	40	6	1	0	A	1.5	A	0.893617	B	0
294	2015-08-26	2015-08-27	238	239	2	1	508	3.68	27.2	5.22	0.354621	0	0	0	2	0	0	2	0	0	NA	NA	0	0	0	0	NA
295	2016-01-15	2016-02-05	380	401	3	1	512	18.13	0	0	0.354621	0	0	10.5937	2	0	3	22	0	0	NA	NA	0	0	0	0	NA
296	2015-08-23	2015-09-21	235	264	2	1	513	4.13	11.5	12.069	0.354621	0.91321	0	3.11966	7	0	16	30	2	1	3	C	0.0869565	D	0.378378	C	0
297	2016-01-26	2016-02-03	391	399	3	1	513	4.13	11.5	0	0.354621	0.91321	1.87179	28.0769	3	0	6	9	0	0	NA	NA	0	0	0	0	NA
298	2016-02-26	2016-03-01	422	426	3	1	513	4.13	11.5	1.086	0.354621	0.91321	1.73397	33.8124	2	0	3	5	0	0	NA	NA	0	0	0	0	NA
299	2017-02-20	2017-07-03	782	915	5	1	513	4.13	11.5	11.316	0.354621	0.91321	2.8041	26.6389	2	0	34	134	18	1	2	B	0.5	B	0.893617	B	0.111111
300	2017-12-05	2017-12-05	1070	1070	6	1	514	8.36	13.2	0	0.0412294	0	6.82881	21.1693	2	0	0	1	0	0	NA	NA	0	0	0	0	NA
301	2017-03-26	2017-03-27	816	817	5	1	514	8.36	13.2	0	0.0412294	0	7.16564	24.184	2	0	0	2	0	0	NA	NA	0	0	0	0	NA
302	2016-06-16	2016-07-10	533	557	3	1	519	12.88	0.75	14.664	0.354621	0.91321	1.37218	1.37218	2	0	7	25	1	1	25	D	0.111111	D	0.21875	D	1
303	2017-03-20	2017-04-19	810	840	5	1	520	1.7	47.4	7.04516	0.354621	0	0.902349	0.902349	3	0	3	31	3	1	1	A	0.5	B	0.552632	B	0.333333
304	2015-08-23	2015-09-01	235	244	2	1	524	4.88	18.25	13.353	0.354621	0	3.11966	9.35897	2	0	1	10	0	0	NA	NA	0	0	0	0	NA
305	2016-02-17	2016-02-18	413	414	3	1	525	7.04	31.6	1.845	0.354621	0	0	1.77184	4	0	0	2	0	0	NA	NA	0	0	0	0	NA
306	2016-01-24	2016-02-03	389	399	3	1	526	3.19	17.5	0	0.354621	0	0.940722	2.82216	2	0	1	11	0	0	NA	NA	0	0	0	0	NA
307	2015-11-19	2015-12-05	323	339	2	1	527	16.32	0.25	10.1559	0.354621	0	0	3.40062	2	0	1	17	1	1	12	D	0.333333	C	0.291667	C	0
308	2016-01-21	2016-01-28	386	393	3	1	527	16.32	0.25	0	0.354621	0	1.8961	5.68831	2	0	1	8	2	1	0	A	0.666667	B	0.933333	B	0
309	2015-11-11	2015-12-07	315	341	2	1	531	4.43	3.8	6.66556	0.354621	0	0	16.2739	2	0	4	27	0	0	NA	NA	0	0	0	0	NA
310	2017-03-15	2017-03-15	805	805	5	1	531	4.43	3.8	22.02	0.354621	0	2.2699	14.5274	2	0	0	1	1	1	0	A	0.5	B	0.875	B	0
311	2017-04-22	2017-05-08	843	859	5	1	531	4.43	3.8	33.0582	0.354621	0	3.46793	14.7387	2	0	1	17	1	1	2	B	0.333333	C	0.291667	C	1
312	2015-07-29	2015-08-13	210	225	2	1	532	3.39	8	19.4212	0.354621	0	0	8.73206	2	1	0	16	1	1	0	A	0.5	B	0.304348	C	0
313	2015-07-20	2015-08-08	201	220	2	1	535	3.65	17	11.4825	0.354621	0.91321	0	12.775	2	0	3	20	0	0	NA	NA	0	0	0	0	NA
314	2017-02-14	2017-04-13	776	834	5	1	535	3.65	17	2.19763	0.354621	0.91321	1.4129	15.071	2	0	8	59	4	1	0	A	0.4	C	0.424242	C	0.25
315	2017-07-29	2017-07-29	941	941	6	1	535	3.65	17	13.77	0.354621	0.91321	3.49468	17.8617	2	0	0	1	2	1	2	B	1	A	1.75	A	1
316	2017-06-27	2017-06-29	909	911	5	1	542	3.96	19	14.74	0.354621	0	0.401982	0.401982	3	0	0	3	1	1	2	B	0.333333	C	0.7	B	1
317	2015-11-21	2015-12-12	325	346	2	1	543	7.24	9.2	9.83727	0.354621	0	0	12.392	2	0	3	22	1	1	12	D	0.2	D	0.241379	D	0
318	2017-05-31	2017-06-02	882	884	5	1	544	2.64	7.4	11.74	0.354621	0	0	0.828604	1	1	0	3	1	1	2	B	1	A	0.7	B	1
319	2015-11-22	2015-11-24	326	328	2	1	545	5.68	21.25	0	0.354621	0	0	3.36923	2	0	0	3	0	0	NA	NA	0	0	0	0	NA
320	2016-06-16	2016-06-16	533	533	3	1	545	5.68	21.25	1.77	0.354621	0	0	4.11654	2	0	0	1	0	0	NA	NA	0	0	0	0	NA
321	2017-03-16	2017-03-16	806	806	5	1	545	5.68	21.25	20.82	0.354621	0	2.7205	6.34783	2	0	0	1	1	1	0	A	0.5	B	0.875	B	0
322	2016-03-26	2016-04-01	451	457	3	1	546	3.57	23.2	0.9	0.354621	0	0	3.24444	4	0	1	7	0	0	NA	NA	0	0	0	0	NA
323	2017-09-05	2017-09-05	979	979	6	1	546	3.57	23.2	4.17	0.354621	0	6.34458	18.6605	2	0	0	1	0	0	NA	NA	0	0	0	0	NA
324	2015-12-10	2015-12-17	344	351	2	1	549	5.12	6	7.96125	0.354621	0.91321	0	14.898	2	0	3	8	1	1	8	D	0.2	D	0.466667	C	0
325	2015-02-18	2015-02-21	49	52	1	1	549	5.12	6	1.065	0.354621	0.91321	0	22.8125	2	0	1	4	0	0	NA	NA	0	0	0	0	NA
326	2017-03-20	2017-03-25	810	815	5	1	549	5.12	6	1.595	0.354621	0.91321	3.15822	10.8282	2	0	1	6	3	1	1	A	1	A	1.61538	A	0
327	2015-08-21	2015-09-13	233	256	2	1	550	2.24	11	12.6463	0.354621	0.91321	0	1.57328	4	0	14	24	1	1	21	D	0.0555556	D	0.225806	D	0
328	2015-12-11	2015-12-13	345	347	2	1	550	2.24	11	14.59	0.354621	0.91321	1.06105	20.1599	2	0	0	3	0	0	NA	NA	0	0	0	0	NA
329	2017-04-21	2017-04-21	842	842	5	1	553	1.04	8.2	0	0.0900458	0.899741	0	0.434007	2	0	0	1	1	1	0	A	0.5	B	0.875	B	1
330	2017-07-27	2017-08-01	939	944	6	1	553	1.04	8.2	7.96	0.0900458	0.899741	0.389126	1.16738	2	0	0	6	2	1	0	A	1	A	1.07692	A	0
331	2017-10-04	2017-10-05	1008	1009	6	1	554	8.65	17.5	0	0.354621	0	11.9613	32.9841	3	0	0	2	0	0	NA	NA	0	0	0	0	NA
332	2015-09-28	2015-10-04	271	277	2	1	554	8.65	17.5	7.09286	0.354621	0	1.35185	17.5741	3	0	1	7	0	0	NA	NA	0	0	0	0	NA
333	2016-01-17	2016-01-21	382	386	3	1	554	8.65	17.5	0	0.354621	0	2.87402	19.1601	2	0	1	5	0	0	NA	NA	0	0	0	0	NA
334	2016-03-19	2016-04-10	444	466	3	1	554	8.65	17.5	1.48304	0.354621	0	2.47178	20.5982	2	0	1	23	0	0	NA	NA	0	0	0	0	NA
335	2017-02-03	2017-04-03	765	824	5	1	554	8.65	17.5	1.7395	0.354621	0	8.12173	27.2317	3	0	23	60	12	1	25	D	0.461538	C	1.25373	A	0.0833333
336	2017-03-15	2017-04-01	805	822	5	1	555	2.46	107.25	2.91167	0.0261474	0	0	1.36194	4	0	1	18	4	1	0	A	0.8	B	1.12	A	0.25
337	2016-01-18	2016-02-08	383	404	3	1	556	3.88	6.75	0	0.354621	0.91321	0	1.91099	2	0	2	22	1	1	4	C	0.25	C	0.241379	D	0
338	2016-02-15	2016-02-28	411	424	3	1	558	1.56	5.4	0.651429	0.354621	0	0	6.23171	2	0	1	14	0	0	NA	NA	0	0	0	0	NA
339	2017-02-28	2017-02-28	790	790	5	1	558	1.56	5.4	0	0.354621	0	2.31305	7.40177	2	0	0	1	1	1	1	A	0.5	B	0.875	B	0
340	2016-02-16	2016-02-20	412	416	3	1	562	3.38	41.4	1.98	0.0301657	0.830055	0	1.77616	2	0	1	5	0	0	NA	NA	0	0	0	0	NA
341	2016-06-28	2016-07-21	545	568	3	1	562	3.38	41.4	15.1962	0.0301657	0.830055	0	4.02574	2	0	7	24	0	0	NA	NA	0	0	0	0	NA
342	2015-02-04	2015-02-13	35	44	1	1	563	9.04	17.3333	0.744	0.354621	0	0	0	2	0	2	10	0	0	NA	NA	0	0	0	0	NA
343	2015-07-14	2015-07-19	195	200	2	1	567	5.85	25.6	10.23	0.354621	0.91321	0	0	2	1	1	6	0	0	NA	NA	0	0	0	0	NA
344	2015-07-07	2015-07-07	188	188	2	1	568	1.79	19	7.83	0.354621	0	0	3.90374	4	0	0	1	0	0	NA	NA	0	0	0	0	NA
345	2015-08-29	2015-09-01	241	244	2	1	569	3.07	7	14.415	0.354621	0	0	9.125	3	0	4	4	0	0	NA	NA	0	0	0	0	NA
346	2017-03-14	2017-04-11	804	832	5	1	569	3.07	7	3.56172	0.354621	0	3.18182	12.2727	2	0	2	29	1	1	0	A	0.25	C	0.194444	D	0
347	2015-03-26	2015-05-18	85	138	1	1	569	3.07	7	9.41667	0.354621	0	0	0	3	0	3	54	0	0	NA	NA	0	0	0	0	NA
348	2017-11-09	2017-11-18	1044	1053	6	1	57	2.17	69	12.978	0.0412294	0	3.14957	6.99904	3	0	1	10	1	1	11	D	0.25	C	0.411765	C	1
349	2017-02-20	2017-03-07	782	797	5	1	572	3.87	61.25	0.256875	0.0261474	0	0	1.40205	2	0	1	16	0	0	NA	NA	0	0	0	0	NA
350	2017-10-27	2017-10-27	1031	1031	6	1	575	5.78	25	0	0.354621	0	0.708738	0.708738	2	0	0	1	1	1	0	A	0.5	B	0.875	B	1
351	2017-08-09	2017-08-09	952	952	6	1	575	5.78	25	7.38	0.354621	0	0	0	2	0	0	1	0	0	NA	NA	0	0	0	0	NA
352	2017-06-03	2017-06-04	885	886	5	1	576	3.8	21.5	9.945	0.0900458	0.899741	3.71606	2.89027	2	0	0	2	0	0	NA	NA	0	0	0	0	NA
353	2017-06-28	2017-06-29	910	911	5	1	578	16.73	0.2	6.78	0.354621	0	0.40154	1.60616	2	0	0	2	1	1	5	C	0.5	B	0.777778	B	0
354	2017-04-29	2017-05-12	850	863	5	1	579	1.43	0.75	15.4714	0.354621	0.91321	4.29918	6.44876	2	0	1	14	4	1	0	A	1.33333	A	1.33333	A	0.5
355	2015-02-04	2015-02-21	35	52	1	1	583	19	0	0.236667	0.354621	0	0	0	2	0	5	18	2	1	0	A	0.285714	C	0.56	B	1
356	2016-01-21	2016-02-28	386	424	3	1	583	19	0	0.932308	0.354621	0	1.8961	15.1688	2	0	3	39	2	1	0	A	0.4	C	0.304348	C	0
357	2015-01-28	2015-02-20	28	51	1	1	584	17.25	0.25	0.91625	0.354621	0.91321	0	0	3	0	7	24	0	0	NA	NA	0	0	0	0	NA
358	2015-01-22	2015-03-08	22	67	1	1	587	15.32	0.5	0.570652	0.354621	0.91321	0	34.7619	2	0	3	46	0	0	NA	NA	0	0	0	0	NA
359	2017-03-26	2017-03-26	816	816	5	1	587	15.32	0.5	0	0.354621	0.91321	1.79141	7.6135	2	0	0	1	1	1	1	A	0.5	B	0.875	B	0
360	2015-09-26	2015-10-05	269	278	2	1	588	17.71	0.333333	5.379	0.354621	0.91321	0	8.17164	2	0	2	10	0	0	NA	NA	0	0	0	0	NA
361	2015-02-05	2015-02-21	36	52	1	1	588	17.71	0.333333	0.250588	0.354621	0.91321	0	0	2	0	2	17	0	0	NA	NA	0	0	0	0	NA
362	2017-03-20	2017-03-22	810	812	5	1	59	4.65	33.5	3.19	0.0412294	0	0.451174	0.902349	4	0	0	3	4	1	0	A	1	A	2.8	A	0
363	2017-06-21	2017-06-21	903	903	5	1	595	17.35	0.25	0.93	0.354621	0.91321	0.809313	2.83259	2	0	0	1	0	0	NA	NA	0	0	0	0	NA
364	2015-07-10	2015-07-10	191	191	2	1	597	16.12	0.4	23.55	0.354621	0	0	9.60526	2	0	0	1	0	0	NA	NA	0	0	0	0	NA
365	2015-03-26	2015-04-27	85	117	1	1	597	16.12	0.4	10.0591	0.354621	0	0	0	2	0	3	33	0	0	NA	NA	0	0	0	0	NA
366	2016-02-01	2016-02-05	397	401	3	1	599	19	0	0	0.354621	0	4.60859	11.9823	2	0	1	5	0	0	NA	NA	0	0	0	0	NA
367	2016-01-23	2016-01-24	388	389	3	1	601	6.92	8	0	0.354621	0.91321	0	9.43152	3	0	0	2	0	0	NA	NA	0	0	0	0	NA
368	2016-06-15	2016-09-10	532	619	3	1	601	6.92	8	11.836	0.354621	0.91321	0	11.6855	4	0	14	88	1	1	26	D	0.0555556	D	0.0736842	D	1
369	2017-03-23	2017-04-07	813	828	5	1	601	6.92	8	0	0.354621	0.91321	3.14655	18.8793	5	0	5	16	3	1	0	A	0.3	C	0.913043	B	0
370	2017-09-05	2017-09-07	979	981	6	1	601	6.92	8	19.51	0.354621	0.91321	5.97137	22.0194	2	0	0	3	1	1	1	A	0.5	B	0.7	B	1
371	2017-06-22	2017-06-22	904	904	5	1	603	4	9.25	0	0.354621	0.91321	0	0	2	0	0	1	0	0	NA	NA	0	0	0	0	NA
372	2015-09-29	2015-10-01	272	274	2	1	606	5.54	20.25	14.03	0.354621	0.91321	0	4.04059	3	1	0	3	0	0	NA	NA	0	0	0	0	NA
373	2016-06-08	2016-06-10	525	527	3	1	606	5.54	20.25	0.26	0.354621	0.91321	0	6.96565	2	0	0	3	0	0	NA	NA	0	0	0	0	NA
374	2015-09-29	2015-10-04	272	277	2	1	609	2.84	17	8.275	0.354621	0	0	0	2	0	3	6	0	0	NA	NA	0	0	0	0	NA
375	2016-06-18	2016-07-07	535	554	3	1	61	4.08	31.75	16.56	0.0412294	0	0	2.05056	2	0	2	20	0	0	NA	NA	0	0	0	0	NA
376	2015-01-23	2015-02-19	23	50	1	1	611	16.68	0.4	0.785357	0.354621	0	0	16.5909	2	0	3	28	0	0	NA	NA	0	0	0	0	NA
377	2016-01-15	2016-01-23	380	388	3	1	611	16.68	0.4	0	0.354621	0	3.85224	13.4828	2	0	4	9	2	1	0	A	0.333333	C	0.875	B	0
378	2017-02-23	2017-03-07	785	797	5	1	611	16.68	0.4	0.486923	0.354621	0	8.84566	16.2946	4	0	1	13	6	1	0	A	1.2	A	2.1	A	0
379	2017-04-06	2017-04-06	827	827	5	1	611	16.68	0.4	0	0.354621	0	11.0472	18.1174	2	0	0	1	0	0	NA	NA	0	0	0	0	NA
380	2017-05-11	2017-06-05	862	887	5	1	611	16.68	0.4	13.7088	0.354621	0	11.0221	19.0767	2	0	2	26	3	1	25	D	0.75	B	0.636364	B	1
381	2017-07-06	2017-08-08	918	951	6	1	611	16.68	0.4	12.7024	0.354621	0	11.9411	20.2999	2	0	3	34	1	1	32	D	0.2	D	0.170732	D	1
382	2017-02-25	2017-02-25	787	787	5	1	612	0.96	22.25	0	0.354621	0.91321	0	0	2	0	0	1	1	1	3	C	0.5	B	0.875	B	0
383	2017-05-21	2017-05-21	872	872	5	1	614	5.38	27.75	0	0.354621	0	0	0.419059	2	0	0	1	1	1	1	A	0.5	B	0.875	B	0
384	2017-04-02	2017-04-02	823	823	5	1	616	7.19	26.75	0	0.0900458	0.899741	1.77616	0.444039	2	0	0	1	0	0	NA	NA	0	0	0	0	NA
385	2015-11-30	2015-12-12	334	346	2	1	62	2.22	14.5	13.4908	0.0412294	0	0	0	3	0	2	13	0	0	NA	NA	0	0	0	0	NA
386	2017-01-22	2017-01-23	753	754	5	1	62	2.22	14.5	0	0.0412294	0	0	5.3391	2	0	0	2	1	1	3	C	0.5	B	0.777778	B	0
387	2017-01-28	2017-02-21	759	783	5	1	622	5.17	7.8	0.8244	0.0900458	0.899741	1.92612	4.8153	2	0	4	25	3	1	2	B	0.5	B	0.65625	B	0
388	2016-05-25	2016-06-17	511	534	3	1	624	2.39	30	14.75	0.0900458	0.899741	0.715686	2.86275	2	0	3	24	1	1	28	D	0.2	D	0.225806	D	1
389	2017-03-31	2017-03-31	821	821	5	1	624	2.39	30	0	0.0900458	0.899741	2.67073	6.67683	2	0	0	1	1	1	1	A	0.5	B	0.875	B	0
390	2016-03-18	2016-04-08	443	464	3	1	635	5.32	17.75	1.01864	0.0900458	0.899741	1.65158	7.43213	2	0	1	22	0	0	NA	NA	0	0	0	0	NA
391	2016-01-24	2016-01-25	389	390	3	1	639	5.65	20	0	0.0900458	0.899741	0	1.88144	2	0	0	2	0	0	NA	NA	0	0	0	0	NA
392	2016-06-17	2016-08-20	534	598	3	1	64	14.25	11	12.1034	0.0412294	0	0	4.79362	6	0	16	65	2	1	22	D	0.0909091	D	0.194444	D	1
393	2017-07-15	2017-07-19	927	931	6	1	64	14.25	11	11.316	0.0412294	0	1.97084	13.4017	2	1	0	5	2	1	2	B	1	A	1.16667	A	0.5
394	2017-08-21	2017-08-24	964	967	6	1	64	14.25	11	7.32	0.0412294	0	3.03219	14.0239	5	2	3	4	2	1	3	C	0.25	C	1.27273	A	1
395	2015-07-19	2015-07-31	200	212	2	1	649	1.87	45.5	8.07692	0.0301657	0.830055	0	5.50251	2	0	1	13	0	0	NA	NA	0	0	0	0	NA
396	2016-05-27	2016-06-23	513	540	3	1	656	4.24	47.5	11.7857	0.0301657	0.830055	0	2.85156	2	0	3	28	0	0	NA	NA	0	0	0	0	NA
397	2015-07-11	2015-07-12	192	193	2	1	657	3.12	60.8	9.885	0.0301657	0.830055	0	1.91099	3	0	0	2	0	0	NA	NA	0	0	0	0	NA
398	2017-05-05	2017-05-05	856	856	5	1	658	2.65	31	0	0.354621	0.91321	0.853801	2.5614	2	0	0	1	2	1	1	A	1	A	1.75	A	0
399	2015-07-05	2015-07-06	186	187	2	1	659	4.29	26.6	2.97	0.354621	0.91321	0	5.91892	2	0	0	2	0	0	NA	NA	0	0	0	0	NA
400	2017-03-28	2017-06-05	818	887	5	1	659	4.29	26.6	18.8276	0.354621	0.91321	0	3.12729	2	0	12	70	6	1	20	D	0.428571	C	0.545455	B	0.5
401	2015-10-18	2015-10-20	291	293	2	1	666	8.7	84.2	8.66	0.0301657	0.830055	0	0	5	0	0	3	0	0	NA	NA	0	0	0	0	NA
402	2015-12-11	2015-12-11	345	345	2	1	667	3.48	119.2	0	0.0301657	0.830055	0	4.24419	2	0	0	1	2	1	0	A	1	A	1.75	A	0
403	2015-07-10	2015-07-15	191	196	2	1	670	1.79	48.6	15.38	0.0301657	0.830055	0	0	5	0	7	6	0	0	NA	NA	0	0	0	0	NA
404	2016-05-05	2016-05-07	491	493	3	1	674	8.42	88.6	11.37	0.0301657	0.830055	0	1.4898	2	0	0	3	0	0	NA	NA	0	0	0	0	NA
405	2016-01-16	2016-01-17	381	382	3	1	677	5.15	124.75	0	0.0301657	0.830055	0	0	2	0	0	2	0	0	NA	NA	0	0	0	0	NA
406	2016-06-09	2016-10-11	526	650	3	1	68	12.85	11.75	12.7997	0.0412294	0	0	4.17143	2	0	35	125	7	1	25	D	0.189189	D	0.371212	C	0.714286
407	2017-02-18	2017-03-21	780	811	5	1	68	12.85	11.75	2.6175	0.0412294	0	4.68549	22.9589	2	0	3	32	2	1	2	B	0.4	C	0.358974	C	0
408	2016-05-04	2016-06-29	490	546	3	1	680	4.44	62.6	18.9347	0.0615589	0	0.746421	10.4499	2	0	34	57	3	1	13	D	0.0833333	D	0.328125	C	1
409	2017-06-24	2017-06-26	906	908	5	1	683	4.12	26.75	6.25	0.0615589	0	0	0.403315	2	0	0	3	2	1	0	A	1	A	1.4	A	0.5
410	2016-06-10	2016-06-10	527	527	3	1	684	1.72	60	4.89	0.0615589	0	0	8.327	2	0	0	1	0	0	NA	NA	0	0	0	0	NA
411	2016-06-08	2016-06-09	525	526	3	1	686	1.72	50	0	0.0615589	0	0.696565	3.48282	2	0	0	2	0	0	NA	NA	0	0	0	0	NA
412	2015-02-16	2015-02-18	47	49	1	1	69	3.96	10.5	0	0.0412294	0	0	0	2	0	0	3	0	0	NA	NA	0	0	0	0	NA
413	2016-06-07	2016-06-11	524	528	3	1	692	2.78	39.5	1.194	0.0615589	0	0	4.88528	2	0	2	5	2	1	4	C	0.5	B	1.16667	A	1
414	2016-06-07	2016-06-13	524	530	3	1	694	2.52	39.2	9.57857	0.0615589	0	0	1.39579	15	0	1	7	3	1	2	B	0.1875	D	1.5	A	1
415	2016-05-21	2016-06-02	507	519	3	1	695	2.96	39.75	37.5231	0.0615589	0	0	1.44269	2	0	2	13	0	0	NA	NA	0	0	0	0	NA
416	2015-10-23	2015-11-11	296	315	2	1	7	15.78	62.25	4.5225	0.0994897	0	0	2.47458	3	0	7	20	2	1	6	C	0.2	D	0.518519	B	0
417	2016-06-08	2016-06-11	525	528	3	1	700	3.48	45.8	1.4925	0.0615589	0	0	0.696565	2	1	1	4	0	0	NA	NA	0	0	0	0	NA
418	2016-05-15	2016-05-31	501	517	3	1	702	2.13	43.3333	25.2088	0.0615589	0	0	0	2	0	1	17	0	0	NA	NA	0	0	0	0	NA
419	2015-07-15	2015-09-06	196	249	2	1	703	1.5	49	10.6867	0.0615589	0	0	3.74359	2	0	7	54	2	1	36	D	0.222222	D	0.229508	D	0
420	2017-02-24	2017-02-24	786	786	5	1	705	4.04	26.75	6.03	0.0615589	0	0.464968	6.97452	2	0	0	1	0	0	NA	NA	0	0	0	0	NA
421	2016-05-08	2016-05-23	494	509	3	1	710	5.67	62.3333	18.0694	0.0615589	0	0	4.44219	2	0	14	16	1	1	16	D	0.0625	D	0.304348	C	1
422	2017-05-13	2017-05-13	864	864	5	1	710	5.67	62.3333	0	0.0615589	0	0.845886	10.5736	2	0	0	1	1	1	0	A	0.5	B	0.875	B	0
423	2016-05-29	2016-05-31	515	517	3	1	712	0.84	44	35.33	0.139072	0	0	2.13035	3	0	0	3	0	0	NA	NA	0	0	0	0	NA
424	2017-04-20	2017-05-22	841	873	5	1	712	0.84	44	22.6291	0.139072	0	0.434524	4.34524	2	0	3	33	2	1	2	B	0.4	C	0.35	C	1
425	2016-06-28	2016-06-28	545	545	3	1	719	1.08	73.2	7.38	0.0261474	0	0	0	2	0	0	1	0	0	NA	NA	0	0	0	0	NA
426	2017-10-13	2017-10-15	1017	1019	6	1	720	2.42	51.75	0	0.0261474	0	0	0	3	0	0	3	3	1	0	A	1	A	2.1	A	1
427	2017-12-10	2017-12-10	1075	1075	6	1	720	2.42	51.75	0	0.0261474	0	1.01955	1.01955	2	0	0	1	0	0	NA	NA	0	0	0	0	NA
428	2017-12-03	2017-12-03	1068	1068	6	1	721	2.26	32	0	0.0261474	0	7.18369	20.5248	2	0	0	1	0	0	NA	NA	0	0	0	0	NA
429	2017-03-12	2017-05-10	802	861	5	1	721	2.26	32	13.466	0.0261474	0	2.73408	9.56929	3	0	11	60	7	1	2	B	0.5	B	0.731343	B	0.428571
430	2017-08-03	2017-11-03	946	1038	6	1	721	2.26	32	9.06258	0.0261474	0	5.02116	15.0635	2	0	19	93	8	1	20	D	0.380952	C	0.56	B	0.75
431	2015-07-14	2015-07-15	195	196	2	1	722	6.36	16.6	8.31	0.0261474	0	1.88144	1.88144	2	1	0	2	0	0	NA	NA	0	0	0	0	NA
432	2016-04-08	2016-04-09	464	465	3	1	722	6.36	16.6	0	0.0261474	0	2.36501	4.73002	2	0	0	2	0	0	NA	NA	0	0	0	0	NA
433	2017-09-29	2017-09-30	1003	1004	6	1	723	2.8	16.2	19.785	0.0261474	0	0	1.09281	2	0	0	2	1	1	1	A	0.5	B	0.777778	B	1
434	2017-12-03	2017-12-09	1068	1074	6	1	724	3.13	75.75	0	0.0261474	0	9.92034	29.0769	5	0	3	7	0	0	NA	NA	0	0	0	0	NA
435	2017-03-16	2017-04-04	806	825	5	1	724	3.13	75.75	1.5195	0.0261474	0	1.36025	12.2422	2	0	1	20	1	1	21	D	0.333333	C	0.259259	C	1
436	2017-07-13	2017-11-11	925	1046	6	1	724	3.13	75.75	9.35262	0.0261474	0	1.58009	13.8258	11	0	39	122	25	1	0	A	0.5	B	1.35659	A	0.68
437	2015-07-23	2015-07-29	204	210	2	1	729	3.08	20.8333	8.15571	0.0261474	0	7.19212	37.7586	4	1	1	7	0	0	NA	NA	0	0	0	0	NA
438	2016-06-12	2016-06-19	529	536	3	1	733	1.28	42.6	11.265	0.0261474	0	0.691288	2.76515	2	0	3	8	1	1	8	D	0.2	D	0.466667	C	1
439	2016-06-15	2016-06-15	532	532	3	1	740	6.68	17.25	0	0.0261474	0	0	4.12429	2	0	0	1	0	0	NA	NA	0	0	0	0	NA
440	2016-04-17	2016-04-17	473	473	3	1	744	2.27	38.2	5.61	0.0261474	0	1.54661	6.95975	2	0	0	1	0	0	NA	NA	0	0	0	0	NA
441	2017-08-30	2017-08-30	973	973	6	1	744	2.27	38.2	19.41	0.0261474	0	0.751029	4.88169	2	0	0	1	1	1	1	A	0.5	B	0.875	B	1
442	2017-06-02	2017-06-02	884	884	5	1	754	3.58	64.75	0	0.0261474	0	1.24009	5.78709	5	0	0	1	0	0	NA	NA	0	0	0	0	NA
443	2017-12-03	2017-12-03	1068	1068	6	1	755	2.31	28.5	0	0.0412294	0	4.44705	8.8941	3	0	0	1	0	0	NA	NA	0	0	0	0	NA
444	2017-09-20	2017-10-03	994	1007	6	1	755	2.31	28.5	6.97286	0.0412294	0	4.41088	6.61631	3	0	4	14	1	1	6	C	0.142857	D	0.333333	C	1
445	2015-07-23	2015-07-24	204	205	2	1	762	6.54	17	27.795	0.0261474	0	0	0	2	2	0	2	0	0	NA	NA	0	0	0	0	NA
446	2016-06-01	2016-06-07	518	524	3	1	767	6.52	17	20.9271	0.0261474	0	1.41199	14.8259	3	0	3	7	0	0	NA	NA	0	0	0	0	NA
447	2017-07-13	2017-07-29	925	941	6	1	767	6.52	17	10.8829	0.0261474	0	3.95022	15.4058	3	0	5	17	5	1	0	A	0.625	B	1.45833	A	0.8
448	2016-06-16	2016-06-17	533	534	3	1	77	3.96	31	5.025	0.0412294	0	0	0	3	0	0	2	0	0	NA	NA	0	0	0	0	NA
449	2017-08-14	2017-08-14	957	957	6	1	77	3.96	31	0.78	0.0412294	0	0.763598	2.67259	2	0	0	1	1	1	1	A	0.5	B	0.875	B	1
450	2016-06-26	2016-06-26	543	543	3	1	89	2.17	82.25	11.25	0.0412294	0	0	0.673432	4	0	0	1	0	0	NA	NA	0	0	0	0	NA
451	2017-06-28	2017-06-29	910	911	5	1	93	18.04	0.25	6.78	0.354621	0	0	0.40154	1	1	0	2	1	1	1	A	1	A	0.777778	B	1
452	2016-05-24	2016-05-25	510	511	3	1	98	2.4	81.8333	8.505	0.0412294	0	0	0	2	0	0	2	0	0	NA	NA	0	0	0	0	NA

## Sheet: Variables_description
Group of variables	Variable	Description
	Outbreak_ID	ID of cholera outbreak
Outbreak time	Start_date	Date of outbreak onset
	End_date	Date of outbreak end (last recorded case)
	Start	Day code of outbreak onset (1 = 1/1/2015)
	End	Day code of outbreak end (1 = 1/1/2015)
	Semester	Semester number between 1/1/2015 and 31/12/2017
Outbreak locality	Outbreak_end	Code used for AGCP models
	Loc_ID	ID of the locality of the cholera outbreak
	Densite_pop	Population density in the locality; 2015 estimates from the Worldpop project (https://www.worldpop.org/focus_areas)
Covariates	Time2cities	Travel time to the nearest city from the Malaria Atlas Project (https://map.ox.ac.uk/explorer/#/)
	PluieMoy	Mean daily accumulated rainfall during outbreak (TRMM_3B42_daily v7, https://giovanni.gsfc.nasa.gov/giovanni/)
	IncR_2010_14	Accumulated incidence rates of suspected cholera cases between 2010 and 2014 in the area (data from Haitian Ministry of Health, MSPP)
	CV_2010_14	Vaccine coverage of previous oral cholera vaccine campaigns conducted between 2012 and 2014 in the area (data from Haitian Ministry of Health, MSPP)
	PreviousCATIyear	No. of previous cases per year in the same locality from the beginning of the study
	Previous_Inc	No. of previous complete CATIs per year in the same locality from the beginning of the study
Outbreak onset	Cas_J3	No. of cases during the first 3 days of outbreak
	Cultures_pos_J3	No. of positive culture during the first 3 days of outbreak
Outbreak outcome	Cas_J4_	No. of cases from the 4th day of outbreak
	Duration	Duration of outbrteak (= End - Start + 1)
Response characeristics	CATIc7_Nb	No. of complete case-area targeted intervention implemented within 7 days after the last recorded case of the outbreak
	CATIc7_01	Outbreak response status (1 if CATIc7_Nb ≥1)
	CATIc7_delai	Response promptness : No. of days between outbreak onset and the first complete CATI
	CATIc7_delaiC	Class of response promptness : A = 0-1 day ; B = 2 days ; C = 3-7 days ; D ≥ days
	CATIc7_Cas	Response intensity : No. of complete CATIs per outbreak per accumulated cases
	CATIc7_CasC	Class of response intensity : A >= 1 complete CATI per per case ; B = [0.5-1[ complete CATI per per case ; C = [0.25-0.5[ complete CATI per per case ; D = ]0-0.25[ complete CATI per per case
	CATIc7_week	Response intensity : No. of complete CATIs per outbreak per week
	CATIc7_weekC	Class of response intensity : A >= 1 complete CATI per per week ; B = [0.5-1[ complete CATI per per week ; C = [0.25-0.5[ complete CATI per per week ; D = ]0-0.25[ complete CATI per per week
	CATIc7_ATB	Proportion of complete CATIs that included administration of prophylactic antibiotics
