# Supplementary material for: Estimating effectiveness of case-area targeted response interventions against cholera in Haiti
Source: eLife. 2019 Dec 30;8:e50243. doi: 10.7554/eLife.50243 (PMC7041943; doi:10.7554/eLife.50243)
Supplement: Figure 4—source data 1. [file elife-50243-fig4-data1.xlsx]

## Sheet: Outbreaks
Outbreak_ID	Start_date	End_date	Outbreak_end	Loc_ID	Cas_J4_	Duration	CATIc7_delaiC	CATIc7_CasC	CATIc7_weekC
1	2017-04-22	2017-04-22	1	103	0	1	B	A	A
2	2016-06-19	2016-06-20	1	105	0	2	0	0	0
3	2017-10-09	2017-10-09	1	106	0	1	0	0	0
4	2017-11-09	2017-11-09	1	106	0	1	0	0	0
5	2016-04-09	2016-04-11	1	106	0	3	0	0	0
6	2017-08-09	2017-08-15	1	106	2	7	0	0	0
7	2016-03-18	2016-03-21	1	109	3	4	C	D	A
8	2015-12-11	2015-12-24	1	11	3	14	D	C	B
9	2016-05-27	2016-05-28	1	111	0	2	0	0	0
10	2015-04-24	2015-04-24	1	1116	0	1	0	0	0
11	2016-05-27	2016-05-31	1	1118	3	5	0	0	0
12	2016-06-17	2016-08-12	1	115	8	57	0	0	0
13	2017-11-08	2017-11-08	1	117	0	1	0	0	0
14	2017-05-06	2017-08-23	1	117	17	110	D	A	A
15	2016-04-26	2016-06-26	1	118	4	62	0	0	0
16	2016-05-28	2016-05-30	1	121	0	3	C	B	B
17	2017-03-15	2017-03-16	1	124	0	2	A	B	B
18	2017-05-15	2017-05-15	1	125	0	1	B	B	B
19	2015-10-19	2015-10-21	1	131	0	3	B	D	B
20	2015-10-20	2015-10-20	1	136	0	1	A	B	B
21	2015-10-20	2015-10-20	1	138	0	1	0	0	0
22	2017-02-17	2017-04-03	1	14	4	46	A	C	C
23	2017-04-15	2017-05-01	1	145	1	17	0	0	0
24	2016-05-19	2016-05-26	1	147	1	8	A	D	B
25	2017-10-13	2017-11-08	1	150	2	27	C	C	D
26	2015-02-04	2015-02-04	1	150	0	1	0	0	0
27	2016-06-03	2016-06-28	1	150	3	26	D	D	D
28	2017-03-07	2017-03-07	1	150	0	1	A	A	A
29	2015-04-18	2015-04-21	1	151	1	4	0	0	0
30	2016-04-14	2016-05-25	1	151	5	42	A	C	C
31	2017-02-13	2017-05-22	1	151	16	99	B	B	B
32	2017-08-16	2017-08-25	1	1543	1	10	D	C	C
33	2016-06-18	2016-06-20	1	16	0	3	0	0	0
34	2016-06-18	2016-06-22	1	160	1	5	C	C	B
35	2016-01-02	2016-01-02	1	163	0	1	C	C	B
36	2016-04-06	2016-04-11	1	165	1	6	C	B	A
37	2016-06-26	2016-07-01	1	168	2	6	0	0	0
38	2016-05-19	2016-06-12	1	172	15	25	A	D	D
39	2017-06-25	2017-06-25	1	172	0	1	C	B	B
40	2015-01-31	2015-03-11	1	173	4	40	0	0	0
41	2015-01-26	2015-02-03	1	175	1	9	0	0	0
42	2015-03-08	2015-03-11	1	175	1	4	0	0	0
43	2016-06-09	2016-06-24	1	178	2	16	D	D	C
44	2017-06-03	2017-06-03	1	181	0	1	0	0	0
45	2016-04-26	2016-04-29	1	182	2	4	A	C	B
46	2017-02-27	2017-03-21	1	182	2	23	A	B	C
47	2016-06-04	2016-06-30	1	184	14	27	C	D	B
48	2015-08-28	2015-08-29	1	187	0	2	0	0	0
49	2015-03-04	2015-03-09	1	187	1	6	0	0	0
50	2016-01-11	2016-01-12	1	189	0	2	B	B	B
51	2015-06-27	2015-06-29	1	190	0	3	0	0	0
52	2016-01-03	2016-01-14	1	190	2	12	B	D	C
53	2016-05-06	2016-05-17	1	190	4	12	0	0	0
54	2016-06-19	2016-07-02	1	190	26	14	C	D	A
55	2015-11-11	2015-11-24	1	191	4	14	D	D	C
56	2017-10-11	2017-11-25	1	195	4	46	D	B	C
57	2015-04-19	2015-04-21	1	195	0	3	0	0	0
58	2016-05-15	2016-07-10	1	195	11	57	0	0	0
59	2015-10-26	2015-12-04	1	2	4	40	C	C	C
60	2016-06-19	2016-06-20	1	202	0	2	0	0	0
61	2016-06-01	2016-07-27	1	205	10	57	B	D	D
62	2017-03-12	2017-03-12	1	205	0	1	0	0	0
63	2016-05-27	2016-06-20	1	207	2	25	0	0	0
64	2016-06-07	2016-06-07	1	210	0	1	0	0	0
65	2016-06-09	2016-06-17	1	211	1	9	A	C	C
66	2015-12-25	2015-12-28	1	212	1	4	C	D	B
67	2016-06-22	2016-07-07	1	212	5	16	D	C	B
68	2017-08-22	2017-08-27	1	214	1	6	A	B	A
69	2017-11-25	2017-11-25	1	215	0	1	B	A	B
70	2016-02-28	2016-02-28	1	216	0	1	A	B	B
71	2017-10-22	2017-11-19	1	217	5	29	A	B	A
72	2016-05-02	2016-05-04	1	217	0	3	0	0	0
73	2016-05-29	2016-06-12	1	217	3	15	A	B	B
74	2017-06-25	2017-06-26	1	219	0	2	A	A	B
75	2017-02-27	2017-02-27	1	22	0	1	0	0	0
76	2016-06-10	2016-08-02	1	221	11	54	C	C	B
77	2016-10-23	2016-11-22	1	221	3	31	B	C	C
78	2017-06-28	2017-07-01	1	221	0	4	B	A	A
79	2016-06-01	2016-06-01	1	223	0	1	0	0	0
80	2016-06-26	2016-06-28	1	223	0	3	0	0	0
81	2016-11-02	2016-11-03	1	224	0	2	B	B	B
82	2015-03-21	2015-03-22	1	224	0	2	0	0	0
83	2016-02-01	2016-02-26	1	225	3	26	D	D	D
84	2016-05-03	2016-07-11	1	225	30	70	D	C	A
85	2017-05-23	2017-05-26	1	225	2	4	A	A	A
86	2017-10-25	2017-10-25	1	227	0	1	A	B	B
87	2016-06-05	2016-06-06	1	227	0	2	B	B	B
88	2016-06-30	2016-06-30	1	228	0	1	A	A	B
89	2016-06-16	2016-06-26	1	23	1	11	0	0	0
90	2017-09-27	2017-10-18	1	232	1	22	A	A	B
91	2016-04-06	2016-04-16	1	232	3	11	0	0	0
92	2017-10-12	2017-10-12	1	233	0	1	0	0	0
93	2016-03-01	2016-03-08	1	234	1	8	0	0	0
94	2017-11-16	2017-11-18	1	237	0	3	A	C	B
95	2017-04-03	2017-04-05	1	239	0	3	0	0	0
96	2015-12-14	2016-01-18	1	24	6	36	C	C	C
97	2015-06-24	2015-06-24	1	240	0	1	B	A	A
98	2017-11-18	2017-11-20	1	241	0	3	A	C	A
99	2015-10-03	2015-11-10	1	241	12	39	C	C	B
100	2015-02-27	2015-03-30	1	241	10	32	0	0	0
101	2017-03-05	2017-03-06	1	241	0	2	0	0	0
102	2017-01-12	2017-01-12	1	247	0	1	0	0	0
103	2017-08-12	2017-08-12	1	248	0	1	0	0	0
104	2016-06-22	2016-06-25	1	249	1	4	B	C	B
105	2016-04-30	2016-05-01	1	252	0	2	0	0	0
106	2016-02-19	2016-03-07	1	253	1	18	D	C	C
107	2016-06-09	2016-06-11	1	253	0	3	0	0	0
108	2017-10-27	2017-10-28	1	255	0	2	A	B	B
109	2016-06-02	2016-06-15	1	255	1	14	D	B	C
110	2016-06-18	2016-06-18	1	256	0	1	0	0	0
111	2017-11-13	2017-11-13	1	257	0	1	A	A	B
112	2016-05-19	2016-06-20	1	258	9	33	D	D	D
113	2017-06-25	2017-06-26	1	258	0	2	A	A	B
114	2016-05-30	2016-05-30	1	259	0	1	0	0	0
115	2015-03-07	2015-03-18	1	260	13	12	0	0	0
116	2016-06-28	2016-07-14	1	262	2	17	B	B	B
117	2017-05-19	2017-05-19	1	262	0	1	A	A	B
118	2015-12-16	2015-12-16	1	263	0	1	0	0	0
119	2016-02-18	2016-02-18	1	263	0	1	C	B	B
120	2016-06-07	2016-07-04	1	263	6	28	D	D	D
121	2015-12-21	2016-01-05	1	27	1	16	A	C	C
122	2017-10-10	2017-10-11	1	277	0	2	A	A	B
123	2017-11-27	2017-11-27	1	279	0	1	A	A	B
124	2017-09-07	2017-09-07	1	281	0	1	0	0	0
125	2017-04-05	2017-04-06	1	282	0	2	0	0	0
126	2017-11-27	2017-11-27	1	283	0	1	A	A	B
127	2017-06-26	2017-07-09	1	283	0	14	B	A	A
128	2017-10-24	2017-10-29	1	284	1	6	0	0	0
129	2017-10-11	2017-11-28	1	287	13	49	C	B	A
130	2015-07-20	2015-12-10	1	287	36	144	A	C	B
131	2016-06-15	2016-08-03	1	287	11	50	A	C	B
132	2015-03-29	2015-04-05	1	287	2	8	0	0	0
133	2015-12-09	2016-01-21	1	289	4	44	A	C	C
134	2016-05-21	2016-07-04	1	289	9	45	C	C	B
135	2017-11-28	2017-11-29	1	291	0	2	A	A	B
136	2017-10-18	2017-10-18	1	292	0	1	A	B	B
137	2016-06-25	2016-06-25	1	293	0	1	B	A	B
138	2017-05-17	2017-05-17	1	294	0	1	A	A	B
139	2016-05-03	2016-06-26	1	296	7	55	D	B	B
140	2016-06-30	2016-06-30	1	297	0	1	A	A	B
141	2016-06-01	2016-07-11	1	3	9	41	D	D	D
142	2017-08-23	2017-08-23	1	302	0	1	A	A	B
143	2016-05-25	2016-06-10	1	303	3	17	A	B	B
144	2016-06-09	2016-07-14	1	307	11	36	C	C	B
145	2017-05-21	2017-05-22	1	307	0	2	A	A	B
146	2017-07-15	2017-07-15	1	307	0	1	B	B	B
147	2016-10-09	2016-10-23	1	309	2	15	B	C	B
148	2017-06-13	2017-06-19	1	309	1	7	A	A	A
149	2015-07-26	2015-08-17	1	31	8	23	0	0	0
150	2016-06-09	2016-06-29	1	31	3	21	0	0	0
151	2015-02-15	2015-02-23	1	313	1	9	0	0	0
152	2016-05-16	2016-05-27	1	315	3	12	0	0	0
153	2017-03-07	2017-03-07	1	315	0	1	0	0	0
154	2017-06-12	2017-06-12	1	315	0	1	0	0	0
155	2016-03-02	2016-03-03	1	317	0	2	0	0	0
156	2017-07-28	2017-07-29	1	318	0	2	C	C	B
157	2017-10-26	2017-12-10	1	321	4	46	A	A	B
158	2016-03-21	2016-07-14	1	321	19	116	C	C	C
159	2017-05-09	2017-05-12	1	321	1	4	B	B	A
160	2015-07-15	2015-07-17	1	323	0	3	0	0	0
161	2016-06-13	2016-07-09	1	323	6	27	0	0	0
162	2015-03-09	2015-03-22	1	323	5	14	0	0	0
163	2017-07-22	2017-07-23	1	323	0	2	C	B	B
164	2017-11-13	2017-11-16	1	324	0	4	A	A	A
165	2015-03-22	2015-03-23	1	324	0	2	0	0	0
166	2017-06-17	2017-06-17	1	324	0	1	B	B	B
167	2016-03-14	2016-03-14	1	325	0	1	0	0	0
168	2016-06-16	2016-06-22	1	325	1	7	0	0	0
169	2016-05-02	2016-05-08	1	328	2	7	0	0	0
170	2017-04-13	2017-04-16	1	328	1	4	0	0	0
171	2015-07-15	2015-07-16	1	329	0	2	0	0	0
172	2016-05-02	2016-05-05	1	329	1	4	0	0	0
173	2015-07-19	2015-07-31	1	33	1	13	0	0	0
174	2016-08-18	2016-08-26	1	330	1	9	B	D	C
175	2016-05-05	2016-05-09	1	332	1	5	D	C	B
176	2017-05-28	2017-06-16	1	332	2	20	D	D	C
177	2015-12-30	2016-01-18	1	333	1	20	B	C	C
178	2017-02-23	2017-02-23	1	333	0	1	A	A	A
179	2017-09-02	2017-09-02	1	333	0	1	C	B	B
180	2016-06-13	2016-06-14	1	336	0	2	0	0	0
181	2017-07-17	2017-08-13	1	34	5	28	B	A	A
182	2016-05-02	2016-05-04	1	341	0	3	A	B	A
183	2016-06-27	2016-06-27	1	342	0	1	0	0	0
184	2015-09-22	2015-10-08	1	347	2	17	0	0	0
185	2016-05-09	2016-05-09	1	347	0	1	0	0	0
186	2016-06-09	2016-07-27	1	35	19	49	D	D	C
187	2017-05-05	2017-05-05	1	350	0	1	A	B	B
188	2015-09-20	2015-09-25	1	352	1	6	0	0	0
189	2017-01-28	2017-01-28	1	352	0	1	B	B	B
190	2017-05-17	2017-05-18	1	352	0	2	A	A	A
191	2017-04-24	2017-04-26	1	355	0	3	A	A	A
192	2015-07-12	2015-07-14	1	356	0	3	0	0	0
193	2016-05-06	2016-05-06	1	356	0	1	0	0	0
194	2015-07-17	2015-07-22	1	357	1	6	0	0	0
195	2015-09-17	2015-10-11	1	363	2	25	0	0	0
196	2015-12-28	2016-02-08	1	363	3	43	C	D	D
197	2016-05-02	2016-05-06	1	363	1	5	0	0	0
198	2016-06-16	2016-08-03	1	363	9	49	D	D	D
199	2017-04-03	2017-05-27	1	363	9	55	D	C	B
200	2015-07-29	2015-07-29	1	364	0	1	0	0	0
201	2017-02-06	2017-02-06	1	367	0	1	0	0	0
202	2017-10-27	2017-12-05	1	370	5	40	C	B	B
203	2016-01-13	2016-02-19	1	370	3	38	0	0	0
204	2016-02-05	2016-02-24	1	371	1	20	0	0	0
205	2016-05-05	2016-05-05	1	371	0	1	0	0	0
206	2016-06-05	2016-06-10	1	371	2	6	0	0	0
207	2017-10-01	2017-10-03	1	375	0	3	0	0	0
208	2015-08-04	2015-08-23	1	376	2	20	0	0	0
209	2016-01-04	2016-01-04	1	376	0	1	0	0	0
210	2017-04-08	2017-04-24	1	38	2	17	D	D	C
211	2016-06-11	2016-06-13	1	385	0	3	0	0	0
212	2015-07-06	2015-07-26	1	386	5	21	0	0	0
213	2016-01-10	2016-02-06	1	389	3	28	0	0	0
214	2016-06-06	2016-07-16	1	389	11	41	D	D	D
215	2017-05-05	2017-06-26	1	389	10	53	A	B	B
216	2017-10-13	2017-10-22	1	390	1	10	A	B	B
217	2016-01-14	2016-01-15	1	390	0	2	0	0	0
218	2016-04-20	2016-04-25	1	390	2	6	0	0	0
219	2017-05-05	2017-09-05	1	390	14	124	A	D	D
220	2015-07-23	2015-07-26	1	392	1	4	0	0	0
221	2016-05-05	2016-05-09	1	392	1	5	A	B	A
222	2017-05-04	2017-06-16	1	392	7	44	B	B	B
223	2016-06-11	2016-06-14	1	393	1	4	0	0	0
224	2016-05-08	2016-05-08	1	395	0	1	0	0	0
225	2015-07-23	2015-07-23	1	398	0	1	0	0	0
226	2016-05-03	2016-05-06	1	399	1	4	0	0	0
227	2016-06-27	2016-06-30	1	4	1	4	0	0	0
228	2017-11-08	2017-11-08	1	40	0	1	0	0	0
229	2016-03-03	2016-03-03	1	40	0	1	0	0	0
230	2016-05-05	2016-05-14	1	40	7	10	C	D	C
231	2017-08-13	2017-10-08	1	40	6	57	A	B	B
232	2016-05-02	2016-05-09	1	400	2	8	A	B	A
233	2017-02-20	2017-03-07	1	400	1	16	B	B	B
234	2017-10-29	2017-10-31	1	403	0	3	A	B	B
235	2016-05-08	2016-05-08	1	405	0	1	A	A	A
236	2016-06-08	2016-06-10	1	406	0	3	0	0	0
237	2017-10-02	2017-10-05	1	407	1	4	D	C	B
238	2016-05-02	2016-05-10	1	407	6	9	0	0	0
239	2016-06-26	2016-10-20	1	407	10	117	D	D	D
240	2017-03-14	2017-05-13	1	407	9	61	D	D	D
241	2015-08-22	2015-09-02	1	410	1	12	C	B	B
242	2017-04-19	2017-05-02	1	411	2	14	C	D	C
243	2016-01-04	2016-01-08	1	415	1	5	0	0	0
244	2017-10-25	2017-10-30	1	419	1	6	A	B	B
245	2015-02-09	2015-02-09	1	419	0	1	0	0	0
246	2017-02-17	2017-02-18	1	421	0	2	A	B	B
247	2017-03-31	2017-04-03	1	425	1	4	A	C	B
248	2017-06-17	2017-06-23	1	432	2	7	A	B	A
249	2017-03-21	2017-03-22	1	433	0	2	0	0	0
250	2017-04-16	2017-05-02	1	436	3	17	A	C	B
251	2017-07-18	2017-07-25	1	44	2	8	A	A	A
252	2017-10-21	2017-10-21	1	446	0	1	0	0	0
253	2017-09-29	2017-09-29	1	448	0	1	A	A	B
254	2017-10-21	2017-10-21	1	455	0	1	A	A	B
255	2017-11-09	2017-11-13	1	46	1	5	0	0	0
256	2017-05-09	2017-05-09	1	46	0	1	0	0	0
257	2017-06-09	2017-06-09	1	46	0	1	0	0	0
258	2017-09-19	2017-09-30	1	46	5	12	A	B	A
259	2017-06-26	2017-06-27	1	460	0	2	B	A	B
260	2017-01-23	2017-01-24	1	463	0	2	A	A	B
261	2017-02-24	2017-02-28	1	465	1	5	C	B	A
262	2017-04-05	2017-05-04	1	469	2	30	A	B	C
263	2017-11-29	2017-11-30	1	470	0	2	A	B	B
264	2017-10-10	2017-10-12	1	472	0	3	A	B	B
265	2017-04-27	2017-05-11	1	475	1	15	A	B	B
266	2017-06-07	2017-06-07	1	475	0	1	0	0	0
267	2015-07-05	2015-07-21	1	477	1	17	0	0	0
268	2017-08-29	2017-09-27	1	478	2	30	B	A	B
269	2016-06-06	2016-06-08	1	479	0	3	0	0	0
270	2016-06-17	2016-09-17	1	482	12	93	C	D	D
271	2017-02-23	2017-03-20	1	482	4	26	A	A	A
272	2016-07-03	2016-07-04	1	483	0	2	0	0	0
273	2017-03-22	2017-04-09	1	485	1	19	D	C	C
274	2016-03-27	2016-03-28	1	489	0	2	0	0	0
275	2017-12-08	2017-12-09	1	49	0	2	0	0	0
276	2017-07-17	2017-09-17	1	49	7	63	B	B	B
277	2015-07-08	2015-07-18	1	495	4	11	0	0	0
278	2016-06-15	2016-06-15	1	495	0	1	0	0	0
279	2015-02-23	2015-02-23	1	495	0	1	0	0	0
280	2017-05-27	2017-05-29	1	495	0	3	C	B	B
281	2015-08-11	2015-10-05	1	498	9	56	0	0	0
282	2017-02-03	2017-02-04	1	498	0	2	0	0	0
283	2015-10-01	2015-10-02	1	499	0	2	0	0	0
284	2016-06-30	2016-07-01	1	499	0	2	0	0	0
285	2017-01-04	2017-01-07	1	499	1	4	0	0	0
286	2017-09-23	2017-10-13	1	499	1	21	B	A	A
287	2015-11-15	2015-11-17	1	500	0	3	0	0	0
288	2016-01-16	2016-02-10	1	500	10	26	B	C	B
289	2015-07-07	2015-07-24	1	501	10	18	C	D	B
290	2017-02-01	2017-02-12	1	501	1	12	D	C	C
291	2017-07-27	2017-08-15	1	501	1	20	A	A	B
292	2015-07-02	2015-08-09	1	503	3	39	0	0	0
293	2017-02-01	2017-03-12	1	505	2	40	A	A	B
294	2015-08-26	2015-08-27	1	508	0	2	0	0	0
295	2016-01-15	2016-02-05	1	512	3	22	0	0	0
296	2015-08-23	2015-09-21	1	513	16	30	C	D	C
297	2016-01-26	2016-02-03	1	513	6	9	0	0	0
298	2016-02-26	2016-03-01	1	513	3	5	0	0	0
299	2017-02-20	2017-07-03	1	513	34	134	B	B	B
300	2017-12-05	2017-12-05	1	514	0	1	0	0	0
301	2017-03-26	2017-03-27	1	514	0	2	0	0	0
302	2016-06-16	2016-07-10	1	519	7	25	D	D	D
303	2017-03-20	2017-04-19	1	520	3	31	A	B	B
304	2015-08-23	2015-09-01	1	524	1	10	0	0	0
305	2016-02-17	2016-02-18	1	525	0	2	0	0	0
306	2016-01-24	2016-02-03	1	526	1	11	0	0	0
307	2015-11-19	2015-12-05	1	527	1	17	D	C	C
308	2016-01-21	2016-01-28	1	527	1	8	A	B	B
309	2015-11-11	2015-12-07	1	531	4	27	0	0	0
310	2017-03-15	2017-03-15	1	531	0	1	A	B	B
311	2017-04-22	2017-05-08	1	531	1	17	B	C	C
312	2015-07-29	2015-08-13	1	532	0	16	A	B	C
313	2015-07-20	2015-08-08	1	535	3	20	0	0	0
314	2017-02-14	2017-04-13	1	535	8	59	A	C	C
315	2017-07-29	2017-07-29	1	535	0	1	B	A	A
316	2017-06-27	2017-06-29	1	542	0	3	B	C	B
317	2015-11-21	2015-12-12	1	543	3	22	D	D	D
318	2017-05-31	2017-06-02	1	544	0	3	B	A	B
319	2015-11-22	2015-11-24	1	545	0	3	0	0	0
320	2016-06-16	2016-06-16	1	545	0	1	0	0	0
321	2017-03-16	2017-03-16	1	545	0	1	A	B	B
322	2016-03-26	2016-04-01	1	546	1	7	0	0	0
323	2017-09-05	2017-09-05	1	546	0	1	0	0	0
324	2015-12-10	2015-12-17	1	549	3	8	D	D	C
325	2015-02-18	2015-02-21	1	549	1	4	0	0	0
326	2017-03-20	2017-03-25	1	549	1	6	A	A	A
327	2015-08-21	2015-09-13	1	550	14	24	D	D	D
328	2015-12-11	2015-12-13	1	550	0	3	0	0	0
329	2017-04-21	2017-04-21	1	553	0	1	A	B	B
330	2017-07-27	2017-08-01	1	553	0	6	A	A	A
331	2017-10-04	2017-10-05	1	554	0	2	0	0	0
332	2015-09-28	2015-10-04	1	554	1	7	0	0	0
333	2016-01-17	2016-01-21	1	554	1	5	0	0	0
334	2016-03-19	2016-04-10	1	554	1	23	0	0	0
335	2017-02-03	2017-04-03	1	554	23	60	D	C	A
336	2017-03-15	2017-04-01	1	555	1	18	A	B	A
337	2016-01-18	2016-02-08	1	556	2	22	C	C	D
338	2016-02-15	2016-02-28	1	558	1	14	0	0	0
339	2017-02-28	2017-02-28	1	558	0	1	A	B	B
340	2016-02-16	2016-02-20	1	562	1	5	0	0	0
341	2016-06-28	2016-07-21	1	562	7	24	0	0	0
342	2015-02-04	2015-02-13	1	563	2	10	0	0	0
343	2015-07-14	2015-07-19	1	567	1	6	0	0	0
344	2015-07-07	2015-07-07	1	568	0	1	0	0	0
345	2015-08-29	2015-09-01	1	569	4	4	0	0	0
346	2017-03-14	2017-04-11	1	569	2	29	A	C	D
347	2015-03-26	2015-05-18	1	569	3	54	0	0	0
348	2017-11-09	2017-11-18	1	57	1	10	D	C	C
349	2017-02-20	2017-03-07	1	572	1	16	0	0	0
350	2017-10-27	2017-10-27	1	575	0	1	A	B	B
351	2017-08-09	2017-08-09	1	575	0	1	0	0	0
352	2017-06-03	2017-06-04	1	576	0	2	0	0	0
353	2017-06-28	2017-06-29	1	578	0	2	C	B	B
354	2017-04-29	2017-05-12	1	579	1	14	A	A	A
355	2015-02-04	2015-02-21	1	583	5	18	A	C	B
356	2016-01-21	2016-02-28	1	583	3	39	A	C	C
357	2015-01-28	2015-02-20	1	584	7	24	0	0	0
358	2015-01-22	2015-03-08	1	587	3	46	0	0	0
359	2017-03-26	2017-03-26	1	587	0	1	A	B	B
360	2015-09-26	2015-10-05	1	588	2	10	0	0	0
361	2015-02-05	2015-02-21	1	588	2	17	0	0	0
362	2017-03-20	2017-03-22	1	59	0	3	A	A	A
363	2017-06-21	2017-06-21	1	595	0	1	0	0	0
364	2015-07-10	2015-07-10	1	597	0	1	0	0	0
365	2015-03-26	2015-04-27	1	597	3	33	0	0	0
366	2016-02-01	2016-02-05	1	599	1	5	0	0	0
367	2016-01-23	2016-01-24	1	601	0	2	0	0	0
368	2016-06-15	2016-09-10	1	601	14	88	D	D	D
369	2017-03-23	2017-04-07	1	601	5	16	A	C	B
370	2017-09-05	2017-09-07	1	601	0	3	A	B	B
371	2017-06-22	2017-06-22	1	603	0	1	0	0	0
372	2015-09-29	2015-10-01	1	606	0	3	0	0	0
373	2016-06-08	2016-06-10	1	606	0	3	0	0	0
374	2015-09-29	2015-10-04	1	609	3	6	0	0	0
375	2016-06-18	2016-07-07	1	61	2	20	0	0	0
376	2015-01-23	2015-02-19	1	611	3	28	0	0	0
377	2016-01-15	2016-01-23	1	611	4	9	A	C	B
378	2017-02-23	2017-03-07	1	611	1	13	A	A	A
379	2017-04-06	2017-04-06	1	611	0	1	0	0	0
380	2017-05-11	2017-06-05	1	611	2	26	D	B	B
381	2017-07-06	2017-08-08	1	611	3	34	D	D	D
382	2017-02-25	2017-02-25	1	612	0	1	C	B	B
383	2017-05-21	2017-05-21	1	614	0	1	A	B	B
384	2017-04-02	2017-04-02	1	616	0	1	0	0	0
385	2015-11-30	2015-12-12	1	62	2	13	0	0	0
386	2017-01-22	2017-01-23	1	62	0	2	C	B	B
387	2017-01-28	2017-02-21	1	622	4	25	B	B	B
388	2016-05-25	2016-06-17	1	624	3	24	D	D	D
389	2017-03-31	2017-03-31	1	624	0	1	A	B	B
390	2016-03-18	2016-04-08	1	635	1	22	0	0	0
391	2016-01-24	2016-01-25	1	639	0	2	0	0	0
392	2016-06-17	2016-08-20	1	64	16	65	D	D	D
393	2017-07-15	2017-07-19	1	64	0	5	B	A	A
394	2017-08-21	2017-08-24	1	64	3	4	C	C	A
395	2015-07-19	2015-07-31	1	649	1	13	0	0	0
396	2016-05-27	2016-06-23	1	656	3	28	0	0	0
397	2015-07-11	2015-07-12	1	657	0	2	0	0	0
398	2017-05-05	2017-05-05	1	658	0	1	A	A	A
399	2015-07-05	2015-07-06	1	659	0	2	0	0	0
400	2017-03-28	2017-06-05	1	659	12	70	D	C	B
401	2015-10-18	2015-10-20	1	666	0	3	0	0	0
402	2015-12-11	2015-12-11	1	667	0	1	A	A	A
403	2015-07-10	2015-07-15	1	670	7	6	0	0	0
404	2016-05-05	2016-05-07	1	674	0	3	0	0	0
405	2016-01-16	2016-01-17	1	677	0	2	0	0	0
406	2016-06-09	2016-10-11	1	68	35	125	D	D	C
407	2017-02-18	2017-03-21	1	68	3	32	B	C	C
408	2016-05-04	2016-06-29	1	680	34	57	D	D	C
409	2017-06-24	2017-06-26	1	683	0	3	A	A	A
410	2016-06-10	2016-06-10	1	684	0	1	0	0	0
411	2016-06-08	2016-06-09	1	686	0	2	0	0	0
412	2015-02-16	2015-02-18	1	69	0	3	0	0	0
413	2016-06-07	2016-06-11	1	692	2	5	C	B	A
414	2016-06-07	2016-06-13	1	694	1	7	B	D	A
415	2016-05-21	2016-06-02	1	695	2	13	0	0	0
416	2015-10-23	2015-11-11	1	7	7	20	C	D	B
417	2016-06-08	2016-06-11	1	700	1	4	0	0	0
418	2016-05-15	2016-05-31	1	702	1	17	0	0	0
419	2015-07-15	2015-09-06	1	703	7	54	D	D	D
420	2017-02-24	2017-02-24	1	705	0	1	0	0	0
421	2016-05-08	2016-05-23	1	710	14	16	D	D	C
422	2017-05-13	2017-05-13	1	710	0	1	A	B	B
423	2016-05-29	2016-05-31	1	712	0	3	0	0	0
424	2017-04-20	2017-05-22	1	712	3	33	B	C	C
425	2016-06-28	2016-06-28	1	719	0	1	0	0	0
426	2017-10-13	2017-10-15	1	720	0	3	A	A	A
427	2017-12-10	2017-12-10	1	720	0	1	0	0	0
428	2017-12-03	2017-12-03	1	721	0	1	0	0	0
429	2017-03-12	2017-05-10	1	721	11	60	B	B	B
430	2017-08-03	2017-11-03	1	721	19	93	D	C	B
431	2015-07-14	2015-07-15	1	722	0	2	0	0	0
432	2016-04-08	2016-04-09	1	722	0	2	0	0	0
433	2017-09-29	2017-09-30	1	723	0	2	A	B	B
434	2017-12-03	2017-12-09	1	724	3	7	0	0	0
435	2017-03-16	2017-04-04	1	724	1	20	D	C	C
436	2017-07-13	2017-11-11	1	724	39	122	A	B	A
437	2015-07-23	2015-07-29	1	729	1	7	0	0	0
438	2016-06-12	2016-06-19	1	733	3	8	D	D	C
439	2016-06-15	2016-06-15	1	740	0	1	0	0	0
440	2016-04-17	2016-04-17	1	744	0	1	0	0	0
441	2017-08-30	2017-08-30	1	744	0	1	A	B	B
442	2017-06-02	2017-06-02	1	754	0	1	0	0	0
443	2017-12-03	2017-12-03	1	755	0	1	0	0	0
444	2017-09-20	2017-10-03	1	755	4	14	C	D	C
445	2015-07-23	2015-07-24	1	762	0	2	0	0	0
446	2016-06-01	2016-06-07	1	767	3	7	0	0	0
447	2017-07-13	2017-07-29	1	767	5	17	A	B	A
448	2016-06-16	2016-06-17	1	77	0	2	0	0	0
449	2017-08-14	2017-08-14	1	77	0	1	A	B	B
450	2016-06-26	2016-06-26	1	89	0	1	0	0	0
451	2017-06-28	2017-06-29	1	93	0	2	A	A	B
452	2016-05-24	2016-05-25	1	98	0	2	0	0	0
